# Supplementary material for: Trichoderma atroviride P1 Colonization of Tomato Plants Enhances Both Direct and Indirect Defense Barriers Against Insects
Source: Front Physiol. 2019 Jul 5;10:813. doi: 10.3389/fphys.2019.00813 (PMC6624734; doi:10.3389/fphys.2019.00813)
Supplement: Supplementary file 1 [file Table_1.xlsx]

## Sheet: Foglio1
Supplementary table 1. Table lists up-regulated genes in Dwarf San Marzano plants treated with Trichoderma P1.
Locus	FDR	log2FC	Description
Solyc09g008670.3	3.9968e-15	9.16	threonine deaminase
Solyc07g006560.3	9.99201e-16	7.16	Hypersensitive response assisting protein (AHRD V3.3 *** Q9SWC6_CAPAN)
Solyc05g055343.1	1.99103e-08	6.82	Glycosyltransferase (AHRD V3.3 *** K4CEK8_SOLLC)
Solyc07g008380.2	0.000133027	6.67	HXXXD-type acyl-transferase family protein, putative (AHRD V3.3 *** A0A061E8Z9_THECC)
Solyc07g008410.3	0.000275967	6.65	Protein DETOXIFICATION (AHRD V3.3 *** K4CBW0_SOLLC)
Solyc01g006580.3	0.000701426	5.87	2-oxoglutarate-dependent dioxygenase-related family protein (AHRD V3.3 *** B9GL08_POPTR)
Solyc07g061800.3	0.00024925	5.85	SOUL heme-binding family protein (AHRD V3.3 *** AT1G17100.1)
Solyc01g096320.3	0.00219063	5.83	Homeobox-leucine zipper protein (AHRD V3.3 *** M4W1Z7_TOBAC)
Solyc01g056370.3	0.00536125	5.8	Hydroxyproline-rich glycoprotein family protein (AHRD V3.3 --* AT1G61080.6)
Solyc12g010020.2	0.00821186	5.64	Leucine aminopeptidase A1
Solyc11g021060.2	0.000195004	5.56	TOMARPIX proteinase inhibitor
Solyc01g094485.1	0	5.38	NAC transcription factor (AHRD V3.3 *-* B3VK71_TOBAC)
Solyc08g074897.1	0.00524206	5.25	F-box/RNI/FBD-like domain protein (AHRD V3.3 *** G7I7L0_MEDTR)
Solyc03g111100.1	0.00818685	5.23	LOW QUALITY:AtIII18x5-like protein (AHRD V3.3 *** AT3G48510.1)
Solyc12g009240.1	3.69704e-14	5.18	Ethylene-responsive transcription factor ERF017 (AHRD V3.3 *** ERF17_ARATH)
Solyc03g098700.1	0.00530039	5.05	Kunitz-type protease inhibitor D (AHRD V3.3 *** M1LA62_SOLTU)
Solyc12g039080.2	0.0048414	4.99	Leucine-rich repeat protein kinase family protein (AHRD V3.3 *-* AT2G37050.3)
Solyc07g064600.3	8.52545e-05	4.96	inducible plastid-lipid associated protein
Solyc03g098710.1	0.00677122	4.91	Kunitz trypsin inhibitor (AHRD V3.3 *** B8Y888_TOBAC)
Solyc06g067980.3	0.00729174	4.89	Late embryogenesis abundant protein (AHRD V3.3 --* Q2QKE8_CATRO)
Solyc09g064820.1	0.00791735	4.77	EID1-like F-box protein 2 (AHRD V3.3 *** A0A0B2NUB4_GLYSO)
Solyc05g053400.2	0.00541632	4.72	Glycosyltransferase (AHRD V3.3 *** A0A0A1WC49_NICAT)
Solyc09g084450.3	0.00753914	4.66	proteinase inhibitor I
Solyc07g007250.3	4.78498e-06	4.62	Metallocarboxypeptidase inhibitor (AHRD V3.3 *** MCPI_SOLLC)
Solyc06g083800.3	0.00591997	4.6	ROP-interactive CRIB motif protein (AHRD V3.3 *-* A0A072U2K9_MEDTR)
Solyc07g043400.1	0.00591997	4.6	LOW QUALITY:C2H2 and C2HC zinc fingers superfamily protein (AHRD V3.3 --* AT5G26749.2)
Solyc11g022590.1	7.93324e-05	4.59	trypsin inhibitor-like protein precursor
Solyc07g008480.2	0.00218173	4.5	Pentatricopeptide repeat-containing protein (AHRD V3.3 *** A0A0B2SVC3_GLYSO)
Solyc01g016455.1	0.0129619	4.48	Ubiquitin carboxyl-terminal hydrolase-related protein (AHRD V3.3 --* AT3G47890.2)
Solyc08g013970.2	0.000970882	4.45	Disease resistance protein (AHRD V3.3 *** W9RZV6_9ROSA)
Solyc02g084850.3	0.00247407	4.43	Abscisic acid and environmental stress-inducible protein TAS14 (AHRD V3.3 *** TAS14_SOLLC)
Solyc06g074180.2	0.00291644	4.38	Cytochrome P450 (AHRD V3.3 *** Q1AGW1_CAPAN)
Solyc03g098760.2	0.00263938	4.31	Kunitz-type protease inhibitor-like protein (AHRD V3.3 *** Q2XPY0_SOLTU)
Solyc05g005915.1	0.0128861	4.26	Major facilitator superfamily protein (AHRD V3.3 *** AT1G52190.1)
Solyc06g074710.1	0.0080121	4.24	hydroxycinnamoyl-CoA shikimate/quinate hydroxycinnamoyl transferase (AHRD V3.3 *** AT5G48930.1)
Solyc09g092310.1	0.0081653	4.19	Ph-3 resistance protein (AHRD V3.3 *** A0A060D304_SOLPI)
Solyc03g116225.1	0.0049821	4.18	42kDa chitin-binding protein (AHRD V3.3 *** D0VX39_SOLLC)
Solyc09g083440.3	0.000918043	4.17	PIN-I protein (AHRD V3.3 *** Q4FE22_SOLTU)
Solyc03g120420.3	0.00570267	4.17	Peptide-N4-(N-acetyl-beta-glucosaminyl)asparagine amidase A protein (AHRD V3.3 --* AT3G14920.1)
Solyc12g010030.2	0.0101302	4.17	Leucine aminopeptidase (AHRD V3.3 *-* U3PLK3_TOBAC)
Solyc03g025927.1	0.00247064	4.1	membrane steroid binding protein 1 (AHRD V3.3 --* AT5G52240.2)
Solyc01g099870.2	0.00628591	4.1	Bidirectional sugar transporter SWEET (AHRD V3.3 *-* M1CB29_SOLTU)
Solyc05g015715.1	0.0132964	4.08	LOW QUALITY:HAT family dimerisation domain containing protein (AHRD V3.3 --* Q7G4F1_ORYSJ)
Solyc03g096670.3	0.00370784	4.07	Protein phosphatase 2C (AHRD V3.3 *** Q8RVG0_TOBAC)
Solyc01g111950.3	0.00272174	4.06	Proline-rich receptor-like protein kinase PERK1 (AHRD V3.3 *** W9RKU6_9ROSA)
Solyc01g091870.3	0.0115081	4.02	SPX domain-containing family protein (AHRD V3.3 *** B9GW54_POPTR)
Solyc02g069490.3	0.000700609	3.93	Sterol reductase (AHRD V3.3 *** E1VD17_SOLTU)
Solyc04g005070.3	0.00244667	3.91	Major facilitator superfamily protein (AHRD V3.3 *** AT1G52190.1)
Solyc00g187050.3	0.0151513	3.89	leucine aminopeptidase 2
Solyc07g006570.3	0.00584399	3.86	Ribonuclease (AHRD V3.3 *** Q41722_ZINVI)
Solyc03g116360.2	0.00842262	3.81	Regulator of chromosome condensation (RCC1) family protein (AHRD V3.3 *** G7K368_MEDTR)
Solyc03g116970.2	0.0151033	3.8	Sister chromatid cohesion PDS5 B-B (AHRD V3.3 *-* A0A0B0PPN5_GOSAR)
Solyc04g005380.3	0.0113189	3.79	Ninja-family protein AFP1-like protein (AHRD V3.3 *** V5KZR9_SOLNI)
Solyc03g053040.1	0.00469628	3.71	nucleolar RNA-binding Nop10p family protein (AHRD V3.3 -** AT2G20490.3)
Solyc08g076970.3	0.00201295	3.69	Acetylornithine deacetylase (AHRD V3.3 *** ARGE_ARATH)
Solyc09g010566.1	0.013289	3.69	Para-hydroxybenzoic acid efflux pump subunit AaeB/fusaric acid resistance protein (AHRD V3.3 *-* A0A103XP99_CYNCS)
Solyc05g012210.3	0.00255337	3.66	Ninja-family protein AFP1-like protein (AHRD V3.3 *** V5KZR9_SOLNI)
Solyc11g005960.1	0.00279832	3.66	Pentatricopeptide repeat-containing protein (AHRD V3.3 *** A0A103YER7_CYNCS)
Solyc07g043395.1	0.00436631	3.64	Cellulose synthase-like protein (AHRD V3.3 *-* A0A072TVD1_MEDTR)
Solyc12g096780.2	0.0138622	3.64	Zinc binding dehydrogenase, putative (AHRD V3.3 *** B9SW66_RICCO)
Solyc02g079490.3	0.0179681	3.6	HXXXD-type acyl-transferase family protein, putative (AHRD V3.3 *** A0A061G8N7_THECC)
Solyc03g006010.3	0.00630301	3.58	calcium/calcium/calmodulin-dependent Serine/Threonine-kinase (AHRD V3.3 *** AT2G47010.2)
Solyc05g053120.1	0.00235026	3.57	Glycosyltransferase (AHRD V3.3 *** A0A0A1WC49_NICAT)
Solyc12g077650.2	6.22207e-05	3.56	30S ribosomal protein S12, chloroplastic (AHRD V3.3 *** RR12_HELAN)
Solyc07g045145.1	0.00938897	3.56	transmembrane protein (AHRD V3.3 *-* AT4G12680.1)
Solyc02g078690.2	0.0230808	3.56	Carboxypeptidase (AHRD V3.3 *** K4B993_SOLLC)
Solyc02g087540.2	0.0107407	3.53	P-loop containing nucleoside triphosphate hydrolases superfamily protein (AHRD V3.3 *** AT3G28510.1)
Solyc03g098790.3	0.00127302	3.52	Cathepsin D Inhibitor
Solyc01g100800.2	0.0154717	3.51	Pentatricopeptide repeat-containing family protein (AHRD V3.3 *** B9I6P8_POPTR)
Solyc01g057275.1	0.0161405	3.49	Calmodulin-binding transcription activator (AHRD V3.3 *-* A0A072TUJ0_MEDTR)
Solyc08g078190.1	0.00113711	3.47	ethylene-responsive transcription factor
Solyc03g114160.1	0.00472105	3.46	U-box domain-containing protein 19, putative (AHRD V3.3 *** A0A061G0Z4_THECC)
Solyc02g083040.1	0.00280421	3.44	LOW QUALITY:DUF241 domain protein (AHRD V3.3 *** G7LA86_MEDTR)
Solyc07g043390.3	0.00713739	3.44	Cellulose synthase (AHRD V3.3 *** A0A118J5T2_CYNCS)
Solyc01g091590.3	0.0208404	3.44	LOW QUALITY:BON1-associated protein 2 (AHRD V3.3 *** W9QRQ0_9ROSA)
Solyc07g041920.3	0.00632729	3.4	Cysteine protease (AHRD V3.3 *** Q9LRI2_TOBAC)
Solyc02g086650.3	0.00928792	3.36	Phosphoenolpyruvate/phosphate translocator (AHRD V3.3 *** A0A0D3QJC6_CAMSI)
Solyc02g082260.3	0.00622991	3.35	3-hydroxy-3-methylglutaryl CoA reductase
Solyc09g084460.3	0.0187541	3.34	Proteinase inhibitor I (AHRD V3.3 *** Q43648_SOLTU)
Solyc03g120580.3	0.00819916	3.32	Leucine-rich receptor-like protein kinase family protein (AHRD V3.3 --* AT4G20270.1)
Solyc08g075210.2	0.00277837	3.3	HXXXD-type acyl-transferase family protein (AHRD V3.3 *** AT3G30280.1)
Solyc11g012130.2	0.00528105	3.27	Blue copper protein (AHRD V3.3 *** A0A0B2RLQ3_GLYSO)
Solyc07g040960.1	0.00763054	3.26	LOW QUALITY:Harbinger transposase-derived nuclease (AHRD V3.3 *** A0A103Y2W0_CYNCS)
Solyc02g093890.1	0.015789	3.26	Emb|CAB62340.1 (AHRD V3.3 *** Q9FKS6_ARATH)
Solyc01g105770.2	0.0158439	3.26	LOW QUALITY:Leguminosin group485 secreted peptide (AHRD V3.3 *** A0A072UVS4_MEDTR)
Solyc02g086180.3	0.0106751	3.21	Delta(7)-sterol-C5(6)-desaturase (AHRD V3.3 *** SC5D_TOBAC)
Solyc07g008570.3	0.0139519	3.21	Purple acid phosphatase (AHRD V3.3 *** K4CBX4_SOLLC)
Solyc08g074620.3	0.00358663	3.2	polyphenol oxidase precursor
Solyc06g074090.3	0.00637058	3.2	Sterol delta-7 reductase (AHRD V3.3 *** Q6S5A3_TROMA)
Solyc00g277510.2	0.00662671	3.18	Photosystem II protein D1 (AHRD V3.3 *-* PSBA_SOLNI)
Solyc03g124110.2	0.00276432	3.17	CBF
Solyc11g020230.1	0	3.14	Cytokinin-regulated kinase 1 (AHRD V3.3 *** Q9FUK3_TOBAC)
Solyc06g062370.3	0.00554165	3.14	Acid phosphatase-like protein 1 (AHRD V3.3 *** V9MHL3_9ROSA)
Solyc06g073350.3	0.0133687	3.14	Calcium-dependent protein kinase, putative (AHRD V3.3 *** B9T5K7_RICCO)
Solyc12g038800.1	0.0165165	3.14	NADH dehydrogenase subunit F (AHRD V3.3 --* Q4VMS4_9ROSI)
Solyc04g013200.1	0.0157854	3.13	stomatal cytokinesis defective / SCD1 protein (SCD1) (AHRD V3.3 --* AT1G49040.4)
Solyc05g051250.3	0.0215463	3.11	Glutamine synthetase (AHRD V3.3 *** A0A0V0I3I3_SOLCH)
Solyc02g062330.2	0.0217818	3.11	Kinesin-like protein (AHRD V3.3 *** M1AVJ1_SOLTU)
Solyc00g071180.3	0.0243348	3.1	multicystatin
Solyc01g109120.3	0.0150334	3.07	Transducin/WD40 repeat-like superfamily protein (AHRD V3.3 *** AT3G18950.1)
Solyc11g066390.2	0.00196038	3.05	superoxide dismutase 3
Solyc05g012810.2	0.00227185	3.04	transmembrane protein (AHRD V3.3 *-* AT3G11810.1)
Solyc10g075110.2	0.00998956	3.04	Non-specific lipid-transfer protein (AHRD V3.3 *** M1AVB9_SOLTU)
Solyc02g082410.3	0.0171304	3.04	Tonoplast monosaccharide transporter 3
Solyc01g098455.1	0.0155291	3.02	Homogentisate 1,2-dioxygenase (AHRD V3.3 *-* Q9M6U1_SOLLC)
Solyc02g069060.3	0.0219686	3.02	Phloem protein 2 (AHRD V3.3 *** D0R6I7_MALDO)
Solyc11g068920.1	0.0227373	2.97	U-box domain-containing family protein (AHRD V3.3 *** B9P691_POPTR)
Solyc08g081453.1	0.0233281	2.97	Nuclear transport factor 2 (NTF2) family protein (AHRD V3.3 *** AT5G41470.1)
Solyc12g009000.1	0.00554904	2.96	LOW QUALITY:Harbinger transposase-derived nuclease (AHRD V3.3 *** A0A103Y2W0_CYNCS)
Solyc02g086850.2	0.0210225	2.96	RNA exonuclease-like protein (AHRD V3.3 *** A0A072VJ45_MEDTR)
Solyc07g043420.3	0.00713314	2.95	2-oxoglutarate-dependent dioxygenase 2
Solyc09g074270.3	0.0115024	2.95	Gid1-like gibberellin receptor (AHRD V3.3 *** M9N8R2_NICAT)
Solyc10g008040.3	0.0212329	2.95	Late embryogenesis abundant protein-like (AHRD V3.3 *-* Q9LF88_ARATH)
Solyc07g061920.3	0.0191773	2.94	glucan synthase-like 4 (AHRD V3.3 *** AT3G14570.1)
Solyc06g066540.1	0.00274404	2.93	Ethylene-responsive transcription factor TINY (AHRD V3.3 *** TINY_ARATH)
Solyc10g006950.1	0.0107953	2.93	Transducin/WD40 repeat-like superfamily protein (AHRD V3.3 --* AT2G22040.1)
Solyc02g063390.3	0.0120597	2.93	3-oxo-5-alpha-steroid 4-dehydrogenase (AHRD V3.3 *** G7ZZ33_MEDTR)
Solyc04g006970.3	0.0038828	2.92	Phosphoenolpyruvate carboxylase (AHRD V3.3 *** A6YM33_RICCO)
Solyc09g065660.3	0.0186965	2.89	SolycHsfA7
Solyc03g026050.3	0.0223221	2.89	Terminal flower 1 (AHRD V3.3 *** G7ZV36_MEDTR)
Solyc08g005250.3	0.0049902	2.88	Lysine-specific demethylase REF6 (AHRD V3.3 *-* W9R3C0_9ROSA)
Solyc12g006380.2	0.0161461	2.88	2-oxoglutarate-dependent dioxygenase
Solyc03g007230.3	0.00418337	2.87	Protein phosphatase 2c, putative (AHRD V3.3 *** B9RIK1_RICCO)
Solyc04g070987.1	0.00614331	2.87	Terpene cyclase/mutase family member (AHRD V3.3 *-* B1PLH3_SOLLC)
Solyc08g074683.1	0.0143121	2.87	polyphenol oxidase precursor
Solyc06g074463.1	0.0189835	2.87	Peroxisome biogenesis protein 16 (AHRD V3.3 *-* A0A0B2P914_GLYSO)
Solyc05g018880.1	0.00262149	2.86	Lysine-specific histone demethylase 1 like 1 (AHRD V3.3 *-* A0A0B2PY52_GLYSO)
Solyc08g008280.3	0.00266176	2.86	WRKY transcription factor 53
Solyc07g043500.1	0.00725452	2.85	Glycosyltransferase (AHRD V3.3 *** K4CEK8_SOLLC)
Solyc03g112440.1	0.0190194	2.85	Oleosin (AHRD V3.3 *** K4BK98_SOLLC)
Solyc09g061860.3	0.00309771	2.84	UDP-glucose:sterol 3-O-glucosyltransferase (AHRD V3.3 *** Q8H9B4_PANGI)
Solyc07g043460.3	0.00568952	2.84	Cytochrome P450, putative (AHRD V3.3 *** A0A061E4E7_THECC)
Solyc12g088220.2	0.022375	2.84	SlBCAT1
Solyc03g082470.3	0.0127823	2.82	Receptor-like protein kinase (AHRD V3.3 *** M8BN66_AEGTA)
Solyc09g011150.1	0.0151003	2.82	LOW QUALITY:Ycf68 protein (AHRD V3.3 *-* A0A0K0Q5V3_9CARY)
Solyc02g030130.3	0.00520735	2.81	Subtilisin-like protease (AHRD V3.3 *-* A0A0B0N731_GOSAR)
Solyc04g077980.1	0.00779893	2.81	C2H2-type zinc finger protein
Solyc07g045180.3	0.0194021	2.79	CONSTANS-like zinc finger protein (AHRD V3.3 *** A0A023GS52_SOYBN)
Solyc12g039030.1	0.0116902	2.78	LOW QUALITY:Photosystem II protein D1 (AHRD V3.3 *-* PSBA_CUSOB)
Solyc10g009550.3	0.0134859	2.78	LOW QUALITY:WRKY transcription factor 42
Solyc05g050350.2	0.0193197	2.78	Cyclic nucleotide-gated channel (AHRD V3.3 *** A0A0K9PRG4_ZOSMR)
Solyc05g040100.3	0.0230477	2.78	Membrin (AHRD V3.3 *** A0A0V0HLU2_SOLCH)
Solyc01g090340.2	0.00288245	2.77	Ethylene-responsive transcription factor, putative (AHRD V3.3 *** B9RD03_RICCO)
Solyc11g045260.1	0.00506618	2.76	Photosystem II CP43 reaction center protein (AHRD V3.3 *-* PSBC_ZYGCR)
Solyc01g091170.3	0.015244	2.76	arginase 2 ARG2
Solyc06g076400.3	0.00104946	2.75	Protein phosphatase 2C (AHRD V3.3 *** A0A103XPQ7_CYNCS)
Solyc07g043490.1	0.0123892	2.75	UDP-Gal:Tomatidine Galactosyltransferase
Solyc09g007765.1	0.0134268	2.75	Aquaporin-like protein (AHRD V3.3 *-* A0A103XNC2_CYNCS)
Solyc12g098390.2	0.020692	2.75	Ankyrin repeat-containing protein, putative (AHRD V3.3 *** B9RWH7_RICCO)
Solyc01g096740.3	0.0160657	2.73	Protein zinc induced facilitator-like 1 (AHRD V3.3 *** A0A0B0NBA1_GOSAR)
Solyc04g079730.1	0.0199691	2.72	allene oxide synthase
Solyc04g076140.3	0.0227288	2.69	Rho GTPase-activating protein (AHRD V3.3 *** A0A0K9NLF4_ZOSMR)
Solyc09g090910.2	0.0234988	2.69	auxin-regulated IAA13
Solyc01g007955.1	0.0111281	2.68	alpha/beta-Hydrolases superfamily protein (AHRD V3.3 *** AT1G10740.4)
Solyc02g085590.3	0.030463	2.68	BAC19.13 (AHRD V3.3 *** Q9FYW3_SOLLC)
Solyc02g065490.3	0.00952455	2.67	BEL1-related homeotic protein 22 (AHRD V3.3 *** Q8LLE0_SOLTU)
Solyc12g036325.1	0.00984032	2.66	Protein kinase family protein (AHRD V3.3 *** AT5G38210.3)
Solyc10g080640.2	0.0152287	2.66	calmodulin-binding family protein (AHRD V3.3 *** AT3G13600.2)
Solyc01g096410.3	0.0126966	2.64	Phosphatidylinositol-4-phosphate 5-kinase (AHRD V3.3 *** J7K3W0_TOBAC)
Solyc10g086530.1	0.025467	2.64	GRAS family transcription factor (AHRD V3.3 *** A0A072U0I2_MEDTR)
Solyc05g047670.1	0.0129157	2.63	Protein Ycf2 (AHRD V3.3 *-* YCF2_SOLLC)
Solyc07g065920.3	0.0191097	2.63	DUF2431 domain protein (AHRD V3.3 *-* G7IY67_MEDTR)
Solyc09g011860.3	0.0196177	2.63	O-fucosyltransferase family protein (AHRD V3.3 *** AT3G54100.1)
Solyc12g056200.2	0.0210213	2.61	transferring glycosyl group transferase (DUF604) (AHRD V3.3 *** AT4G11350.1)
Solyc01g105320.3	0.0226147	2.61	Metacaspase 1, putative (AHRD V3.3 *** A0A061E359_THECC),Pfam:PF00656
Solyc03g046200.1	0.0229991	2.6	LOW QUALITY:Glycoside hydrolase, family 81 (AHRD V3.3 *** A0A103YH72_CYNCS)
Solyc06g083170.3	0.00625387	2.58	bHLH transcription factor 049
Solyc12g038080.1	0.0103428	2.58	LOW QUALITY:Photosystem II CP43 reaction center protein (AHRD V3.3 *-* PSBC_SOLTU)
Solyc11g007880.1	0.0166097	2.58	LOW QUALITY:cyclin-dependent kinase inhibitor (AHRD V3.3 --* AT1G10690.1)
Solyc03g097580.3	0.016736	2.58	Bidirectional sugar transporter SWEET (AHRD V3.3 *** K4BJH5_SOLLC)
Solyc03g045140.3	0.0212152	2.58	Cyclopropane-fatty-acyl-phospholipid synthase (AHRD V3.3 *** AT3G23530.1)
Solyc06g007790.1	0.0219821	2.58	LOW QUALITY:Transmembrane protein, putative (AHRD V3.3 *-* G7L045_MEDTR)
Solyc03g006840.3	0.00213572	2.57	LOW protein: M-phase inducer phosphatase-like protein (AHRD V3.3 *** AT5G62170.1)
Solyc12g056527.1	0.0223305	2.57	Exocyst complex component, putative (AHRD V3.3 *-* B9T2G4_RICCO)
Solyc11g005560.2	0.012458	2.55	Cellulose synthase (AHRD V3.3 *** M0ZXJ5_SOLTU)
Solyc08g083130.3	0.028586	2.55	Homeobox-leucine zipper protein (AHRD V3.3 *** K4MNF8_MEDSA)
Solyc02g037550.3	0.0224889	2.53	Auxin efflux carrier family protein (AHRD V3.3 *** AT1G76520.2)
Solyc02g093180.3	0.0230936	2.52	HXXXD-type acyl-transferase family protein, putative (AHRD V3.3 *** A0A061DGL0_THECC)
Solyc10g081700.2	0.0249747	2.52	ATP synthase subunit b, chloroplastic (AHRD V3.3 --* ATPF_PIPCE)
Solyc03g123390.3	0.01289	2.51	Alpha/beta-Hydrolases superfamily protein, putative (AHRD V3.3 *** A0A061GDN4_THECC)
Solyc01g079620.3	0.0124181	2.5	colorless fruit epidermis
Solyc01g008910.2	0.0189553	2.5	Scarecrow-like transcription factor 3 family protein (AHRD V3.3 *** B9HP16_POPTR)
Solyc01g060085.1	0.00271325	2.49	Ribulose bisphosphate carboxylase large chain (AHRD V3.3 *-* RBL_LAVLA)
Solyc11g045610.2	0.0123969	2.49	Protein kinase family protein (AHRD V3.3 *** Q9LQ29_ARATH)
Solyc01g091320.3	0.0154595	2.49	sterol C4-methyl oxidase 1-2 (AHRD V3.3 *** AT4G22756.1)
Solyc09g008530.2	0.0288957	2.48	F-box and Leucine Rich Repeat domains containing protein, putative isoform 1 (AHRD V3.3 *** A0A061ETN1_THECC)
Solyc05g006010.3	0.0200401	2.47	Major facilitator superfamily protein (AHRD V3.3 *-* AT1G52190.1)
Solyc01g105510.3	0.0217616	2.47	LMBR1-like membrane protein (AHRD V3.3 *** AT5G65290.1)
Solyc01g066820.3	0.029636	2.47	Kinesin-like protein (AHRD V3.3 *** K4AWT2_SOLLC)
Solyc12g055710.1	0.0210481	2.46	RING/U-box superfamily protein (AHRD V3.3 *** AT1G72310.1)
Solyc08g078680.3	0.0290044	2.46	Sec14p-like phosphatidylinositol transfer family protein (AHRD V3.3 *** AT5G47510.4)
Solyc10g081840.2	0.029014	2.46	Nuclear transcription factor Y subunit (AHRD V3.3 *-* A0A0K9P8V1_ZOSMR)
Solyc01g020285.1	2.99226e-06	2.45	SU(VAR)3-9 homolog 5 (AHRD V3.3 --* AT2G35160.5)
Solyc05g014260.3	0.00874153	2.45	Two-component response regulator (AHRD V3.3 *** W9RKG5_9ROSA)
Solyc01g080680.3	0.0153924	2.45	Sugar facilitator protein 3
Solyc03g115610.3	0.0201146	2.44	LRR receptor-like kinase family protein (AHRD V3.3 *** A0A072USD7_MEDTR)
Solyc06g054620.3	0.0119198	2.43	Zinc finger transcription factor 43
Solyc06g062690.3	0.0148875	2.42	Nucleosome assembly protein 1-1 (AHRD V3.3 *-* NAP1A_ORYSJ)
Solyc09g018440.2	0.0200099	2.42	Gamma-interferon-inducible lysosomal thiol reductase, putative (AHRD V3.3 *-* B9SKZ5_RICCO)
Solyc01g007960.3	0.0300049	2.42	Kinase family protein (AHRD V3.3 *-* B9HTV7_POPTR)
Solyc04g070983.1	0.0122918	2.41	Terpene cyclase/mutase family member (AHRD V3.3 *** K4BT90_SOLLC)
Solyc10g074520.2	0.00246516	2.4	SEC1-family transport family protein (AHRD V3.3 *** B9MYY5_POPTR)
Solyc12g009930.2	0.00496897	2.4	Glycosyltransferase (AHRD V3.3 *** K4DC81_SOLLC)
Solyc10g009480.3	0.0128177	2.4	Cytochrome b561/ferric reductase transmembrane with DOMON related domain-containing protein (AHRD V3.3 *** AT3G61750.1)
Solyc04g082000.3	0.00342	2.38	Phospholipase D (AHRD V3.3 *** K4BVS9_SOLLC)
Solyc09g009040.3	0.0109778	2.38	Sterol C-14 reductase (AHRD V3.3 *** A0A072VKE7_MEDTR)
Solyc12g094615.1	0.0217139	2.38	Ring/U-Box superfamily protein (AHRD V3.3 --* AT2G27950.3)
Solyc03g097530.3	0.016156	2.37	Tapetum determinant 1 (AHRD V3.3 *** A0A061FZR9_THECC)
Solyc08g080270.3	0.0152866	2.36	UDP-galactose transporter (AHRD V3.3 *** M4QC22_PRUPE)
Solyc10g084860.1	0.0347587	2.36	Clade XI lectin receptor kinase (AHRD V3.3 *** K4D3S0_SOLLC)
Solyc05g005960.3	0.00263096	2.35	Major facilitator superfamily protein (AHRD V3.3 *** AT1G52190.1)
Solyc12g088230.2	0.0226042	2.35	mitochondrial malate dehydrogenase
Solyc03g111730.3	0.0286274	2.35	KDEL-tailed cysteine endopeptidase
Solyc02g088090.1	0.00525125	2.34	Calcium-binding EF-hand (AHRD V3.3 *** A0A103YHF0_CYNCS)
Solyc05g010640.3	0.0135128	2.34	LOW QUALITY:Redox-regulatory protein FAM213A (AHRD V3.3 *** A0A1D1Y8W1_9ARAE)
Solyc05g006020.3	0.0152965	2.34	Nucleobase-ascorbate transporter-like protein (AHRD V3.3 *** G7LFG1_MEDTR)
Solyc01g081640.3	0.0190846	2.34	DUF936 family protein (AHRD V3.3 *** A2Q3C0_MEDTR)
Solyc08g007530.3	0.0190919	2.34	AT hook, DNA-binding motif-containing protein (AHRD V3.3 *** A0A103XG23_CYNCS)
Solyc04g051280.3	0.0290011	2.34	Transmembrane protein, putative (AHRD V3.3 *-* A0A072VMC3_MEDTR)
Solyc04g008230.3	0.0298411	2.34	Pectin lyase-like superfamily protein (AHRD V3.3 *** AT1G48100.1)
Solyc04g076950.3	0.011814	2.33	Protein DETOXIFICATION (AHRD V3.3 *** K4BUD2_SOLLC)
Solyc03g114940.3	0.0125616	2.33	Cytochrome P450 (AHRD V3.3 *** A0A103Y3J6_CYNCS)
Solyc05g015433.1	0.0223304	2.33	kinase superfamily with octicosapeptide/Phox/Bem1p domain-containing protein (AHRD V3.3 --* AT2G35050.2)
Solyc03g078730.2	0.0233518	2.33	Glycosyltransferase (AHRD V3.3 *-* K4BHV3_SOLLC)
Solyc08g083500.2	0.0304498	2.33	Cytochrome P450 family protein (AHRD V3.3 *** U5GNW2_POPTR)
Solyc12g006470.2	0.0042107	2.32	viroid RNA-binding protein
Solyc04g039940.2	0.0210718	2.31	Pentatricopeptide repeat-containing family protein (AHRD V3.3 *** B9IHS8_POPTR)
Solyc08g007330.3	0.0285515	2.31	DNA mismatch repair protein mutS (AHRD V3.3 *** A0A0K9NP06_ZOSMR)
Solyc06g009490.3	0.0288478	2.31	Pentatricopeptide repeat-containing protein (AHRD V3.3 *-* A0A0B2SEE4_GLYSO)
Solyc07g018070.3	0.00374651	2.3	Double Clp-N motif-containing P-loop nucleoside triphosphate hydrolases superfamily protein, putative (AHRD V3.3 *** A0A061GSB6_THECC)
Solyc00g136565.1	0.029038	2.3	2-oxoglutarate-dependent dioxygenase-related family protein (AHRD V3.3 *** B9GL08_POPTR)
Solyc10g080395.1	0.0131261	2.29	BED zinc finger,hAT family dimerization domain (AHRD V3.3 *-* A0A061FID3_THECC)
Solyc12g015800.2	0.0287741	2.29	RING/U-box superfamily protein (AHRD V3.3 *** AT5G55970.2)
Solyc06g074030.1	4.65558e-07	2.28	Polynucleotidyl transferase, ribonuclease H-like superfamily protein (AHRD V3.3 *** AT3G44260.1)
Solyc02g063000.3	0.0136499	2.28	Glycosyltransferase (AHRD V3.3 *** K4B6I8_SOLLC)
Solyc11g010850.2	0.0146878	2.28	1-deoxy-D-xylulose 5-phosphate synthase (AHRD V3.3 *** B6E973_STERE)
Solyc10g086250.2	0.0154145	2.28	R2R3MYB transcription factor 75
Solyc01g108780.3	0.0232162	2.28	methylketone synthase 1a
Solyc05g009880.3	0.00624251	2.27	bHLH transcription factor 038
Solyc09g074750.3	0.0148141	2.27	Metal tolerance-like protein (AHRD V3.3 *** A0A072VNM6_MEDTR)
Solyc03g116610.3	0.030275	2.27	Ethylene-responsive transcription factor WIN1 (AHRD V3.3 *** A0A199V560_ANACO)
Solyc05g006870.3	0.00801515	2.25	Thioredoxin H (AHRD V3.3 *** Q4U0W0_NICAL)
Solyc10g052740.2	0.0128205	2.25	LOW QUALITY:Photosystem I P700 chlorophyll a apoprotein A1 (AHRD V3.3 *-* PSAA_POPAL)
Solyc03g025925.1	0.0298991	2.24	F-box family protein (AHRD V3.3 --* D7LS19_ARALL)
Solyc05g051580.3	0.00179775	2.23	Phototropic-responsive NPH3 family protein (AHRD V3.3 *** AT5G10250.2)
Solyc11g069925.1	0.0294816	2.23	Disease resistance protein (AHRD V3.3 *** A0A068EUA9_SOLLC)
Solyc08g068600.3	0.0150133	2.22	Aromatic amino acid decarboxylase 1B (AHRD V3.3 *** Q1KSC5_SOLLC)
Solyc02g061850.3	0.0285773	2.22	Phospholipase D (AHRD V3.3 *** K4B675_SOLLC)
Solyc11g007420.1	0.0296118	2.22	LOW QUALITY:Receptor-like protein kinase (AHRD V3.3 *-* Q9M576_ORYSA)
Solyc10g086500.1	0.0145433	2.21	steroid 5 alpha reductase DET2
Solyc08g074960.3	0.0264426	2.21	Major facilitator superfamily protein (AHRD V3.3 *** AT5G45275.1)
Solyc08g080400.1	0.0273541	2.21	GRAS family transcription factor (AHRD V3.3 *** A0A061G628_THECC)
Solyc10g008230.2	0.0296144	2.21	Disease resistance protein (AHRD V3.3 *** A0A118JXS4_CYNCS)
Solyc04g077440.3	0.0054023	2.2	Squalene monooxygenase (AHRD V3.3 *** Q506K3_DATIN)
Solyc10g076250.2	0.0227039	2.2	Alanine-glyoxylate aminotransferase, putative (AHRD V3.3 *** B9SZ94_RICCO)
Solyc06g072840.3	0.0222534	2.19	Hydrogen peroxide induced protein 1 (AHRD V3.3 *** J7F198_CAMSI)
Solyc03g120070.3	0.0290447	2.19	Pentatricopeptide repeat-containing family protein (AHRD V3.3 *** U5FID5_POPTR)
Solyc12g027753.1	0.0143489	2.18	Ribosomal protein S12 (AHRD V3.3 *-* A0A0C5G6K8_IPOBA)
Solyc07g020790.3	0.0100642	2.17	plastidic glucose translocator 3
Solyc09g007380.3	0.028607	2.17	alpha/beta-Hydrolases superfamily protein (AHRD V3.3 *** AT5G02970.1)
Solyc02g081845.1	0.0298869	2.17	non-specific phospholipase C5 (AHRD V3.3 --* AT3G03540.1)
Solyc05g053270.1	0.0299672	2.17	DNA (Cytosine-5-)-methyltransferase (AHRD V3.3 *-* A0A0K9PLU1_ZOSMR)
Solyc10g084880.3	0.00423738	2.16	LOW QUALITY:Avr9/Cf-9 rapidly elicited protein 137 (AHRD V3.3 *** Q9FQZ2_TOBAC)
Solyc11g012050.1	0.0202036	2.16	MAP kinase kinase kinase 81
Solyc11g005230.1	0.0399265	2.16	LOW QUALITY:Protein SENSITIVITY TO RED LIGHT REDUCED 1 (AHRD V3.3 *** SRR1_ARATH)
Solyc10g079240.2	0.0017727	2.15	SUN-like protein 1
Solyc04g008200.3	0.0217887	2.15	LES457048 hero resistance protein 1 homologue
Solyc05g053965.1	0.0293191	2.15	Amino acid transporter, putative (AHRD V3.3 *** B9S8W8_RICCO)
Solyc07g055870.3	0.0298026	2.15	MAP kinase kinase kinase 58
Solyc06g074020.2	0.0298705	2.15	LOW QUALITY:ovate family protein12
Solyc07g052060.2	0.0362516	2.15	LOW QUALITY:HXXXD-type acyl-transferase family protein, putative (AHRD V3.3 *** A0A061E8Z9_THECC)
Solyc09g018280.1	0.00240183	2.13	Non-specific serine/threonine protein kinase (AHRD V3.3 *** K4CS94_SOLLC)
Solyc05g013440.3	0.00744912	2.13	Amine oxidase (AHRD V3.3 *** K4BY65_SOLLC)
Solyc02g081730.3	0.0123504	2.13	Reticulon-like protein (AHRD V3.3 *** A0A0V0IQH2_SOLCH)
Solyc01g091540.2	0.0152876	2.13	Growth-regulating factor (AHRD V3.3 *** M4T4B6_ARAHY)
Solyc12g013970.2	0.0160252	2.13	Protein kinase, putative (AHRD V3.3 *-* B9SRD1_RICCO),Pfam:PF14381
Solyc02g032940.3	0.00561004	2.12	Aspartic proteinase (AHRD V3.3 *** A0A0B0NH67_GOSAR)
Solyc03g098780.2	0.00465628	2.11	Cathepsin D Inhibitor
Solyc07g043480.1	0.00331088	2.1	Glycosyltransferase (AHRD V3.3 *** A0A0A1WC49_NICAT)
Solyc06g063260.3	0.0123732	2.1	alpha-1,2-Mannosidase (AHRD V3.3 *** K4C757_SOLLC)
Solyc05g055460.1	0.0412858	2.1	LOW QUALITY:Unknown protein (AHRD V3.3 )
Solyc10g006155.1	0.0193763	2.09	GATA transcription factor 26 (AHRD V3.3 --* AT4G17570.3)
Solyc04g082990.3	0.0153846	2.08	Tetratricopeptide repeat protein 37 (AHRD V3.3 *-* A0A1D1Y0Z0_9ARAE)
Solyc05g008235.1	0.0309019	2.08	MYB transcription factor (AHRD V3.3 *** W6JQG2_GENTR)
Solyc05g052410.2	0.0357652	2.08	Dehydration responsive element binding protein (AHRD V3.3 *** Q8GZF2_SOLLC)
Solyc08g080540.3	0.0124473	2.07	SolycHsfB2b
Solyc04g057940.3	0.016104	2.06	Transducin/WD40 repeat-like superfamily protein (AHRD V3.3 *** A0A061EZ85_THECC)
Solyc04g070980.3	0.0166785	2.06	cycloartenol synthase 1
Solyc11g017285.1	0.0286404	2.06	Cyclin-B2-1 (AHRD V3.3 --* CCB21_ORYSJ)
Solyc04g009980.3	0.0305055	2.05	LIGHT-DEPENDENT SHORT HYPOCOTYLS-like protein (DUF640) (AHRD V3.3 *** AT1G07090.1)
Solyc10g076660.2	0.0320787	2.05	2-oxoglutarate (2OG) and Fe(II)-dependent oxygenase superfamily protein (AHRD V3.3 *** AT5G05600.1)
Solyc01g080640.3	0.00263773	2.04	Multidrug resistance protein ABC transporter family protein (AHRD V3.3 *** G7IF78_MEDTR)
Solyc01g103350.3	0.012968	2.04	Protein kinase superfamily protein (AHRD V3.3 *** AT1G09600.1)
Solyc03g006550.3	0.0295695	2.04	Terpene synthase (AHRD V3.3 *** A0A076GH23_POPTR)
Solyc12g094400.2	0.0299947	2.04	Major facilitator superfamily protein (AHRD V3.3 *** AT5G42210.1)
Solyc03g112840.2	0.0298552	2.03	Transmembrane protein, putative (AHRD V3.3 *** G7J5E4_MEDTR)
Solyc08g066320.3	0.0392114	2.03	kinase family with leucine-rich repeat domain-containing protein (AHRD V3.3 *** AT5G25930.1)
Solyc04g014730.3	0.0195928	2.02	fumarylacetoacetase (AHRD V3.3 *** AT1G12050.1)
Solyc09g011160.3	0.0285807	2.02	Regulator of chromosome condensation (RCC1) family protein (AHRD V3.3 *** AT3G53830.3)
Solyc06g068590.3	0.0296699	2.02	Kinase (AHRD V3.3 *** D7KWK7_ARALL)
Solyc03g026270.3	0.0319353	2.02	CBF
Solyc02g082050.3	0.0327577	2.02	disease resistance protein (TIR-NBS-LRR class) (AHRD V3.3 *** AT5G17680.2)
Solyc10g045290.2	0.018574	2.01	Kinase interacting (KIP1-like) family protein, putative (AHRD V3.3 *** A0A061DQM7_THECC)
Solyc04g008330.1	0.0193015	2.01	Glycosyltransferase (AHRD V3.3 *** M1CVU0_SOLTU)
Solyc07g005520.1	0.022793	2.01	BTB/POZ domain-containing protein (AHRD V3.3 *** W9QLB4_9ROSA)
Solyc01g079460.2	0.0328005	2.01	LOW QUALITY:BnaC09g16130D protein (AHRD V3.3 *** A0A078E278_BRANA)
Solyc08g080170.3	0.0130151	2	Hydroxymethylglutaryl-CoA synthase, putative (AHRD V3.3 *** B9RC08_RICCO)
Solyc03g078710.2	0.0190944	2	Glycosyltransferase (AHRD V3.3 *** M1C4J3_SOLTU)
Solyc06g050560.3	0.033514	2	Receptor-like kinase (AHRD V3.3 *** C4TP22_SOYBN)
Solyc10g076780.1	0.0349653	2	LOW QUALITY:Alpha 1,4-glycosyltransferase family protein (AHRD V3.3 *** A0A061EQG3_THECC)
Solyc07g054310.2	0.0190331	1.98	Cell wall protein (AHRD V3.3 *** I6QN83_HELAN)
Solyc01g110440.4	0.000221176	1.97	arginine decarboxylase
Solyc02g033030.3	0.0300184	1.97	Histone H1 (AHRD V3.3 --* A0A151SYJ4_CAJCA)
Solyc01g080570.3	0.037815	1.97	inosine-uridine preferring nucleoside hydrolase family protein (AHRD V3.3 *** AT5G18860.2)
Solyc03g007510.3	0.0307025	1.96	hAT transposon superfamily (AHRD V3.3 *** AT1G79740.4)
Solyc08g078695.1	0.0342533	1.96	Heat-shock protein, putative (AHRD V3.3 *** B9SSG1_RICCO)
Solyc00g028960.1	0.0417897	1.96	Glutaredoxin family protein (AHRD V3.3 *** D7LTB3_ARALL)
Solyc03g119190.3	0.0195987	1.95	Reticulon-like protein (AHRD V3.3 *** K4BM68_SOLLC)
Solyc01g091330.3	0.0209954	1.95	Glutathione S-transferase (AHRD V3.3 *** A5YRT3_CAPAN)
Solyc01g081160.3	0.0300146	1.95	Beta-glucosidase, putative (AHRD V3.3 *-* B9SAQ1_RICCO)
Solyc04g082500.3	0.0349063	1.95	Protein kinase (AHRD V3.3 *** S8D6E4_9LAMI)
Solyc08g067360.3	0.04735	1.95	WRKY transcription factor 45
Solyc04g082980.2	0	1.94	Tetratricopeptide repeat-containing protein (AHRD V3.3 *** D7KTV6_ARALL)
Solyc05g052980.3	0.000779183	1.94	Protein phosphatase 2C (AHRD V3.3 *** Q8RVG0_TOBAC)
Solyc09g066140.3	0.0158936	1.94	myosin-binding protein (Protein of unknown function, DUF593) (AHRD V3.3 *-* AT1G08800.4)
Solyc06g074760.2	0.0192598	1.94	Ring/U-Box superfamily protein (AHRD V3.3 *** AT2G27950.3)
Solyc02g083700.3	0.0210766	1.94	Alpha-mannosidase (AHRD V3.3 *** K4BAN8_SOLLC)
Solyc12g099290.2	0.0153813	1.93	Aldehyde dehydrogenase (AHRD V3.3 *** M1A0H0_SOLTU)
Solyc08g068810.3	0.0039762	1.92	Ubiquitin carboxyl-terminal hydrolase, putative (AHRD V3.3 *** B9RNT9_RICCO)
Solyc03g115890.3	0.023348	1.92	expansin 10
Solyc06g043036.1	0.0303634	1.92	Ycf68 (AHRD V3.3 *-* A0A1B0ZD71_EUCUL)
Solyc04g071030.1	0.0125522	1.91	U-box domain-containing family protein (AHRD V3.3 *** B9HEI4_POPTR)
Solyc06g062460.3	0.0131028	1.91	bHLH transcription factor136
Solyc06g082980.3	0.015024	1.91	Sterol-8,7-isomerase (AHRD V3.3 *** Q2TU57_MAIZE)
Solyc04g076720.2	0.0202002	1.91	WD repeat domain phosphoinositide-interacting 3 (AHRD V3.3 *-* A0A0B0P0U0_GOSAR)
Solyc07g053360.3	0.0223599	1.91	Late embryogenesis abundant domain-containing family protein (AHRD V3.3 *** B9IQP9_POPTR)
Solyc08g083115.1	0.0256844	1.91	Cystathionine gamma-synthase, putative (AHRD V3.3 *** B9RYU1_RICCO)
Solyc05g056080.3	0.0280136	1.91	zinc finger B-box protein (AHRD V3.3 *** AT5G45410.5)
Solyc05g013860.3	0.0220728	1.9	sieve element occlusion protein (AHRD V3.3 *** AT1G67790.1)
Solyc10g085670.2	0.0223779	1.9	MAP kinase kinase kinase 79
Solyc04g074820.2	0.0254582	1.9	RING/U-box superfamily protein, putative (AHRD V3.3 *** A0A061FLH6_THECC)
Solyc02g079070.3	0.0364076	1.9	Myosin-related family protein (AHRD V3.3 *-* B9H5P2_POPTR)
Solyc06g084200.2	0.00491284	1.89	flocculation FLO11-like protein (AHRD V3.3 *** AT4G02715.2)
Solyc06g005750.3	0.0116974	1.89	sterol 4-alpha-methyl-oxidase 2-1 (AHRD V3.3 *** AT1G07420.1)
Solyc09g015520.3	0.0152389	1.89	Leucine-rich receptor-like protein kinase family protein (AHRD V3.3 *** A0A061EHU9_THECC)
Solyc04g014910.3	0.0159682	1.89	Receptor-like kinase (AHRD V3.3 *-* A0A072TRW0_MEDTR)
Solyc12g056280.2	0.0229102	1.89	Transmembrane protein, putative (AHRD V3.3 *-* G7J9T6_MEDTR)
Solyc08g042010.3	0.0350786	1.89	Exostosin family protein (AHRD V3.3 *** A0A061GIR4_THECC)
Solyc10g078495.1	0.036418	1.89	Aquaporin SIP1-1 (AHRD V3.3 *-* W9R1G9_9ROSA)
Solyc05g013310.1	0.0127771	1.88	protein kinase family protein (AHRD V3.3 *-* AT5G54380.1)
Solyc06g036290.3	0.0177402	1.88	heat shock protein 90
Solyc05g047440.1	0.0301539	1.88	LOW QUALITY:Ycf1 protein (AHRD V3.3 *-* ATCG01130.1)
Solyc06g063280.1	0.0376129	1.88	LOW QUALITY:Zinc finger family protein (AHRD V3.3 *** B9HV28_POPTR)
Solyc07g053140.3	0.00538602	1.87	Zinc finger, B-box (AHRD V3.3 *** A0A103Y7X2_CYNCS)
Solyc10g076920.2	0.019606	1.87	BZIP transcription factor (AHRD V3.3 *** A0A0K2JKR5_GOSHI)
Solyc08g068920.3	0.0295721	1.87	Protein kinase superfamily protein (AHRD V3.3 *** AT5G24970.3)
Solyc01g105450.3	0.0300018	1.87	ABC transporter G family member (AHRD V3.3 *** A0A0K9NWI5_ZOSMR)
Solyc03g006380.3	0.0300052	1.87	Transcriptional corepressor LEUNIG (AHRD V3.3 *-* A0A151S5T0_CAJCA)
Solyc01g099960.3	0.031019	1.87	Pectinesterase (AHRD V3.3 *-* M1CB39_SOLTU)
Solyc09g056135.1	0.0320383	1.87	Ribosomal protein L15 (AHRD V3.3 *** K4CTA8_SOLLC)
Solyc01g102520.3	0.0324586	1.87	MLO-like protein (AHRD V3.3 *** K4B1I0_SOLLC)
Solyc03g116890.3	0.0434156	1.87	WRKY transcription factor 39
Solyc11g007020.2	0.013173	1.86	mevalonate disphosphate decarboxylase
Solyc02g065570.1	0.0162365	1.86	LOW QUALITY:Rotundifolia-like protein (AHRD V3.3 *** A0A072V006_MEDTR)
Solyc06g034340.2	0.0298631	1.86	NAC domain protein, (AHRD V3.3 *** A0A061G781_THECC)
Solyc01g006380.2	0.0301388	1.86	U-box domain-containing protein (AHRD V3.3 *** B6V8G2_HELAN)
Solyc02g068890.3	0.0141282	1.85	Pentatricopeptide repeat superfamily protein (AHRD V3.3 *** A0A061GDR6_THECC)
Solyc03g094060.3	0.0182002	1.85	RNA-binding family protein (AHRD V3.3 *-* A0A061FZR7_THECC)
Solyc05g014710.3	0.0223312	1.85	Remorin family protein (AHRD V3.3 *** A0A061E752_THECC)
Solyc04g071285.1	0.0230314	1.85	ENTH/ANTH/VHS superfamily protein (AHRD V3.3 --* AT5G57200.1)
Solyc10g074680.2	0.0305144	1.85	Transcription factor GRAS (AHRD V3.3 *** A0A103Y639_CYNCS)
Solyc04g005410.2	0.0373419	1.85	Ureide permease (AHRD V3.3 *** A0A124SG70_CYNCS)
Solyc05g013870.3	0.000593749	1.84	Sieve element occlusion c (AHRD V3.3 *** E2FKK0_9SOLN)
Solyc03g115370.3	0.0259286	1.84	Diacylglycerol kinase (AHRD V3.3 *** K4BL39_SOLLC)
Solyc01g090710.3	0.0348045	1.84	cytosolic malate dehydrogenase
Solyc12g011010.2	0	1.83	protodermal factor 1 (AHRD V3.3 *-* AT2G42840.1)
Solyc08g074630.2	0.0109012	1.83	polyphenol oxidase precursor
Solyc01g109210.2	0.015602	1.83	LOW QUALITY:transmembrane protein (AHRD V3.3 --* AT3G04310.2)
Solyc11g021160.1	0.0263005	1.83	Ycf68 (AHRD V3.3 *-* A0A0F6NPP1_9POAL)
Solyc04g055260.3	0.0337292	1.83	S-adenosyl-L-methionine:benzoic acid/salicylic acid carboxyl methyltransferase (AHRD V3.3 *** H9BID1_NICAT)
Solyc11g013300.2	0.0349655	1.83	Pathogenesis-related thaumatin family protein (AHRD V3.3 *** G7K8X4_MEDTR)
Solyc01g081620.3	0.0377254	1.83	Vacuolar protein sorting-associated protein 62 (AHRD V3.3 *** A0A103Y146_CYNCS)
Solyc10g085120.2	0.0194503	1.82	Receptor-kinase, putative (AHRD V3.3 *** B9SUC9_RICCO)
Solyc03g026040.3	0.02071	1.82	LRR receptor-like kinase family protein (AHRD V3.3 *** A0A072VNY9_MEDTR)
Solyc01g109150.4	0.020984	1.82	cytochrome P450 CYP74C4
Solyc12g010310.2	0.0376616	1.82	Zinc finger CCCH domain-containing protein 32 (AHRD V3.3 --* C3H32_ORYSJ)
Solyc08g076025.1	0.0150318	1.81	Tudor/PWWP/MBT superfamily protein (AHRD V3.3 *** G7K6J4_MEDTR)
Solyc09g008370.1	0.0156978	1.81	LOW QUALITY:Major facilitator superfamily protein (AHRD V3.3 *** AT2G39210.1)
Solyc05g051660.1	0.018563	1.81	Alpha/beta-Hydrolases superfamily protein (AHRD V3.3 *** A0A061EKQ6_THECC)
Solyc01g087580.3	0.0285507	1.81	LOW QUALITY:SNF2 domain-containing protein / helicase domain-containing protein / zinc finger protein-like protein (AHRD V3.3 --* AT1G50410.4)
Solyc01g108020.3	0.0130081	1.8	Thioredoxin (AHRD V3.3 *** A0A103YKE9_CYNCS)
Solyc01g080910.2	0.0229998	1.8	LOW QUALITY:polyadenylate-binding protein 1-B-binding protein (AHRD V3.3 *** AT4G19950.1)
Solyc11g068895.1	0.0290517	1.8	Late embryogenesis abundant (LEA) hydroxyproline-rich glycoprotein family (AHRD V3.3 *** AT2G27260.1)
Solyc02g068040.3	0.0111706	1.79	RNI-like superfamily protein (AHRD V3.3 --* AT4G02760.9)
Solyc10g005740.2	0.0194957	1.79	Sec14p-like phosphatidylinositol transfer family protein (AHRD V3.3 *** AT1G55690.5)
Solyc10g005220.3	0.0217431	1.79	RING/U-box superfamily protein (AHRD V3.3 *-* A0A061DVK0_THECC)
Solyc10g080150.2	0.0295574	1.79	Methyltransferase (AHRD V3.3 *-* K4D2Q6_SOLLC)
Solyc02g068610.2	0.0295936	1.79	Ankyrin repeat-containing protein (AHRD V3.3 *** A0A103XBI3_CYNCS)
Solyc02g078910.3	0.0398487	1.79	endonuclease AM238701
Solyc04g026020.3	0.0410476	1.79	Sieve element occlusion c (AHRD V3.3 *** E2FKK0_9SOLN)
Solyc04g072030.1	0.0127231	1.78	Dynamin-related protein (AHRD V3.3 *** A0A1B0UTC3_TOBAC)
Solyc02g083720.3	0.019632	1.78	MLO-like protein (AHRD V3.3 *** K4BAP0_SOLLC)
Solyc03g119580.1	0.039437	1.78	Solanum lycopersicum Cytokinin Response Factor 9
Solyc10g009110.1	0.00127228	1.77	ethylene response factor F.5
Solyc04g054990.3	0.00994392	1.77	PLAT domain-containing protein 1 (AHRD V3.3 *** PLAT1_ARATH)
Solyc09g075580.1	0.0130343	1.77	LOW QUALITY:CheY-like two-component responsive regulator family protein (AHRD V3.3 --* AT4G18020.9)
Solyc09g008780.3	9.99201e-16	1.76	Sulfite exporter TauE/SafE family protein (AHRD V3.3 *** AT2G36630.1)
Solyc03g043940.3	0.0123417	1.76	O-methyltransferase, putative (AHRD V3.3 *-* B9SGP1_RICCO)
Solyc02g079290.3	0.0285477	1.76	protein SELF PRUNING 2G
Solyc10g009050.3	0.0157923	1.75	DUF616 family protein (AHRD V3.3 *** A0A072UMP6_MEDTR)
Solyc01g109330.3	0.0285443	1.75	cytochrome c biogenesis protein-like protein
Solyc07g017730.3	0.0161291	1.74	Glucan endo-1,3-beta-glucosidase, putative (AHRD V3.3 *** B9RR12_RICCO)
Solyc10g086270.2	0.0221731	1.74	R2R3MYB transcription factor 28
Solyc08g065210.1	0.030043	1.74	LOW QUALITY:Type I inositol-1,4,5-trisphosphate 5-phosphatase (AHRD V3.3 --* A0A072UDV5_MEDTR)
Solyc06g068690.3	0.0412113	1.74	Respiratory burst oxidase homolog (AHRD V3.3 *** Q84KK7_NICBE)
Solyc02g078130.3	0.0438588	1.74	bHLH transcription factor 079
Solyc11g040330.2	0.0210941	1.73	Endo-1,4-beta-xylanase A (AHRD V3.3 *** W9QKK9_9ROSA)
Solyc07g063410.3	0.0220067	1.73	JA2-like
Solyc01g102300.3	0.0229104	1.73	bHLH transcription factor 006
Solyc11g005650.1	0.0294028	1.73	Ubiquitin family protein (AHRD V3.3 *-* AT4G02890.4)
Solyc04g052890.2	0.0452075	1.73	SAUR-like auxin-responsive protein family, putative (AHRD V3.3 *** A0A061E5G9_THECC)
Solyc06g069460.2	0.0456649	1.73	TCP transcription factor 6
Solyc01g096370.3	0.0117178	1.72	Basic helix loop helix (BHLH) family transcription factor (AHRD V3.3 *** A0A072TYH1_MEDTR)
Solyc05g026180.2	0.0162984	1.72	NAC domain protein (AHRD V3.3 *** S5R947_9ROSA)
Solyc05g053010.1	0.0191497	1.72	Lectin receptor kinase (AHRD V3.3 *** A0A0K1U259_NICBE)
Solyc11g021210.1	0.0285731	1.72	Cytochrome c biogenesis protein CcsA (AHRD V3.3 *** CCSA_SOLLC)
Solyc11g011540.2	0.0314522	1.72	F-box/RNI/FBD-like domain protein (AHRD V3.3 *** A0A072TJJ6_MEDTR)
Solyc06g068130.3	0.0465189	1.72	Tetratricopeptide repeat (TPR)-like superfamily protein (AHRD V3.3 *-* AT5G20190.1)
Solyc10g008650.2	0.0471044	1.72	LOW QUALITY:Anthocyanin 5-aromatic acyltransferase (AHRD V3.3 *-* A0A0B2REP2_GLYSO)
Solyc05g017760.3	0.0228351	1.71	Acetoacetyl-CoA thiolase (AHRD V3.3 *** F5CLC4_CATRO)
Solyc05g042050.3	0.0416406	1.71	Nodulin MtN21/EamA-like transporter family protein (AHRD V3.3 *-* A0A072UZA3_MEDTR)
Solyc06g071500.3	0.0126696	1.7	Boron transporter, putative (AHRD V3.3 *** B9RB14_RICCO)
Solyc01g090730.3	0.0210176	1.7	Squamosa promoter binding protein 8b
Solyc06g075370.3	0.0280824	1.7	Dof zinc finger protein (AHRD V3.3 *** W9RMR9_9ROSA)
Solyc02g092070.3	0.02963	1.7	Growth-regulating factor (AHRD V3.3 *** A0A072VEY4_MEDTR)
Solyc06g051820.3	0.0349536	1.7	myosin heavy chain-like protein (AHRD V3.3 *** AT5G53310.1)
Solyc07g065930.3	0.00963333	1.69	BTB/POZ domain-containing protein (AHRD V3.3 *** A0A097PQ10_SOLLC)
Solyc04g078840.3	0.00983063	1.69	AREB
Solyc07g066230.3	0.0160102	1.69	Receptor kinase (AHRD V3.3 *** A0A0K9P920_ZOSMR)
Solyc06g075600.3	0.0300199	1.69	Ankyrin repeat family protein (AHRD V3.3 *** AT1G07710.2)
Solyc06g075420.1	0.035062	1.69	LOW QUALITY:phosphoglycerate/bisphosphoglycerate mutase family protein (AHRD V3.3 --* AT5G22620.6)
Solyc08g074890.3	0.040251	1.69	U6 snRNA phosphodiesterase (AHRD V3.3 --* A0A0D2PGE3_GOSRA)
Solyc11g069330.1	0.00212543	1.68	LOW QUALITY:S-adenosyl-L-methionine-dependent methyltransferases superfamily protein (AHRD V3.3 *-* AT1G24480.1)
Solyc04g072900.1	0.00266748	1.68	dehydration-responsive element binding protein 3
Solyc03g093560.1	0.00623168	1.68	ethylene response factor C.6
Solyc07g063000.3	0.0152765	1.68	Leucine-rich repeat receptor-like protein kinase (AHRD V3.3 *** C0LGV8_ARATH)
Solyc05g056200.1	0.0204251	1.68	Kinase family protein (AHRD V3.3 *** A9P9S2_POPTR)
Solyc11g007840.2	0.0262231	1.68	Glycosyl transferase, family 1 (AHRD V3.3 *** A0A124SG25_CYNCS)
Solyc06g009225.1	0.028661	1.68	Translation factor GUF1 homolog, mitochondrial (AHRD V3.3 --* GUF1_ORYSI)
Solyc05g005630.3	0.0295153	1.68	Ubiquitin-like-specific protease 1D (AHRD V3.3 *** A0A0B2R587_GLYSO)
Solyc02g036260.3	0.0407994	1.68	ERD (early-responsive to dehydration stress) family protein (AHRD V3.3 *** AT4G22120.6)
Solyc04g005620.3	0.0434973	1.68	CASP-like protein (AHRD V3.3 *** K4BNG8_SOLLC)
Solyc10g079150.2	0.049548	1.68	Nuclear transcription factor Y subunit (AHRD V3.3 *-* A0A0K9P8V1_ZOSMR)
Solyc10g085225.1	0.0166209	1.67	Heparanase-like protein 3 (AHRD V3.3 *** HPSE3_ARATH)
Solyc10g076450.2	0.0193427	1.67	Ethylene-overproduction protein 1 (AHRD V3.3 *** W9R4D2_9ROSA)
Solyc01g096930.3	0.021882	1.67	Phospholipid-transporting ATPase (AHRD V3.3 *** B9RL26_RICCO)
Solyc02g092820.3	0.0285833	1.67	IAA-amido synthetase 3-4
Solyc04g072895.1	0.0300079	1.67	Transducin/WD40 repeat-like superfamily protein (AHRD V3.3 *** AT1G78070.1)
Solyc12g007205.1	0.0405821	1.67	ATP synthase subunit a, chloroplastic (AHRD V3.3 --* ATPI_AMBTC)
Solyc04g009960.3	0.00169258	1.66	L-allo-threonine aldolase-related protein (AHRD V3.3 *** Q2XPX1_SOLTU)
Solyc02g084720.3	0.00277337	1.66	beta-galactosidase 6
Solyc03g114730.3	0.00745029	1.66	O-fucosyltransferase family protein (AHRD V3.3 *** AT5G15740.1)
Solyc01g086720.3	0.0153787	1.66	C2 domain-containing family protein (AHRD V3.3 *** B9GFS0_POPTR)
Solyc07g056570.1	0.00239635	1.65	notabilis
Solyc03g114240.3	0.00343779	1.65	Polygalacturonase non-catalytic protein (AHRD V3.3 *** G7K1D9_MEDTR)
Solyc02g072240.3	0.0113633	1.65	cellulose synthase family protein (AHRD V3.3 *** AT4G18780.1)
Solyc11g011980.3	0.0149875	1.65	Transducin/WD40 repeat-like superfamily protein (AHRD V3.3 *** AT2G32950.1)
Solyc08g007000.3	0.0226707	1.65	Protein phosphatase 2C (AHRD V3.3 *** A0A124SBW4_CYNCS)
Solyc01g109470.3	0.040745	1.65	Dehydration-responsive protein RD22, putative (AHRD V3.3 *** B9RBD8_RICCO)
Solyc09g065430.3	0.040745	1.65	Lipid transfer protein (AHRD V3.3 *** G7K520_MEDTR)
Solyc10g084045.1	0.0416496	1.65	Transcription initiation factor TFIID subunit 8 (AHRD V3.3 --* A0A151S2X5_CAJCA)
Solyc05g007290.2	0.0474392	1.65	Regulator of chromosome condensation (RCC1) family with FYVE zinc finger domain-containing protein (AHRD V3.3 *** AT1G69710.2)
Solyc01g066457.1	0.00429618	1.64	Epoxide hydrolase-like protein (AHRD V3.3 *** A0A103YM44_CYNCS)
Solyc04g009470.3	0.0170846	1.64	Mediator of RNA polymerase II transcription subunit 15a (AHRD V3.3 *-* A0A199VYD9_ANACO)
Solyc07g055710.3	0.0288039	1.64	SolycHsfA4b
Solyc01g107260.3	0.0289848	1.64	myosin-2 heavy chain-like protein (AHRD V3.3 *** AT1G49870.1)
Solyc06g083700.3	0.0480781	1.64	Flavin-containing monooxygenase (AHRD V3.3 *** D2IGV4_SOLLC)
Solyc03g116100.3	0.0127894	1.63	R2R3MYB transcription factor 31
Solyc09g005750.3	0.0151281	1.63	5-methyltetrahydropteroyltriglutamate--homocysteine methyltransferase (AHRD V3.3 *** A0A0B0NEJ5_GOSAR)
Solyc11g066490.1	0.0224092	1.63	LOW QUALITY:Late embryogenesis abundant (LEA) hydroxyproline-rich glycoprotein family (AHRD V3.3 *** AT5G22870.1)
Solyc02g070845.1	0.0447032	1.63	F-box family protein (AHRD V3.3 *-* B9IAP0_POPTR)
Solyc02g064680.3	0.00676458	1.62	Calcium-transporting ATPase (AHRD V3.3 *** M1BXI4_SOLTU)
Solyc03g007530.3	0.0140127	1.62	ABC transporter family protein (AHRD V3.3 *** U5FPJ5_POPTR)
Solyc11g069700.2	0.0209976	1.62	Elongation factor 1-alpha (AHRD V3.3 *** EF1A_SOLLC)
Solyc09g005660.3	0.0220676	1.62	HAT transposon superfamily protein, putative (AHRD V3.3 *** A0A061GGP8_THECC)
Solyc02g082100.3	0.0224631	1.62	RING/U-box superfamily protein (AHRD V3.3 *-* AT2G34920.2)
Solyc06g050130.3	0.0225638	1.62	Alpha-galactosidase (AHRD V3.3 *** K4C5G0_SOLLC)
Solyc02g091650.3	0.0303812	1.62	DNA-binding protein, putative (duplicated DUF1399) (AHRD V3.3 *** AT2G22660.3)
Solyc08g007300.2	0.0310254	1.62	myb family transcription factor (AHRD V3.3 *-* AT5G41020.1)
Solyc07g064050.3	0.0312595	1.62	Hexosyltransferase (AHRD V3.3 *** K4CH88_SOLLC)
Solyc06g005980.3	0.0314656	1.62	Anthranilate synthase (AHRD V3.3 *** A0A0K9NQE9_ZOSMR)
Solyc03g117540.3	0.0474163	1.62	ABC transporter family protein (AHRD V3.3 *-* A0A097P9P6_HEVBR)
Solyc06g068620.3	0.00114532	1.61	Negative regulator of sporulation MDS3 (AHRD V3.3 *-* A0A0B0N6H6_GOSAR)
Solyc08g079890.2	0.00214838	1.61	P69e protein
Solyc06g035580.3	0.00698176	1.61	Glucose-methanol-choline (GMC) oxidoreductase family protein (AHRD V3.3 *** AT5G51950.3)
Solyc05g052570.3	0.0092675	1.61	Zinc finger transcription factor 39
Solyc09g007910.3	0.015365	1.61	Phenylalanine ammonia-lyase (AHRD V3.3 *** A0A124SBF6_CYNCS)
Solyc08g082110.3	0.0216251	1.61	WRKY transcription factor 54
Solyc06g074110.3	0.0225528	1.61	BHLH transcription factor-like protein (AHRD V3.3 *-* A0A072UK41_MEDTR)
Solyc01g068360.3	0.0237819	1.61	Protein kinase (AHRD V3.3 *** Q2HVC0_MEDTR)
Solyc12g005970.1	0.0227816	1.6	LOW QUALITY:Disease resistance protein (CC-NBS-LRR class) family (AHRD V3.3 *-* AT5G35450.2)
Solyc08g068160.2	0.0250259	1.6	Flavin-containing monooxygenase (AHRD V3.3 *** K4CM40_SOLLC)
Solyc09g090320.2	0.028553	1.6	Kinesin, motor domain-containing protein (AHRD V3.3 *** A0A103XI34_CYNCS)
Solyc02g080100.1	0.0287454	1.6	LOW QUALITY:Late embryogenesis abundant (LEA) hydroxyproline-rich glycoprotein family (AHRD V3.3 *** AT4G05220.1)
Solyc08g080890.3	0.0312758	1.6	heavy metal atpase 5 (AHRD V3.3 *** AT1G63440.1)
Solyc01g099150.4	0.0347779	1.6	Desiccation-related protein PCC13-62
Solyc08g007540.3	0.0414524	1.6	ACT domain-containing family protein (AHRD V3.3 *** B9N3K8_POPTR)
Solyc10g055250.1	0.0423104	1.6	LOW QUALITY:cold shock domain protein 1 (AHRD V3.3 *** AT4G36020.2)
Solyc02g086430.3	0.0434909	1.6	Zinc finger transcription factor 21
Solyc07g054115.1	0.0436777	1.6	Malate dehydrogenase [NADP], chloroplastic (AHRD V3.3 --* MDHP_MAIZE)
Solyc12g006460.2	0.0123936	1.59	Cytochrome P450 (AHRD V3.3 *** A0A124SDJ5_CYNCS)
Solyc01g017860.3	0.0317521	1.59	Delta-1-pyrroline-5-carboxylate synthase (AHRD V3.3 --* P5CS_VIGAC)
Solyc07g045185.1	0.031952	1.59	CONSTANS-like zinc finger protein (AHRD V3.3 *-* A0A023GS52_SOYBN)
Solyc02g077980.2	0.0349624	1.59	Late embryogenesis abundant protein (LEA) family protein (AHRD V3.3 --* AT4G13230.1)
Solyc10g076500.2	0.0401723	1.59	Leucine-rich-repeat receptor-like protein (AHRD V3.3 *** A0A0D4WVW2_GOSBA)
Solyc06g068700.3	0.0480696	1.59	Calreticulin/calnexin (AHRD V3.3 *** A0A118JZ09_CYNCS)
Solyc05g005670.1	0.0190655	1.58	U-box domain-containing protein 18 (AHRD V3.3 *** W9RKZ7_9ROSA)
Solyc04g076460.3	0.0209394	1.58	Leucine-rich repeat receptor-like protein kinase family protein (AHRD V3.3 *** AT4G08850.2)
Solyc10g083380.2	0.0238258	1.58	Calmodulin binding protein, putative (AHRD V3.3 *** B9T5N0_RICCO)
Solyc06g009940.1	0.026478	1.58	LOW QUALITY:Photosystem I P700 chlorophyll a apoprotein A1 (AHRD V3.3 *-* PSAA_ENCLE)
Solyc02g064720.3	0.0299804	1.58	phototropic-responsive NPH3 family protein
Solyc04g080270.3	0.03937	1.58	Cytochrome c oxidase subunit 3 (AHRD V3.3 *** A0A0B0MIX5_GOSAR)
Solyc02g092215.1	0.00837604	1.57	Galactosyl transferase GMA12/MNN10 family protein (AHRD V3.3 *** AT2G22900.1)
Solyc10g083670.2	0.0210216	1.57	Cellulose synthase-like protein (AHRD V3.3 *** L0ASI8_POPTO)
Solyc02g081420.3	0.0291995	1.57	P-loop containing nucleoside triphosphate hydrolases superfamily protein, putative (AHRD V3.3 *** A0A061EY56_THECC)
Solyc10g009350.3	0.0292236	1.57	MAP kinase kinase kinase 73
Solyc07g053230.3	0.0294253	1.57	R2R3MYB transcription factor 83
Solyc11g072580.2	0.0313565	1.57	Major facilitator superfamily protein (AHRD V3.3 *** AT3G45660.3)
Solyc03g007050.3	0.0134744	1.56	ERECTA-like 1 (AHRD V3.3 *** AT5G62230.1)
Solyc01g080150.3	0.0280138	1.56	tRNA dimethylallyltransferase
Solyc03g079880.3	0.0450499	1.56	Protease inhibitor/seed storage/lipid transfer family protein (AHRD V3.3 *** B9HHI8_POPTR)
Solyc12g013620.2	0.00539821	1.55	jasmonic acid 2
Solyc04g077490.3	0.0300113	1.55	AP2-like ethylene-responsive transcription factor (AHRD V3.3 *** A0A072VCJ1_MEDTR)
Solyc10g011700.3	0.0358059	1.55	RNA-binding KH domain-containing protein (AHRD V3.3 --* AT1G14170.3)
Solyc07g062685.1	0.0415662	1.55	Aspartyl/glutamyl-tRNA (Asn/Gln) amidotransferase subunit B (AHRD V3.3 *** A0A0B0PLB6_GOSAR)
Solyc11g073110.2	0.0194914	1.54	UPSTREAM OF FLC protein (DUF966) (AHRD V3.3 *** AT5G59790.1)
Solyc09g014990.3	0.0260257	1.54	WRKY transcription factor 33
Solyc08g014570.3	0.0285447	1.54	Ankyrin repeat family protein (AHRD V3.3 *** AT2G31820.1)
Solyc01g100460.3	0.0450814	1.54	BZIP transcription factor family protein (AHRD V3.3 *** B9GSS6_POPTR)
Solyc06g076270.3	0.0479347	1.54	Telomere-binding family protein (AHRD V3.3 *** B9HPG4_POPTR)
Solyc08g082210.3	0.00277825	1.53	AP2/EREBP transcription factor
Solyc08g079880.2	0.00507558	1.53	P69C protein
Solyc07g053590.3	0.0254243	1.53	NAC domain-containing protein (AHRD V3.3 *** A0A060A134_BOENI)
Solyc06g076253.1	0.029142	1.53	DCD (Development and cell death) domain protein (AHRD V3.3 *-* A0A072V4A1_MEDTR)
Solyc05g055650.3	0.0292117	1.53	Quinohemoprotein ethanol dehydrogenase type-1 (AHRD V3.3 *-* A0A0B2Q0Y5_GLYSO)
Solyc07g005770.2	0.0452599	1.53	LOW QUALITY:Disease resistance protein (AHRD V3.3 *** A0A118JXS4_CYNCS)
Solyc04g081900.3	0.00507769	1.52	Cysteine/Histidine-rich C1 domain family protein (AHRD V3.3 --* AT2G44380.1)
Solyc08g078670.2	0.015236	1.52	LOW QUALITY:Eukaryotic aspartyl protease family protein (AHRD V3.3 *** A0A061G3B8_THECC)
Solyc08g081420.3	0.0158248	1.52	transferring glycosyl group transferase (DUF604) (AHRD V3.3 *** AT5G41460.1)
Solyc11g005915.1	0.0295645	1.52	Maturase K (AHRD V3.3 --* MATK_HUPLU)
Solyc02g071800.3	0.0303934	1.52	Receptor-like protein kinase (AHRD V3.3 *** B9I1R1_POPTR)
Solyc12g096920.1	0.0353376	1.52	Disease resistance protein (CC-NBS-LRR class) family protein (AHRD V3.3 *** G7IID2_MEDTR)
Solyc06g065940.3	0.0468233	1.52	Far1-related sequence 6-like protein (AHRD V3.3 *-* A0A0B0MXF2_GOSAR)
Solyc03g123370.3	3.82303e-07	1.51	RelA/SpoT-like protein (AHRD V3.3 *** A8DD65_IPONI)
Solyc02g090190.1	0.00359362	1.51	Molybdenum cofactor sulfurase (AHRD V3.3 *** A0A0B2NTX1_GLYSO)
Solyc05g013850.2	0.00530116	1.51	Sieve element occlusion c (AHRD V3.3 *** E2FKK0_9SOLN)
Solyc04g078670.3	0.0211565	1.51	NAC domain protein (AHRD V3.3 *** S5RUW2_9ROSA)
Solyc08g067595.1	0.0295061	1.51	Ribonuclease H-like protein (AHRD V3.3 --* A0A061FNB8_THECC)
Solyc11g012240.1	0.0311475	1.51	MBOAT (membrane bound O-acyl transferase) family protein (AHRD V3.3 *** AT5G55350.1)
Solyc01g068260.3	0.0480714	1.51	BRCT domain-containing family protein (AHRD V3.3 *-* U5GIX9_POPTR)
Solyc04g015520.3	0.00925716	1.5	Remorin family protein (AHRD V3.3 *** A0A061F452_THECC)
Solyc04g080600.3	0.0142822	1.5	DnaJ domain-containing protein (AHRD V3.3 *-* A0A103XYN8_CYNCS)
Solyc02g081300.3	0.0189713	1.5	Sucrose synthase (AHRD V3.3 *** A0A0C5DIW2_CAMSI)
Solyc09g010917.1	0.0295102	1.5	F-box family protein (AHRD V3.3 --* A0A061G9M7_THECC)
Solyc04g005430.3	0.0126119	1.49	S-adenosyl-L-methionine-dependent methyltransferases superfamily protein (AHRD V3.3 *** AT1G78240.2)
Solyc01g005400.3	0.0148749	1.49	Caleosin-related family protein (AHRD V3.3 *** AT1G70670.1)
Solyc06g053710.3	0.0210185	1.49	ethylene receptor homolog (ETR4)
Solyc02g082150.1	0.029877	1.49	LOW QUALITY:root hair specific 4 (AHRD V3.3 *-* AT1G30850.1)
Solyc02g069987.1	0.0331558	1.49	Obg-like ATPase 1 (AHRD V3.3 --* B7FK99_MEDTR)
Solyc05g013400.3	0.0189544	1.48	Pentatricopeptide repeat superfamily protein, putative (AHRD V3.3 *** A0A061GR61_THECC)
Solyc04g072800.3	0.0198349	1.48	phosphoglycerate/bisphosphoglycerate mutase (AHRD V3.3 *** AT1G78050.1)
Solyc08g080220.2	0.0223801	1.48	DNA-directed RNA polymerase subunit (AHRD V3.3 *** A0A0V0J1K4_SOLCH)
Solyc12g017230.2	0.0231061	1.48	modifier of snc1 (AHRD V3.3 --* AT4G24680.5)
Solyc11g065770.1	0.0305985	1.48	Cytochrome P450, putative (AHRD V3.3 *** B9S4U7_RICCO)
Solyc02g079580.3	0.0413505	1.48	Serine/threonine-protein kinase (AHRD V3.3 *** M5WPV3_PRUPE)
Solyc12g088940.2	0.0194432	1.47	MAP kinase kinase kinase 87
Solyc01g066453.1	0.0208065	1.47	Epoxide hydrolase (AHRD V3.3 *-* S8E221_9LAMI)
Solyc05g054320.3	0.0210125	1.47	Epoxide hydrolase (AHRD V3.3 *** Q41413_SOLTU)
Solyc07g052790.2	0.0212458	1.47	disease resistance protein (TIR-NBS-LRR class) (AHRD V3.3 *** AT5G17680.2)
Solyc02g023950.3	0.0304161	1.47	Leucine-rich receptor-like protein kinase family protein (AHRD V3.3 *** AT4G20940.1)
Solyc06g053640.1	0.0396278	1.47	RING/U-box superfamily protein (AHRD V3.3 *** A0A061EMD3_THECC)
Solyc03g026280.3	0.0478664	1.47	CBF
Solyc01g105670.3	0.00814439	1.46	Calcium-dependent protein kinase (AHRD V3.3 *** G3M0D5_HEVBR)
Solyc01g108560.4	0.0191619	1.46	Acetyl esterase IPR013094 Alpha_beta hydrolase fold-3
Solyc03g097460.3	0.0204929	1.46	integrator complex subunit (AHRD V3.3 *** AT3G07530.3)
Solyc09g097920.2	0.0304494	1.46	Mitochondrial transcription termination factor family protein (AHRD V3.3 *** AT1G74120.1)
Solyc01g048590.2	0.0396142	1.46	LOW QUALITY:Photosystem II protein D1 (AHRD V3.3 *-* PSBA_CHLVU)
Solyc10g006960.2	0.0478461	1.46	RING/U-box superfamily protein (AHRD V3.3 *-* AT3G58030.4)
Solyc07g006760.3	0.0143808	1.45	MAP kinase kinase kinase 43
Solyc11g007770.2	0.0150924	1.45	Exostosin-2 (AHRD V3.3 *** A0A0B2S0C1_GLYSO)
Solyc03g078090.3	0.0190887	1.45	Pectinesterase (AHRD V3.3 *** K4BHN9_SOLLC)
Solyc09g048970.2	0.0227507	1.45	DNA-directed RNA polymerase II subunit RPB7 (AHRD V3.3 *-* A0A0B0PUV3_GOSAR)
Solyc09g007460.3	0.0288518	1.45	POLAR LOCALIZATION DURING ASYMMETRIC DIVISION AND protein (AHRD V3.3 *** AT3G09730.2)
Solyc08g008380.3	0.0298549	1.45	Auxin Response Factor 9B
Solyc03g116560.1	0.0303966	1.45	Pentatricopeptide repeat-containing family protein (AHRD V3.3 *** B9MU52_POPTR)
Solyc01g087450.3	0.0332889	1.45	Protein EFR3 B (AHRD V3.3 *** A0A1D1ZEH0_9ARAE)
Solyc02g069560.3	0.0423135	1.45	Protein CHUP1, chloroplastic-like protein (AHRD V3.3 *** A0A0B0NZW9_GOSAR)
Solyc04g025170.3	0.0427422	1.45	ABC transporter G family member (AHRD V3.3 *-* A0A0K9PAR3_ZOSMR)
Solyc09g010564.1	0.0470906	1.45	P-hydroxybenzoic acid efflux pump subunit aaeB (AHRD V3.3 *-* A0A061GW63_THECC)
Solyc09g007810.3	0.00483694	1.44	Auxin Response Factor 16A
Solyc11g066730.2	0.0171339	1.44	phototropic-responsive NPH3 family protein
Solyc09g066280.3	0.0194741	1.44	basic helix loop helix (bHLH) DNA-binding superfamily protein (AHRD V3.3 *** AT1G06150.1)
Solyc06g068370.3	0.0210237	1.44	disease resistance protein (TIR-NBS-LRR class) (AHRD V3.3 --* AT2G17050.3)
Solyc06g071750.3	0.0285499	1.44	Octicosapeptide/Phox/Bem1p domain-containing protein kinase (AHRD V3.3 *** A0A0K9NT10_ZOSMR)
Solyc10g084080.2	0.0301117	1.44	Pentatricopeptide repeat superfamily protein, putative (AHRD V3.3 *** A0A061F037_THECC)
Solyc01g098820.3	0.037493	1.44	Phototropic-responsive NPH3 family protein, putative (AHRD V3.3 *** A0A061FBG1_THECC)
Solyc05g052270.2	0.0088507	1.43	Non-specific serine/threonine protein kinase (AHRD V3.3 *** A0A0V0IJQ5_SOLCH)
Solyc09g005000.1	0.00913634	1.43	Clade VI lectin receptor kinase (AHRD V3.3 *** K4CPZ0_SOLLC)
Solyc03g121320.3	0.0127524	1.43	Tudor/PWWP/MBT superfamily protein (AHRD V3.3 *** A0A072TXL6_MEDTR)
Solyc09g007310.3	0.0189964	1.43	E3 ubiquitin-protein ligase (AHRD V3.3 *** A0A072VW29_MEDTR)
Solyc12g010740.2	0.0285465	1.43	Leucine-rich repeat receptor-like protein kinase (AHRD V3.3 *-* C0LGQ2_ARATH)
Solyc02g091710.3	0.0292908	1.43	Zinc finger (C3HC4-type RING finger) family protein (AHRD V3.3 *** AT5G49665.1)
Solyc09g007260.3	0.0295913	1.43	AP2-like ethylene-responsive transcription factor (AHRD V3.3 *** G7IU38_MEDTR)
Solyc12g038160.2	0.0300314	1.43	Lipase family protein (AHRD V3.3 *** B9I2Q8_POPTR)
Solyc10g009430.3	0.0303067	1.43	O-acyltransferase WSD1 (AHRD V3.3 *** W9R027_9ROSA)
Solyc04g081755.1	0.0412055	1.43	Lipase, GDSL (AHRD V3.3 *-* A0A103YES1_CYNCS)
Solyc06g035520.3	0.0491262	1.43	Gibberellin receptor GID1 (AHRD V3.3 *** A0A151RHF2_CAJCA)
Solyc01g073640.3	0.0156986	1.42	alcohol dehydrogenase-3,Pfam:PF13561
Solyc03g096880.3	0.0189819	1.42	Tudor/PWWP/MBT superfamily protein (AHRD V3.3 *** A0A0K9NN30_ZOSMR)
Solyc06g074070.3	0.019229	1.42	Receptor-kinase-like protein (AHRD V3.3 *** A0A072U3D4_MEDTR)
Solyc12g100030.2	0.0209581	1.42	LOW QUALITY:Leucine-rich-repeat receptor-like protein (AHRD V3.3 *** A0A097BR55_GOSBA)
Solyc10g085610.2	0.0295449	1.42	Calmodulin binding protein, putative (AHRD V3.3 *** B9T5N0_RICCO)
Solyc02g084540.3	0.0298882	1.42	Transmembrane and coiled-coil domain-containing protein 4 (AHRD V3.3 *** A0A151R318_CAJCA)
Solyc02g089480.1	0.0347104	1.42	Glutamine dumper 2, putative (AHRD V3.3 *** A0A061ENI6_THECC)
Solyc10g079320.2	0.0349025	1.42	Glycosyltransferase (AHRD V3.3 *** K4D2H3_SOLLC)
Solyc11g012590.2	0.0351272	1.42	CASP-like protein (AHRD V3.3 *** M1B0Y6_SOLTU)
Solyc03g033250.1	0.036602	1.42	LOW QUALITY:tracheary element differentiation-related 6 (AHRD V3.3 *** AT1G43790.1)
Solyc08g076730.3	0.00593558	1.41	Tetratricopeptide repeat (TPR)-like superfamily protein (AHRD V3.3 *** AT4G17940.1)
Solyc07g005860.3	0.00901176	1.41	QWRF motif protein (DUF566) (AHRD V3.3 *** AT4G30710.3)
Solyc04g056390.3	0.0145565	1.41	isopentenyl diphosphate isomerase
Solyc07g005840.2	0.0161142	1.41	Cellulose synthase (AHRD V3.3 *** M1ARZ5_SOLTU)
Solyc01g066430.3	0.0172264	1.41	RING/U-box superfamily protein (AHRD V3.3 *** AT2G47560.1)
Solyc07g040990.3	0.017885	1.41	Protein phosphatase 2C family protein (AHRD V3.3 *** AT5G57050.1)
Solyc01g007260.3	0.0189651	1.41	Double Clp-N motif-containing P-loop nucleoside triphosphate hydrolases superfamily protein (AHRD V3.3 *** A0A061ETP2_THECC)
Solyc10g076830.2	0.0200447	1.41	Laccase (AHRD V3.3 *** P93366_TOBAC)
Solyc01g106650.3	0.0458512	1.41	Xyloglucan endotransglucosylase/hydrolase (AHRD V3.3 *** K4B2N2_SOLLC)
Solyc01g008110.3	0.0128364	1.4	Cytochrome P450 (AHRD V3.3 *** A0A118JS81_CYNCS)
Solyc01g096190.3	0.0149113	1.4	Ca2+-ATPase
Solyc02g085010.1	0.0159594	1.4	histone-lysine N-methyltransferase, H3 lysine-9 specific SUVH3-like protein (AHRD V3.3 --* AT1G17770.1)
Solyc03g083510.3	0.0189611	1.4	Receptor-like kinase (AHRD V3.3 *** A0A191UPW4_CASSA)
Solyc05g006630.3	0.019143	1.4	disease resistance protein (TIR-NBS-LRR class) (AHRD V3.3 *** AT1G27180.8)
Solyc09g005630.3	0.0227516	1.4	trichome birefringence-like protein (DUF828) (AHRD V3.3 *** AT5G01360.1)
Solyc01g107940.3	0.0304782	1.4	RING/U-box superfamily protein (AHRD V3.3 *** AT2G15530.7)
Solyc09g089530.3	0.0356007	1.4	Proteinase inhibitor I (AHRD V3.3 *** Q3S492_SOLTU)
Solyc02g084370.1	0.0463465	1.4	Non-specific serine/threonine protein kinase (AHRD V3.3 *** K4BAV3_SOLLC)
Solyc07g064580.3	0.00524802	1.39	actin cytoskeleton-regulatory complex pan-like protein (AHRD V3.3 *** AT1G50660.1)
Solyc06g062780.3	0.0112755	1.39	Phospholipid-transporting ATPase (AHRD V3.3 *** A0A0V0IZF4_SOLCH)
Solyc04g015970.3	0.019032	1.39	ABC transporter family protein (AHRD V3.3 *** B9H9T2_POPTR)
Solyc07g062760.2	0.0224623	1.39	P-loop containing nucleoside triphosphate hydrolases superfamily protein, putative (AHRD V3.3 *** A0A061F6Y4_THECC)
Solyc01g100200.3	0.0225166	1.39	gras4
Solyc06g073110.3	0.0233666	1.39	DUF936 family protein (AHRD V3.3 *** G7JEV5_MEDTR)
Solyc02g092940.3	0.0115281	1.38	receptor-like kinase (AHRD V3.3 *** AT5G67280.1)
Solyc02g062375.1	0.0138431	1.38	Zinc finger CCCH domain-containing protein 44 (AHRD V3.3 *-* W9SN42_9ROSA)
Solyc09g008060.3	0.0209953	1.38	Glycosyltransferase (AHRD V3.3 *** K4CQJ5_SOLLC)
Solyc01g090860.3	0.0224424	1.38	Nucleotidyltransferase family protein (AHRD V3.3 *** AT4G00060.4)
Solyc01g107240.3	0.0225683	1.38	Peroxisomal membrane 22 kDa (Mpv17/PMP22) family protein (AHRD V3.3 *** AT4G33905.1)
Solyc02g072090.2	0.0228322	1.38	DNA polymerase III subunit gamma/tau (AHRD V3.3 *** A0A0B2ST31_GLYSO)
Solyc11g065930.2	0.0286213	1.38	Xanthine dehydrogenase (AHRD V3.3 *** H6UJ41_CAMSI)
Solyc01g112140.3	0.0293019	1.38	Flavin-containing monooxygenase (AHRD V3.3 *** M1B691_SOLTU)
Solyc07g049610.1	0.0296577	1.38	Xyloglucan galactosyltransferase KATAMARI1, putative (AHRD V3.3 *** B9R9L8_RICCO)
Solyc01g009220.3	0.0318571	1.38	Heat shock family protein (AHRD V3.3 *-* U5GG61_POPTR)
Solyc02g080120.2	0.0457954	1.38	Gibberellin 2-beta- dioxygenase 7
Solyc09g009550.3	0.0480528	1.38	Alpha/beta-Hydrolases superfamily protein (AHRD V3.3 *** A0A061ETT5_THECC)
Solyc02g083670.3	0.0159948	1.37	histidine kinase 1 (AHRD V3.3 *** AT2G17820.1)
Solyc11g044940.1	0.0160932	1.37	Kinase family protein (AHRD V3.3 *** A0A0K9P5Z4_ZOSMR)
Solyc04g008410.2	0.0218221	1.37	Pentatricopeptide repeat (PPR) superfamily protein (AHRD V3.3 *** AT1G03100.1)
Solyc09g091270.2	0.0228876	1.37	cotton fiber protein (AHRD V3.3 *** AT5G13880.2)
Solyc10g085070.2	0.0230108	1.37	UPF0503 protein, chloroplastic (AHRD V3.3 *** A0A199UN58_ANACO)
Solyc02g063330.3	0.028545	1.37	Kinase family protein (AHRD V3.3 *** B9H386_POPTR)
Solyc01g080260.3	0.0300032	1.37	ARM repeat superfamily protein (AHRD V3.3 *** AT5G18980.1)
Solyc08g078040.3	0.0304572	1.37	FAD/NAD(P)-binding oxidoreductase family protein (AHRD V3.3 *** AT2G35660.1)
Solyc09g092430.3	0.01442	1.36	Selenium binding family protein (AHRD V3.3 *** B9GFI5_POPTR)
Solyc01g098010.3	0.0210846	1.36	Acetyltransferase (GNAT) domain protein (AHRD V3.3 *** G7L0S4_MEDTR)
Solyc00g126010.1	0.0284038	1.36	LOW protein: NADH-ubiquinone oxidoreductase chain-like protein (AHRD V3.3 *-* ATMG01330.1)
Solyc04g014830.2	0.0291696	1.36	GRAS family transcription factor (AHRD V3.3 *** G7JLR5_MEDTR)
Solyc05g055540.2	0.0414203	1.36	Major facilitator superfamily protein (AHRD V3.3 *** AT2G39210.1)
Solyc12g006790.2	0.0418806	1.36	Argonaute10b
Solyc03g058910.3	0.0482525	1.36	Pectate lyase (AHRD V3.3 *** M1A3P9_SOLTU)
Solyc03g121960.3	0.00882923	1.35	phospholipid:diacylglycerol acyltransferase (AHRD V3.3 *** AT5G13640.1)
Solyc01g086810.2	0.00980143	1.35	NBS-LRR disease resistance protein (AHRD V3.3 *** G7IVT3_MEDTR)
Solyc03g122340.3	0.0108879	1.35	lipoxygenase D
Solyc05g015510.3	0.0135233	1.35	Squamosa promoter-binding protein 10
Solyc06g051540.3	0.0192348	1.35	Serine/threonine-protein kinase (AHRD V3.3 *** W0TR71_ACAMN)
Solyc01g068140.3	0.0232271	1.35	Transferase family protein (AHRD V3.3 *** B9I9B9_POPTR)
Solyc06g036060.3	0.029985	1.35	Zinc finger, C2H2 (AHRD V3.3 *-* A0A103YJ68_CYNCS)
Solyc04g007580.1	0.0304966	1.35	LOW QUALITY:DUF4228 domain protein (AHRD V3.3 *** G7IAV0_MEDTR)
Solyc08g083315.1	0.0309061	1.35	50S ribosomal protein L16, chloroplastic (AHRD V3.3 --* RK16_PHAVU)
Solyc11g016930.1	0.0349049	1.35	Leucine-rich repeat receptor-like protein kinase (AHRD V3.3 *-* C0LGE9_ARATH)
Solyc12g089143.1	0.00648323	1.34	shaggy-like kinase 42 (AHRD V3.3 --* AT1G57870.4)
Solyc02g091660.3	0.012475	1.34	Transcription factor GTE4 (AHRD V3.3 *** A0A0B2QCM2_GLYSO)
Solyc12g098380.2	0.0156675	1.34	zein-binding protein (Protein of unknown function, DUF593) (AHRD V3.3 *-* AT4G13630.2)
Solyc11g012510.2	0.0209981	1.34	GRAS1
Solyc10g085870.1	0.0210238	1.34	Glycosyltransferase (AHRD V3.3 *** M1BFM3_SOLTU)
Solyc03g117520.2	0.0213144	1.34	Protein FAR1-RELATED SEQUENCE 6 (AHRD V3.3 *** W9R3Q8_9ROSA)
Solyc01g097320.3	0.022371	1.34	Mediator of RNA polymerase II transcription subunit 14 (AHRD V3.3 *** A0A061F303_THECC)
Solyc07g043620.3	0.0240753	1.34	Auxin Response Factor 6B
Solyc06g082440.1	0.02912	1.34	Non-specific serine/threonine protein kinase (AHRD V3.3 *** K4CAA3_SOLLC)
Solyc09g007535.1	0.0300366	1.34	chromatin remodeling 38 (AHRD V3.3 --* AT3G42670.4)
Solyc05g053570.3	0.0304579	1.34	Pleiotropic drug resistance ABC transporter (AHRD V3.3 *** W0TUG3_ACAMN)
Solyc02g092600.3	0.0315299	1.34	Phototropic-responsive NPH3 family protein (AHRD V3.3 *-* A0A061DGZ5_THECC)
Solyc06g071350.3	0.0102965	1.33	BAH domain-containing protein, putative (AHRD V3.3 *** Q53J12_SOLLC)
Solyc09g082370.3	0.0190282	1.33	Type I inositol-1,4,5-trisphosphate 5-phosphatase CVP2 (AHRD V3.3 *** W9RZ96_9ROSA)
Solyc05g013410.3	0.0263651	1.33	F-box family protein (AHRD V3.3 *** AT1G70590.1)
Solyc03g082550.3	0.0285751	1.33	Homeobox leucine zipper (AHRD V3.3 *-* J7FWS7_ROSRU)
Solyc09g007900.3	0.0303645	1.33	Phenylalanine ammonia-lyase (AHRD V3.3 *** A0A124SBF6_CYNCS)
Solyc01g112070.3	0.0304619	1.33	O-fucosyltransferase family protein (AHRD V3.3 *** AT1G20550.1)
Solyc09g065760.3	0.0307432	1.33	DUF506 family protein (AHRD V3.3 *** G7ICN8_MEDTR)
Solyc03g025613.1	0.0348079	1.33	Tripeptidyl-peptidase 2 (AHRD V3.3 *-* A0A0B0NVF8_GOSAR)
Solyc11g013480.2	0.0355932	1.33	Auxin Response Factor 17
Solyc08g081840.3	0.0359507	1.33	BTB/POZ domain-containing POB1-like protein (AHRD V3.3 *** A0A0B0N127_GOSAR)
Solyc02g092620.3	0.0387072	1.33	Phototropic-responsive NPH3 family protein (AHRD V3.3 *-* A0A061DGZ5_THECC)
Solyc04g007290.3	0.0447315	1.33	DUF639 family protein (AHRD V3.3 *** G7L0J4_MEDTR)
Solyc01g099330.3	0.0479329	1.33	S-adenosyl-L-methionine-dependent methyltransferases superfamily protein (AHRD V3.3 *** AT4G01240.1)
Solyc03g121880.3	0.00171794	1.32	Protein phosphatase 2c, putative (AHRD V3.3 *** B9S5U9_RICCO)
Solyc04g080280.3	0.00634072	1.32	Lung seven transmembrane receptor family protein (AHRD V3.3 --* AT5G18520.1)
Solyc12g096020.2	0.0087352	1.32	Protein phosphatase 2c (AHRD V3.3 *** F8WL78_CITUN)
Solyc05g055070.3	0.0122604	1.32	Ethylene receptor homolog (AHRD V3.3 *** Q9XET9_SOLLC)
Solyc01g005000.3	0.0157227	1.32	Glutamate decarboxylase (AHRD V3.3 *** B1Q3F2_SOLLC)
Solyc09g015670.3	0.0162174	1.32	Vacuolar sorting receptor family protein (AHRD V3.3 *** B9HDJ2_POPTR)
Solyc09g065240.3	0.0270099	1.32	Patatin (AHRD V3.3 *** K4CUF1_SOLLC)
Solyc07g065985.1	0.0286529	1.32	Oleosin (AHRD V3.3 *-* A0A103Y4G9_CYNCS)
Solyc10g055730.2	0.0290818	1.32	HXXXD-type acyl-transferase family protein, putative (AHRD V3.3 *-* A0A061DGL0_THECC)
Solyc01g079410.3	0.0293538	1.32	Calcium-dependent phosphotriesterase superfamily protein (AHRD V3.3 *** A0A061DRE0_THECC)
Solyc01g066570.3	0.0329042	1.32	senescence-associated family protein (DUF581) (AHRD V3.3 *** AT1G22160.1)
Solyc02g072560.1	0.0353175	1.32	LOW QUALITY:transcription factor-like protein (AHRD V3.3 *** AT3G14880.2)
Solyc03g116920.2	0.041027	1.32	Sister chromatid cohesion protein PDS5 like B-B (AHRD V3.3 *-* A0A0B2PCJ8_GLYSO)
Solyc11g011000.2	0.0466937	1.32	Cysteine-rich repeat secretory protein 60 (AHRD V3.3 *** A0A061EEI8_THECC)
Solyc12g019480.2	0.0480214	1.32	Formin-like protein (AHRD V3.3 *** K4DDH4_SOLLC)
Solyc07g053740.1	0	1.31	Ethylene Response Factor F.4
Solyc07g052320.3	0.0124434	1.31	Hexosyltransferase (AHRD V3.3 *** K4CFD1_SOLLC)
Solyc04g080290.3	0.0136247	1.31	Sec14p-like phosphatidylinositol transfer family protein (AHRD V3.3 *** AT1G75170.2)
Solyc10g086430.2	0.0189767	1.31	Transducin/WD-like repeat-protein (AHRD V3.3 *** G7L3F0_MEDTR)
Solyc12g016220.2	0.0211127	1.31	Pvr4 (AHRD V3.3 *-* A0A1D5AHY8_CAPAN)
Solyc02g079590.3	0.0286698	1.31	Serine/threonine-protein kinase (AHRD V3.3 *** M1A226_SOLTU)
Solyc09g014240.3	0.0295518	1.31	Laccase (AHRD V3.3 *** P93366_TOBAC)
Solyc06g008300.3	0.0296858	1.31	Leucine-rich repeat receptor-like protein kinase family protein (AHRD V3.3 *** AT4G08850.1)
Solyc09g005480.3	0.0299542	1.31	F-box family protein, putative (AHRD V3.3 *** A0A061GHK4_THECC)
Solyc03g025923.1	0.0301817	1.31	Membrane steroid-binding 2-like protein (AHRD V3.3 --* A0A0B0NCY7_GOSAR)
Solyc06g074240.2	0.0337657	1.31	Beta-carotene
Solyc04g016177.1	0.034859	1.31	Glycosyltransferase (AHRD V3.3 *** M1CLQ4_SOLTU)
Solyc11g007600.2	0.0373861	1.31	Cellulose synthase-like protein (AHRD V3.3 *** L0ASI8_POPTO)
Solyc06g082170.2	0.0488532	1.31	LOW QUALITY:Glutaredoxin family protein, putative (AHRD V3.3 *** A0A061GYL6_THECC)
Solyc03g097370.3	9.99201e-15	1.3	DNA-binding SMUBP-2 (AHRD V3.3 *** A0A0B0N417_GOSAR)
Solyc04g057930.3	0.0070867	1.3	Kinase family protein (AHRD V3.3 *** B9H7J5_POPTR)
Solyc02g092930.1	0.0113527	1.3	R2R3MYB transcription factor 44
Solyc05g052350.3	0.0136813	1.3	Receptor-like kinase (AHRD V3.3 *** C0SW26_SOYBN)
Solyc01g094640.3	0.0169759	1.3	Phosphatidylinositol N-acetyglucosaminlytransferase subunit P-like protein (AHRD V3.3 *** A0A072TN99_MEDTR)
Solyc11g013830.2	0.0190598	1.3	1-phosphatidylinositol-3-phosphate 5-kinase (AHRD V3.3 *** W9QXB1_9ROSA)
Solyc09g082830.3	0.0206576	1.3	Argonaute 10a
Solyc01g065500.3	0.0240259	1.3	C2 calcium/lipid-binding plant phosphoribosyltransferase family protein (AHRD V3.3 *** AT5G17980.1)
Solyc06g072830.3	0.029207	1.3	WD40 repeat-containing protein (AHRD V3.3 *** A0A103YEC3_CYNCS)
Solyc05g006770.3	0.029936	1.3	Kinase, putative (AHRD V3.3 *** A0A061E6J7_THECC)
Solyc06g052050.3	0.0350054	1.3	Heat shock protein 70 (AHRD V3.3 *** Q9M4E8_CUCSA)
Solyc12g099900.1	0.0358607	1.3	SCL3 (scarecrow-like 3)
Solyc04g014500.3	0.00473992	1.29	Nudix hydrolase-like protein (AHRD V3.3 *** G7J9C3_MEDTR)
Solyc09g007870.3	0.00510716	1.29	ethylene signaling protein
Solyc01g006400.3	0.00999636	1.29	Extensin-like protein (AHRD V3.3 *** O49946_SOLTU)
Solyc04g015360.3	0.0161752	1.29	GATA transcription factor (AHRD V3.3 *** K4BQ39_SOLLC)
Solyc03g119305.1	0.0189862	1.29	zinc finger protein-like protein (AHRD V3.3 *** AT3G18290.1)
Solyc06g076020.3	0.0191259	1.29	heat shock protein 70 kD
Solyc11g067070.1	0.0210456	1.29	Protein kinase (AHRD V3.3 *** A7VL53_WHEAT)
Solyc01g109200.3	0.0211434	1.29	RING/U-box superfamily protein (AHRD V3.3 *** A0A061DYT2_THECC)
Solyc01g113620.2	0.0287703	1.29	Disease resistance protein (TIR-NBS-LRR class) family (AHRD V3.3 *** AT5G36930.4)
Solyc08g079640.2	0.0318754	1.29	Pentatricopeptide repeat-containing protein (AHRD V3.3 *-* A0A103XK68_CYNCS)
Solyc05g009875.1	0.0355075	1.29	Transmembrane Fragile-X-F-associated protein (AHRD V3.3 *-* AT1G68820.4)
Solyc02g070440.3	0.014486	1.28	Katanin p60 ATPase-containing subunit, putative (AHRD V3.3 *** B9S114_RICCO)
Solyc01g058260.3	0.0213917	1.28	Poly(A) polymerase, putative (AHRD V3.3 *** B9RZU0_RICCO)
Solyc09g061890.3	0.0235221	1.28	Pectate lyase (AHRD V3.3 *** M1BAL5_SOLTU)
Solyc07g062310.3	0.0289382	1.28	UNE1-like protein (AHRD V3.3 *** G7ITF5_MEDTR)
Solyc08g061980.3	0.030523	1.28	Mechanosensitive ion channel family protein (AHRD V3.3 *** G7J8E6_MEDTR)
Solyc01g100240.3	0.0343017	1.28	Calmodulin-binding protein (AHRD V3.3 *** AT2G18750.3)
Solyc07g063260.3	0.034994	1.28	MLO-like protein (AHRD V3.3 *** K4CH09_SOLLC)
Solyc04g076660.3	0.035615	1.28	Rhamnogalacturonate lyase (AHRD V3.3 *** A0A151RUN0_CAJCA)
Solyc03g117547.1	0.0409544	1.28	ABC transporter family protein (AHRD V3.3 *** A0A097P9P6_HEVBR)
Solyc06g069693.1	0.04536	1.28	Timing of CAB expression 1 (AHRD V3.3 *-* A0A097I4Y0_9ROSI)
Solyc06g062400.2	0.0192189	1.27	Protein CHUP1, chloroplastic (AHRD V3.3 *** A0A0B2RCB9_GLYSO)
Solyc06g082520.3	0.0207915	1.27	B3 domain-containing protein (AHRD V3.3 *** W9SAB7_9ROSA)
Solyc03g005060.3	0.0213442	1.27	nucleolar protein gar2-like protein (AHRD V3.3 *-* AT2G42320.2)
Solyc08g006170.1	0.0239462	1.27	Pentatricopeptide repeat-containing protein (AHRD V3.3 *** A0A118K1X6_CYNCS)
Solyc11g010170.2	0.0244648	1.27	LanC-like protein 2 (AHRD V3.3 *** A0A0B0NZR1_GOSAR)
Solyc09g016935.1	0.0296004	1.27	SH2 domain protein B (AHRD V3.3 --* AT1G78540.3)
Solyc06g008230.3	0.0303851	1.27	Tetratricopeptide repeat 7A (AHRD V3.3 *** A0A0B0PQU8_GOSAR)
Solyc07g066480.3	0.0367162	1.27	flacca
Solyc08g023490.3	0.0391985	1.27	Pentatricopeptide repeat-containing protein, putative (AHRD V3.3 *** B9SZL2_RICCO)
Solyc07g017680.2	0.0468227	1.27	Lysine-ketoglutarate reductase/saccharopine dehydrogenase (AHRD V3.3 *-* A0A072V2T5_MEDTR)
Solyc07g045570.2	0.0487899	1.27	Filament-plant-like protein (AHRD V3.3 *-* A0A072VFI4_MEDTR)
Solyc03g111797.1	0.00599852	1.26	Sieve element occlusion a (AHRD V3.3 *** E2FKJ8_9SOLN)
Solyc04g058140.3	0.00661336	1.26	GTPase obg (AHRD V3.3 *** A0A1D1XZG9_9ARAE)
Solyc01g079150.3	0.0125572	1.26	Boron transporter (AHRD V3.3 *** B6V758_VITVI)
Solyc03g114360.3	0.0127615	1.26	Poly [ADP-ribose] polymerase (AHRD V3.3 *** A0A067K7U4_JATCU)
Solyc10g074810.2	0.0211748	1.26	RING/U-box superfamily protein (AHRD V3.3 *** AT5G01960.1)
Solyc09g074670.3	0.0211877	1.26	Zinc finger, CW-type (AHRD V3.3 *** A0A103YNR4_CYNCS)
Solyc08g081890.3	0.0226565	1.26	ABC transporter family protein (AHRD V3.3 *** U5FPJ5_POPTR)
Solyc03g114850.3	0.0227056	1.26	Squamosa promoter binding protein 6a
Solyc06g048620.3	0.0233761	1.26	Leucine-rich receptor-like kinase family protein (AHRD V3.3 *** A0A072V1G8_MEDTR)
Solyc07g006890.1	0.0244567	1.26	Cytochrome P450, putative (AHRD V3.3 *** B9S4U5_RICCO)
Solyc06g082080.3	0.0282689	1.26	Protein phosphatase 2C (AHRD V3.3 *** Q3V656_SOLTU)
Solyc10g086600.2	0.0285631	1.26	Subtilisin-like protease (AHRD V3.3 *-* W9RLB7_9ROSA)
Solyc03g117820.1	0.0285945	1.26	Transcriptional adapter 1 (AHRD V3.3 *** A0A0B0NYM8_GOSAR)
Solyc06g050800.3	0.0287277	1.26	Amino acid transporter family protein (AHRD V3.3 *** B9HYI5_POPTR)
Solyc01g096940.3	0.0296135	1.26	Receptor-like kinase 17 (AHRD V3.3 *** A5A0Y6_SOLCH)
Solyc06g051390.3	0.0300497	1.26	transducin family protein / WD-40 repeat family protein (AHRD V3.3 *** AT5G05570.2)
Solyc09g089580.3	0.0304019	1.26	2-oxoglutarate (2OG) and Fe(II)-dependent oxygenase superfamily protein (AHRD V3.3 *** AT1G06620.1)
Solyc12g011170.2	0.0326255	1.26	Phospholipase D (AHRD V3.3 *** M1AD93_SOLTU)
Solyc12g009040.2	0.0335699	1.26	Long chain acyl-CoA synthetase (AHRD V3.3 *** Q5W6W7_ORYSJ)
Solyc11g005640.2	0.0371328	1.26	Polyubiquitin (AHRD V3.3 *-* UBI2P_PETCR)
Solyc03g093110.3	0.0376935	1.26	xyloglucan endotransglucosylase-hydrolase
Solyc06g062905.1	0.0396002	1.26	global transcription factor group E8 (AHRD V3.3 --* AT3G27260.4)
Solyc09g009410.3	0.0409622	1.26	Transducin/WD40 repeat-like superfamily protein (AHRD V3.3 *** AT2G26060.1)
Solyc03g044020.3	0.0467442	1.26	Condensin-2 complex subunit G2, putative (AHRD V3.3 *** G7K2J6_MEDTR)
Solyc04g078420.1	0.0091557	1.25	R2R3MYB transcription factor 70
Solyc08g079545.1	0.0122563	1.25	F5O11.10 isoform 1 (AHRD V3.3 *** A0A061G506_THECC)
Solyc07g043590.3	0.0171462	1.25	Amine oxidase, putative (AHRD V3.3 *** B9S6G9_RICCO)
Solyc09g005200.3	0.0189689	1.25	ubiquitin carboxyl-terminal hydrolase (AHRD V3.3 *** AT1G65295.1)
Solyc12g042077.1	0.0189749	1.25	Auxin response factor (AHRD V3.3 *** K4DF01_SOLLC)
Solyc03g119640.3	0.0210222	1.25	Aluminum-activated malate transporter-like (AHRD V3.3 *** K4BMB3_SOLLC)
Solyc04g050565.1	0.0212881	1.25	OSBP(oxysterol binding protein)-related protein 2A (AHRD V3.3 --* AT4G22540.6)
Solyc02g089120.3	0.0225554	1.25	Protein COBRA (AHRD V3.3 *-* A0A151S444_CAJCA)
Solyc12g044840.2	0.0230169	1.25	Kinase family protein (AHRD V3.3 *** U5GQI1_POPTR)
Solyc10g049890.2	0.0246402	1.25	D-3-phosphoglycerate dehydrogenase (AHRD V3.3 *** K4D0E5_SOLLC)
Solyc10g005000.3	0.0267768	1.25	SUN-like protein 27
Solyc07g056470.3	0.0288677	1.25	Glutathione S-transferase-like protein (AHRD V1 **** Q8GVD1_SOLLC)
Solyc05g023767.1	0.0300084	1.25	coiled-coil protein (AHRD V3.3 *-* AT3G48860.1)
Solyc03g117840.3	0.0300615	1.25	Negative regulator of sporulation MDS3 (AHRD V3.3 *** A0A0B0N6H6_GOSAR)
Solyc12g056930.2	0.0303314	1.25	sulfate transporter 2
Solyc03g117610.1	0.0470144	1.25	Guanine nucleotide-binding alpha-16 subunit (AHRD V3.3 -** A0A0B0PFI0_GOSAR)
Solyc01g087170.3	0.00255165	1.24	Zinc finger transcription factor 11
Solyc03g113270.3	0.00277487	1.24	LEVAHOX1G L.esculentum homeobox
Solyc03g113190.1	0.00589782	1.24	C2 calcium/lipid-binding plant phosphoribosyltransferase family protein (AHRD V3.3 *** AT1G74720.1)
Solyc02g090160.3	0.0120195	1.24	Guanine nucleotide-binding protein alpha-2 subunit (AHRD V3.3 *** W9QPE6_9ROSA)
Solyc07g017610.3	0.0149012	1.24	Lysine-ketoglutarate reductase/saccharopine dehydrogenase (AHRD V3.3 *** G7JS28_MEDTR)
Solyc12g099260.2	0.0190083	1.24	ATP-citrate synthase, putative (AHRD V3.3 *** B9RZR0_RICCO)
Solyc01g111610.3	0.0227594	1.24	SBP (S-ribonuclease binding protein) family protein (AHRD V3.3 *** AT4G35070.1)
Solyc08g079740.3	0.0230352	1.24	Leucine-rich receptor-like protein kinase family protein (AHRD V3.3 *** A0A0K9NNG1_ZOSMR)
Solyc05g016120.2	0.0238325	1.24	Photosystem II protein D1 (AHRD V3.3 *-* PSBA_BARVE)
Solyc04g079845.1	0.0265506	1.24	Protein DA1-related 1 (AHRD V3.3 *-* A0A1D1YPA3_9ARAE)
Solyc07g053200.3	0.0298952	1.24	Adenine nucleotide alpha hydrolases-like superfamily protein (AHRD V3.3 *** AT1G11360.4)
Solyc09g075730.3	0.0341442	1.24	Leucine-rich repeat family protein / protein kinase family protein (AHRD V3.3 *** A0A0K9PIB6_ZOSMR)
Solyc03g083480.3	0.0342237	1.24	Membrane receptor-like protein 1 (AHRD V3.3 *** B3TJG2_CAPAN)
Solyc06g054625.1	0.0414801	1.24	Zinc finger CCCH domain-containing protein 32 (AHRD V3.3 *-* A0A151STD4_CAJCA)
Solyc10g017890.1	0.0478566	1.24	Photosystem I P700 chlorophyll a apoprotein A1 (AHRD V3.3 *-* PSAA_POPAL)
Solyc06g072710.3	0.00373948	1.23	Sigma factor (AHRD V3.3 *** Q9SLX3_TOBAC)
Solyc07g017510.3	0.00651892	1.23	1-phosphatidylinositol-3-phosphate 5-kinase (AHRD V3.3 *** W9RVS2_9ROSA)
Solyc02g072520.3	0.00751972	1.23	Receptor kinase, putative (AHRD V3.3 *** A0A061GFM9_THECC)
Solyc12g044200.2	0.0199026	1.23	Disease resistance protein (CC-NBS-LRR class) family protein (AHRD V3.3 *** A0A072VNI6_MEDTR)
Solyc12g014130.2	0.0233562	1.23	SUN-like protein 33
Solyc01g099980.3	0.0252183	1.23	enolase (DUF1399) (AHRD V3.3 *** AT1G56230.1)
Solyc08g066660.1	0.030011	1.23	Ethylene-responsive transcription factor TINY (AHRD V3.3 *** TINY_ARATH)
Solyc10g084340.2	0.034926	1.23	AP2-like ethylene-responsive transcription factor (AHRD V3.3 *** A0A072VME8_MEDTR)
Solyc04g064850.3	0.0349457	1.23	Organic solute transporter ostalpha protein (AHRD V3.3 *** A0A072V0U4_MEDTR)
Solyc04g015750.3	0	1.22	Magnesium chelatase H subunit (AHRD V3.3 *** F8SPG3_CAMSI)
Solyc07g064240.3	0.00520591	1.22	Early nodulin-like protein (AHRD V3.3 *** A0A072VAV5_MEDTR)
Solyc03g095650.3	0.0196995	1.22	MLO-like protein (AHRD V3.3 *** K4BIY8_SOLLC)
Solyc07g043240.3	0.0197288	1.22	Pectinesterase (AHRD V3.3 *** K4CEI4_SOLLC)
Solyc01g095460.3	0.0210102	1.22	TAF-2 (AHRD V3.3 *** Q40586_TOBAC)
Solyc09g011370.2	0.0226811	1.22	F-box family protein (AHRD V3.3 *** B9IJF9_POPTR)
Solyc07g053010.2	0.0230068	1.22	NBS-LRR type disease resistance protein (AHRD V3.3 *** Q19PJ0_POPTR)
Solyc03g115070.1	0.026605	1.22	LOW QUALITY:Exocyst subunit EXO70 family protein (AHRD V3.3 *** B9IK79_POPTR)
Solyc03g113520.3	0.0290939	1.22	Galactosyltransferase family protein (AHRD V3.3 *** AT5G62620.1)
Solyc07g062520.3	0.0292556	1.22	Cytochrome P450 72A15 (AHRD V3.3 *** A0A199W4R2_ANACO)
Solyc02g070040.1	0.029851	1.22	LOW QUALITY:Ethylene-responsive nuclear protein (AHRD V3.3 *** Q38MV1_SOLLC)
Solyc03g005380.3	0.0299533	1.22	Protein transport protein sec23, putative (AHRD V3.3 *** B9RTF3_RICCO)
Solyc11g065820.2	0.0305298	1.22	Protein DETOXIFICATION (AHRD V3.3 *** K4D9J2_SOLLC)
Solyc07g047620.2	0.0349548	1.22	Pentatricopeptide repeat-containing protein, putative (AHRD V3.3 *** B9SW54_RICCO)
Solyc07g007200.3	0.0429983	1.22	Ring finger protein, putative (AHRD V3.3 *** B9T2M9_RICCO)
Solyc01g080770.3	0.0129838	1.21	Non-specific serine/threonine protein kinase (AHRD V3.3 *** K4AXX0_SOLLC)
Solyc01g109300.3	0.0138355	1.21	4-hydroxy-3-methylbut-2-enyl diphosphate reductase
Solyc04g008295.1	0.0148435	1.21	Protein kinase superfamily protein (AHRD V3.3 *** AT1G65950.1)
Solyc03g007180.1	0.0191414	1.21	F5O11.10, putative isoform 1 (AHRD V3.3 *** A0A061G0M8_THECC)
Solyc01g104540.3	0.0195747	1.21	C-jun-amino-terminal kinase-interacting protein 3, putative (AHRD V3.3 *** A0A061FHN5_THECC)
Solyc01g108570.3	0.0197561	1.21	Gibberellin receptor GID1L2 IPR013094 Alpha_beta hydrolase fold-3
Solyc02g080520.3	0.0207818	1.21	F11F12.2 protein (AHRD V3.3 *** Q9LPT5_ARATH)
Solyc10g085920.2	0.0217445	1.21	UDP-glucuronate decarboxylase protein 1 (AHRD V3.3 *** N0A9W0_POPTO)
Solyc02g068560.3	0.0229404	1.21	CHD3-type chromatin-remodeling factor PICKLE (AHRD V3.3 *** A0A142CD29_9LAMI)
Solyc07g006020.3	0.0285637	1.21	ADIPOR-like receptor (AHRD V3.3 *** W9QY38_9ROSA)
Solyc10g084250.1	0.0288854	1.21	clade VIII lectin receptor kinase
Solyc01g091230.3	0.0295742	1.21	Receptor-like kinase (AHRD V3.3 *** A0A191UPW4_CASSA)
Solyc06g050920.3	0.0296736	1.21	Trichome birefringence-like protein (AHRD V3.3 *** G7K771_MEDTR)
Solyc09g014410.3	0.0299473	1.21	Serinc-domain containing serine and sphingolipid biosynthesis protein (AHRD V3.3 --* AT2G33205.6)
Solyc12g008660.1	0.0304723	1.21	Zinc finger transcription factor 73
Solyc09g014530.3	0.0315198	1.21	MLP (AHRD V3.3 *** G8DRV9_GOSBA)
Solyc01g106350.3	0.0346865	1.21	fatty acid amide hydrolase (AHRD V3.3 *** AT5G64440.1)
Solyc00g230080.1	0.0349498	1.21	LOW QUALITY:Photosystem II D2 protein (AHRD V3.3 *-* PSBD_PLETE)
Solyc10g009020.3	0.0351166	1.21	RING finger protein (AHRD V3.3 *** A0A0B0PIZ1_GOSAR)
Solyc04g082090.3	0.0365444	1.21	Alpha-amylase (AHRD V3.3 *** K4BVT6_SOLLC)
Solyc08g082270.3	0.0422768	1.21	Leucine-rich repeat (LRR) family protein (AHRD V3.3 *** AT4G23840.1)
Solyc03g082620.3	0.0125606	1.2	Yellow stripe 1A transporter (AHRD V3.3 *** A0A0K9P9K5_ZOSMR)
Solyc08g075530.3	0.0131322	1.2	Alpha glucosidase-like protein (AHRD V3.3 *** Q93Y12_ARATH)
Solyc04g082400.3	0.0134031	1.2	Starch branching enzyme (AHRD V3.3 *** A0A0F7R6Z9_AMAHP)
Solyc04g063380.3	0.0136963	1.2	F-box family protein (AHRD V3.3 *** B9H7L8_POPTR)
Solyc07g063950.3	0.0191806	1.2	calcium/calmodulin-regulated receptor-like kinase
Solyc02g085120.3	0.0215945	1.2	Laccase (AHRD V3.3 *** I1LHT8_SOYBN)
Solyc09g072820.3	0.0226808	1.2	Cellulose synthase (AHRD V3.3 *** M5VVD4_PRUPE)
Solyc05g023763.1	0.0287622	1.2	coiled-coil protein (AHRD V3.3 *-* AT5G23700.3)
Solyc07g045100.1	0.0294923	1.2	LOW QUALITY:Eukaryotic aspartyl protease family protein (AHRD V3.3 *** AT3G59080.1)
Solyc04g080640.1	0.030812	1.2	LOW QUALITY:Transmembrane protein, putative (AHRD V3.3 *** A0A072TTD0_MEDTR)
Solyc02g087350.2	0.0309555	1.2	Hexosyltransferase (AHRD V3.3 *** K4BBP2_SOLLC)
Solyc05g014100.2	0.0315511	1.2	F-box family protein (AHRD V3.3 --* AT3G06240.1)
Solyc07g006110.3	0.0319046	1.2	Leucine-rich repeat protein kinase family protein (AHRD V3.3 *** AT2G23950.1)
Solyc01g108410.2	0.0355548	1.2	Pentatricopeptide repeat-containing protein (AHRD V3.3 *** A0A103XM66_CYNCS)
Solyc06g054470.1	0.0381809	1.2	LOW QUALITY:Polynucleotidyl transferase, ribonuclease H fold protein with HRDC domain-containing protein (AHRD V3.3 --* AT2G32415.3)
Solyc06g062950.1	0.00596091	1.19	Subtilisin-like protease (AHRD V3.3 *** W9SXT6_9ROSA)
Solyc12g006920.2	0.008219	1.19	Serine/threonine protein phosphatase 2A regulatory subunit B (AHRD V3.3 *** B9HTC9_POPTR)
Solyc09g005080.1	0.0146921	1.19	verticillium wilt disease resistance 2
Solyc06g082480.3	0.0197372	1.19	Mitogen-activated protein kinase (AHRD V3.3 *-* Q6EIX6_TOBAC)
Solyc01g110290.3	0.0209982	1.19	Squalene synthase (AHRD V3.3 *** D0VFU8_SOLLC)
Solyc05g051460.3	0.0222093	1.19	Homeobox associated leucine zipper protein (AHRD V3.3 *** A0A072TTL6_MEDTR)
Solyc09g089860.3	0.0227392	1.19	WAT1-related protein (AHRD V3.3 *** K4CW12_SOLLC)
Solyc03g119920.1	0.0227738	1.19	LOW QUALITY:Cytochrome b559 subunit alpha (AHRD V3.3 --* PSBE_ADICA)
Solyc12g056560.2	0.0286184	1.19	Heat shock family protein (AHRD V3.3 *-* B9GTI4_POPTR)
Solyc02g087010.2	0.028666	1.19	LOW QUALITY:NHL repeat-containing family protein (AHRD V3.3 *** B9HJT0_POPTR)
Solyc03g113770.3	0.0318766	1.19	Pyridoxamine 5-phosphate oxidase, putative (AHRD V3.3 *** B9RJT5_RICCO)
Solyc05g054870.3	0.0336227	1.19	U4/U6 small nuclear Prp3-like ribonucleoprotein (AHRD V3.3 *-* G7IF06_MEDTR)
Solyc02g077610.3	0.0338751	1.19	NAC domain-containing protein (AHRD V3.3 *** A0A060A5P2_BOENI)
Solyc02g085130.3	0.0347893	1.19	Tubby-like F-box protein (AHRD V3.3 *** K4BB27_SOLLC)
Solyc03g006800.1	0.0350131	1.19	TCP transcription factor 21
Solyc03g013630.3	0.037383	1.19	Hexosyltransferase (AHRD V3.3 *** K4BET4_SOLLC)
Solyc03g123710.3	0.0377024	1.19	purple acid phosphatase 17 (AHRD V3.3 --* AT3G17790.1)
Solyc02g086270.3	0.0407455	1.19	Protein kinase family protein (AHRD V3.3 *** AT5G38210.2)
Solyc04g015980.3	0.0455552	1.19	Non-specific serine/threonine protein kinase (AHRD V3.3 *** M1A662_SOLTU)
Solyc01g090250.3	0.0480762	1.19	Integrator complex subunit 4 (AHRD V1 *-*- C0HAD1_SALSA)%3B contains Interpro domain(s) IPR016024 Armadillo-type fold
Solyc04g011780.1	0.0493779	1.19	Glutaredoxin (AHRD V3.3 *** A0A103XEX1_CYNCS)
Solyc12g006370.3	0.00467798	1.18	2-oxoglutarate (2OG) and Fe(II)-dependent oxygenase superfamily protein (AHRD V3.3 *-* AT1G06620.1)
Solyc10g012030.3	0.014826	1.18	Chorismate synthase (AHRD V3.3 *** A0A0B0NMD4_GOSAR)
Solyc10g079770.2	0.0152691	1.18	Triacylglycerol lipase SDP1 (AHRD V3.3 *** W9RS42_9ROSA)
Solyc10g075090.2	0.0189822	1.18	Non-specific lipid-transfer protein (AHRD V3.3 *** Q4A1N0_SOLLC)
Solyc11g040170.2	0.0195906	1.18	mRNA-capping enzyme (AHRD V3.3 *-* W9RTY7_9ROSA)
Solyc05g052480.3	0.0196836	1.18	Multiple inositol polyphosphate phosphatase 1 (AHRD V3.3 *** A0A0B2R9V9_GLYSO)
Solyc02g070000.3	0.0226533	1.18	Leucine-rich receptor-like protein kinase family protein (AHRD V3.3 *** AT4G20940.1)
Solyc08g077150.3	0.0233557	1.18	Protein phosphatase 2C (AHRD V3.3 *** A0A124SBW4_CYNCS)
Solyc10g079950.2	0.0292294	1.18	Glycosyltransferase (AHRD V3.3 *** K4D2N6_SOLLC)
Solyc11g061720.1	0.0299457	1.18	Kinase family protein (AHRD V3.3 *** D7KZX1_ARALL)
Solyc01g104240.3	0.0304775	1.18	Hydroxyproline-rich glycoprotein family protein, putative (AHRD V3.3 *** A0A061DX06_THECC)
Solyc03g112390.3	0.0310212	1.18	R2R3MYB transcription factor 86
Solyc04g074250.2	0.0328804	1.18	Methyl-CpG-binding domain-containing protein 8 (AHRD V3.3 *-* A0A199UGF7_ANACO)
Solyc03g078780.2	0.0348751	1.18	UDP-glycosyltransferase (AHRD V3.3 *** A0A164TMY6_DAUCA)
Solyc03g113750.2	0.0370568	1.18	Pentatricopeptide repeat-containing protein, putative (AHRD V3.3 *** B9R8Z2_RICCO)
Solyc08g081670.2	0.0416581	1.18	Ethylene-responsive transcription factor (AHRD V3.3 *-* W9RJN8_9ROSA)
Solyc12g049350.2	0.0418648	1.18	R2R3MYB transcription factor 11
Solyc08g078550.1	0.0479703	1.18	Metalloendoproteinase 1, putative (AHRD V3.3 *** B9T8P6_RICCO)
Solyc02g068070.3	0.0480651	1.18	Lipase (AHRD V3.3 *** K4B7D9_SOLLC)
Solyc02g085400.3	0.0121182	1.17	Sulfite exporter TauE/SafE family protein (AHRD V3.3 *** AT2G25737.1)
Solyc12g043090.2	0.0161099	1.17	Transcription factor, putative (AHRD V3.3 *-* B9SQC7_RICCO)
Solyc12g089320.2	0.0189623	1.17	Transcription elongation factor family protein, putative isoform 1 (AHRD V3.3 *** A0A061FCJ0_THECC)
Solyc04g054410.3	0.0192358	1.17	Regulation of nuclear pre-mRNA domain-containing 1B (AHRD V3.3 *** A0A0B0P8L0_GOSAR)
Solyc10g009410.1	0.0206162	1.17	Eukaryotic aspartyl protease family protein (AHRD V3.3 *** AT1G01300.1)
Solyc12g044630.2	0.0211453	1.17	Profilin (AHRD V3.3 *** M1CJS2_SOLTU)
Solyc12g005340.2	0.0225293	1.17	GRAS family transcription factor (AHRD V3.3 *** D4QD66_DIACA)
Solyc09g074240.1	0.0232168	1.17	Kinase, putative (AHRD V3.3 *** B9SFK9_RICCO)
Solyc07g054090.3	0.0303541	1.17	Pentatricopeptide repeat-containing protein, putative (AHRD V3.3 *** B9RW07_RICCO)
Solyc02g084880.3	0.0324107	1.17	basic helix-loop-helix (bHLH) DNA-binding superfamily protein (AHRD V3.3 *-* AT1G27660.1)
Solyc04g080790.3	0.0330761	1.17	BEL1-like homeodomain protein (AHRD V3.3 *-* A0A072V2D2_MEDTR)
Solyc10g081870.2	0.0463096	1.17	Digalactosyldiacylglycerol synthase 1 (AHRD V3.3 *-* W8SVK3_TOBAC)
Solyc09g010410.3	0.000795685	1.16	BRI1-KD interacting protein (AHRD V3.3 *** T2DLB0_PHAVU)
Solyc03g025150.3	0.00622637	1.16	Dentin sialophosphoprotein-related, putative isoform 1 (AHRD V3.3 *-* A0A061G268_THECC)
Solyc02g085600.1	0.0154715	1.16	Transcription factor GRAS (AHRD V3.3 *** A0A103YGV0_CYNCS)
Solyc02g070260.3	0.0170425	1.16	Leucine-rich repeat-containing protein (AHRD V3.3 *** A0A103XCI4_CYNCS)
Solyc02g083630.3	0.0209969	1.16	Ascorbate peroxidase (AHRD V3.3 *** Q9XGS8_ZANAE)
Solyc03g026315.1	0.0214383	1.16	ABC transporter family protein (AHRD V3.3 *** A0A072UL65_MEDTR)
Solyc07g054220.1	0.0228486	1.16	Ethylene-responsive transcription factor ERF053 (AHRD V3.3 *** A0A0B2RF70_GLYSO)
Solyc12g096050.2	0.0301558	1.16	Pleckstrin homology (PH) domain-containing protein / lipid-binding START domain-containing protein (AHRD V3.3 *** AT5G45560.1)
Solyc01g088670.2	0.0301983	1.16	Pentatricopeptide repeat-containing protein (AHRD V3.3 *** A0A103XUK0_CYNCS)
Solyc09g008840.3	0.032791	1.16	Pyruvate kinase family protein (AHRD V3.3 *** AT3G52990.1)
Solyc04g025180.3	0.035544	1.16	ABC transporter G family-like protein (AHRD V3.3 *-* A0A072UJT7_MEDTR)
Solyc03g096450.2	0.0408779	1.16	Pentatricopeptide repeat-containing protein (AHRD V3.3 --* D7L220_ARALL)
Solyc07g042000.3	0.041156	1.16	Cation calcium exchanger (AHRD V3.3 *** G7L7L8_MEDTR)
Solyc07g047750.3	0.0464085	1.16	xyloglucan endotransglucosylase/hydrolase 10 (AHRD V3.3 --* AT2G14620.3)
Solyc07g064010.3	0.0480763	1.16	Formin-like protein (AHRD V3.3 *** K4CH84_SOLLC)
Solyc03g114060.3	0.00784537	1.15	BAH domain-containing protein, putative (AHRD V3.3 *** Q53J12_SOLLC)
Solyc03g118425.1	0.015134	1.15	NF-X1-type zinc finger protein NFXL1 (AHRD V3.3 *** W9QPA3_9ROSA)
Solyc01g098390.3	0.0209455	1.15	Gibberellin receptor GID1A (AHRD V3.3 *** V5JFN9_PETHY)
Solyc05g013750.3	0.021021	1.15	Dual specificity phosphatase (AHRD V3.3 *** A0A124SD30_CYNCS)
Solyc01g056570.3	0.0215996	1.15	ankyrin repeat family protein / regulator of chromosome condensation (RCC1) family protein (AHRD V3.3 *** AT3G03790.2)
Solyc01g096230.3	0.0228594	1.15	P-loop containing nucleoside triphosphate hydrolases superfamily protein (AHRD V3.3 *** AT2G46620.1)
Solyc01g099650.3	0.0238897	1.15	Formin-like protein (AHRD V3.3 *** K4B0Z9_SOLLC)
Solyc06g082210.1	0.0264564	1.15	LIGHT-DEPENDENT SHORT HYPOCOTYLS-like protein (DUF640) (AHRD V3.3 *** AT1G07090.1)
Solyc07g053870.3	0.0272461	1.15	Helicase family protein (AHRD V3.3 *** U5FHT2_POPTR)
Solyc02g021590.3	0.028495	1.15	Receptor protein kinase, putative (AHRD V3.3 *** B9T7R3_RICCO)
Solyc04g082590.3	0.0285638	1.15	Protein canopy-1 (AHRD V3.3 *** A0A199UU79_ANACO)
Solyc06g034360.2	0.0290757	1.15	Pectinesterase (AHRD V3.3 *** K4C4Q7_SOLLC)
Solyc11g012620.2	0.0382821	1.15	Agenet domain-containing protein / bromo-adjacent domain-containing protein, putative (AHRD V3.3 *-* A0A061F581_THECC)
Solyc02g092450.3	0.0405284	1.15	Calcium-transporting ATPase (AHRD V3.3 *** M1BXI4_SOLTU)
Solyc05g005580.3	0.0453878	1.15	DUF936 family protein (AHRD V3.3 *** G7K1E3_MEDTR)
Solyc10g084430.2	0.0478472	1.15	RING/U-box superfamily protein (AHRD V3.3 *** AT5G02750.1)
Solyc03g115000.3	6.41178e-08	1.14	Longifolia protein (AHRD V3.3 *** A0A072UUU5_MEDTR)
Solyc08g081620.3	0.000648918	1.14	LEU13054 endo-1,4-beta-glucanase precursor
Solyc06g005650.2	0.00928477	1.14	LOW QUALITY:E3 ubiquitin-protein ligase RING1-like protein (AHRD V3.3 *** A0A072V012_MEDTR)
Solyc06g053910.3	0.0113631	1.14	DUF506 family protein (AHRD V3.3 *** A0A072VMZ8_MEDTR)
Solyc05g010120.3	0.0154177	1.14	Phospholipid-transporting ATPase (AHRD V3.3 *** A0A0V0IZF0_SOLCH)
Solyc06g048950.3	0.018856	1.14	Leucine-rich receptor-like kinase family protein (AHRD V3.3 *** A0A072V1G8_MEDTR)
Solyc05g050090.3	0.0191888	1.14	Fatty acid/sphingolipid desaturase (AHRD V3.3 *** AT2G46210.1)
Solyc10g006890.3	0.0192186	1.14	WD-repeat protein, putative (AHRD V3.3 *** B9T7M5_RICCO)
Solyc11g006180.2	0.0233609	1.14	ethylene receptor homolog (ETR5)
Solyc01g108540.3	0.0270192	1.14	Acetyl esterase IPR013094 Alpha_beta hydrolase fold-3
Solyc09g074690.3	0.0296325	1.14	Homeobox protein LUMINIDEPENDENS, putative (AHRD V3.3 *** B9S3T8_RICCO)
Solyc01g081110.3	0.0299505	1.14	Pentatricopeptide repeat-containing protein (AHRD V3.3 *-* A0A118K4S4_CYNCS)
Solyc08g068460.1	0.0302764	1.14	LOW QUALITY:CK25 (AHRD V3.3 *** Q1W1G0_TOBAC)
Solyc06g066760.3	0.0303332	1.14	Protein-tyrosine phosphatase mitochondrial 1-like protein (AHRD V3.3 *** W9SEA4_9ROSA)
Solyc01g096960.3	0.0304138	1.14	Heat shock family protein (AHRD V3.3 *-* D7LG79_ARALL)
Solyc07g054170.3	0.0365207	1.14	expansin B3 (AHRD V3.3 *** AT4G28250.1)
Solyc06g083920.3	0.0394456	1.14	Sn1-specific diacylglycerol lipase alpha (AHRD V3.3 *-* W9S987_9ROSA)
Solyc01g095100.3	0.0399585	1.14	WRKY transcription factor 22
Solyc07g040680.3	0.0469412	1.14	SolycHsfA9
Solyc06g066600.3	0.0479924	1.14	plastidic glucose translocator 2
Solyc06g076030.3	0.0480125	1.14	Dof zinc finger protein (AHRD V3.3 *** Q9M4G1_SOLTU)
Solyc09g008240.3	0.0028093	1.13	ABC transporter B family protein (AHRD V3.3 *** G7L3V6_MEDTR)
Solyc06g050510.3	0.00466833	1.13	DNA repair rhp54 (AHRD V3.3 *** A0A0B0NS67_GOSAR)
Solyc08g080780.3	0.00515759	1.13	Myosin heavy chain-related protein, putative (AHRD V3.3 *** A0A061GCE0_THECC)
Solyc05g056170.3	0.0128412	1.13	phenylalanine ammonia-lyase 2
Solyc07g007260.3	0.0141314	1.13	Metallocarboxypeptidase inhibitor-like protein (AHRD V3.3 *** A0A089Q749_SOLHA)
Solyc09g072650.3	0.0196866	1.13	Tetratricopeptide repeat 7A (AHRD V3.3 *** A0A0B0PQU8_GOSAR)
Solyc04g005500.3	0.0200243	1.13	T-box transcription factor, putative (DUF863) (AHRD V3.3 *** AT1G69360.1)
Solyc08g081230.1	0.0224618	1.13	BTB/POZ domain-containing protein (AHRD V3.3 *** W9R367_9ROSA)
Solyc08g078270.3	0.0233418	1.13	Protein-tyrosine phosphatase mitochondrial 1-like protein (AHRD V3.3 *** W9SEA4_9ROSA)
Solyc02g081250.2	0.0275118	1.13	Pentatricopeptide repeat-containing protein (AHRD V3.3 *-* A0A103Y0J8_CYNCS)
Solyc08g065450.2	0.0289736	1.13	Far upstream element-binding protein (AHRD V3.3 --* A0A0K9PWL1_ZOSMR)
Solyc03g123860.3	0.0293005	1.13	Receptor-like protein kinase INRPK1c
Solyc02g079930.3	0.029939	1.13	phosphosulfolactate synthase
Solyc04g082940.3	0.0300222	1.13	Cysteine/histidine-rich C1 domain protein (AHRD V3.3 *** G7IA18_MEDTR)
Solyc02g091030.3	0.0302719	1.13	Nuclear transcription factor Y subunit C-2 (AHRD V3.3 *-* W9SQ52_9ROSA)
Solyc10g005090.3	0.0307305	1.13	Pentatricopeptide repeat-containing protein (AHRD V3.3 *** D7M1C9_ARALL)
Solyc02g077270.3	0.0327396	1.13	Calcium-binding EF-hand (AHRD V3.3 *-* A0A103XMB0_CYNCS)
Solyc06g066520.1	0.0356862	1.13	LOW QUALITY:Avr9/Cf-9 rapidly elicited protein 146 (AHRD V3.3 *** Q9FQZ6_TOBAC)
Solyc07g063350.3	0.038064	1.13	COP1-interacting protein, putative (AHRD V3.3 *** A0A072VAF6_MEDTR)
Solyc01g005530.3	0.0391884	1.13	nuclear polyadenylated RNA-binding protein (AHRD V3.3 *** AT3G13480.2)
Solyc03g025760.3	0.0420343	1.13	Protein O-glucosyltransferase 1 (AHRD V3.3 *** A0A199V2E0_ANACO)
Solyc08g016440.3	0.0421181	1.13	Polynucleotidyl transferase, ribonuclease H-like superfamily protein (AHRD V3.3 --* AT2G13980.1)
Solyc05g014700.3	0.0473413	1.13	Acid phosphatase/vanadium-dependent haloperoxidase-related protein (AHRD V3.3 *** AT1G67600.1)
Solyc11g011240.1	0.0479364	1.13	geranylgeranyl pyrophosphate synthase 1
Solyc03g112580.3	0.00533493	1.12	Receptor protein kinase, putative (AHRD V3.3 *** B9RAX9_RICCO)
Solyc06g068920.3	0.0117578	1.12	Kinase, putative (AHRD V3.3 *** B9T5A7_RICCO)
Solyc05g056120.3	0.0156794	1.12	GATA transcription factor (AHRD V3.3 *** K4C2T6_SOLLC)
Solyc06g059750.3	0.0166304	1.12	Transcriptional corepressor SEUSS, putative (AHRD V3.3 *** B9S2M5_RICCO)
Solyc05g053770.3	0.0189552	1.12	Electron transport complex protein rnfC, putative isoform 1 (AHRD V3.3 *-* A0A061EJK1_THECC)
Solyc01g107800.3	0.0190216	1.12	glucuronoxylan 4-O-methyltransferase-like protein (DUF579) (AHRD V3.3 *** AT1G71690.1)
Solyc02g067990.3	0.0198221	1.12	HAUS augmin-like complex subunit 6 (AHRD V3.3 *** A0A061ECN9_THECC)
Solyc10g086280.2	0.020997	1.12	Heavy metal transport/detoxification superfamily protein (AHRD V3.3 *** AT5G03380.1)
Solyc03g115680.3	0.0209972	1.12	Protein kinase superfamily protein (AHRD V3.3 *-* AT1G18670.3)
Solyc11g044470.2	0.0212157	1.12	RNA binding protein, putative (AHRD V3.3 *** B9RW95_RICCO)
Solyc02g093430.3	0.0214018	1.12	Beta-1,4-N-acetylglucosaminyltransferase-like protein (AHRD V3.3 *** A0A072U8D1_MEDTR)
Solyc06g008600.3	0.0230088	1.12	E3 ubiquitin protein ligase DRIP2 (AHRD V3.3 *** W9RBR4_9ROSA)
Solyc01g010520.3	0.0233656	1.12	helicase with zinc finger protein (AHRD V3.3 *** AT2G46420.3)
Solyc07g007660.1	0.0285804	1.12	LOW QUALITY:Mitochondrial group I intron splicing factor CCM1 (AHRD V3.3 *** A0A1D1ZJQ2_9ARAE)
Solyc01g098710.3	0.0285881	1.12	Eukaryotic aspartyl protease family protein (AHRD V3.3 *** AT5G43100.1)
Solyc09g065620.3	0.0304739	1.12	Chlorophyllase (AHRD V3.3 *** W6EIP8_WHEAT)
Solyc08g067970.3	0.0349467	1.12	Pre-mRNA cleavage complex 2 protein Pcf11, putative isoform 2 (AHRD V3.3 *** A0A061GBF7_THECC)
Solyc06g072740.1	0.0439876	1.12	Inositol-tetrakisphosphate 1-kinase (AHRD V3.3 *** K4C8Z4_SOLLC)
Solyc04g079600.3	0.0483677	1.12	Homeodomain-like superfamily protein (AHRD V3.3 *** AT5G42630.1)
Solyc03g122040.3	0.00564937	1.11	Erect panicle 2 protein (AHRD V3.3 *-* I2AW42_9POAL)
Solyc02g090380.3	0.0189536	1.11	NBS-LRR disease resistance protein (AHRD V3.3 *** G7K839_MEDTR)
Solyc05g056450.3	0.0210072	1.11	Eukaryotic aspartyl protease family protein (AHRD V3.3 *** AT2G03200.1)
Solyc01g090560.3	0.0240741	1.11	Ethylene-responsive transcription factor (AHRD V3.3 *-* W9R3T6_9ROSA)
Solyc05g054030.3	0.0242815	1.11	Zinc finger family protein (AHRD V3.3 *** B9HJL4_POPTR)
Solyc08g007340.3	0.0276003	1.11	Protein transport protein Sec16B (AHRD V3.3 *** W9SEE7_9ROSA)
Solyc04g080490.3	0.0285917	1.11	ZF-HD homeobox protein (AHRD V3.3 *** A0A0B2PTM6_GLYSO)
Solyc06g054310.1	0.0290294	1.11	LOW QUALITY:Fantastic four-like protein (AHRD V3.3 *** G7IE53_MEDTR)
Solyc05g050750.1	0.0297788	1.11	Calcium-binding protein (AHRD V3.3 *** Q9SCA1_LOTJA)
Solyc02g066830.3	0.0300408	1.11	Nuclear transport factor 2 family protein with RNA binding domain isoform 2 (AHRD V3.3 *** A0A061EH36_THECC)
Solyc03g082390.3	0.0301319	1.11	NAD(P)H-quinone oxidoreductase chain 4, chloroplastic (AHRD V3.3 --* NU4C_CHLAT)
Solyc03g122360.3	0.0302574	1.11	Cytochrome P450 (AHRD V3.3 *** A0A103XLI8_CYNCS)
Solyc01g111970.3	0.030394	1.11	L-ascorbate oxidase-like protein (AHRD V3.3 *** W9RW65_9ROSA)
Solyc03g121280.3	0.0340188	1.11	Core-2/I-branching beta-1,6-N-acetylglucosaminyltransferase family protein (AHRD V3.3 *** AT3G21310.3)
Solyc12g013820.2	0.0346306	1.11	Ubiquitin conjugating enzyme, putative (AHRD V3.3 *** B9T0E4_RICCO)
Solyc04g079300.3	0.041304	1.11	Calcineurin-like metallo-phosphoesterase superfamily protein (AHRD V3.3 *** AT4G11800.1)
Solyc06g072730.3	0.0446468	1.11	WEB family protein, chloroplastic (AHRD V3.3 *** A0A0B2RLR4_GLYSO)
Solyc05g010420.2	0.000605497	1.1	S-adenosylmethionine decarboxylase proenzyme (AHRD V3.3 *** DCAM_SOLCI)
Solyc02g080220.3	0.00696116	1.1	Pectinesterase (AHRD V3.3 *** K4B9P3_SOLLC)
Solyc01g005340.3	0.021013	1.1	Ankyrin repeat family protein (AHRD V3.3 *** B9HW17_POPTR)
Solyc01g095730.3	0.0213179	1.1	Poly(A) RNA polymerase cid14 (AHRD V3.3 *** W9RAG3_9ROSA)
Solyc06g061020.3	0.0304214	1.1	SBP (S-ribonuclease-binding protein) family protein (AHRD V3.3 *** G7JYN7_MEDTR)
Solyc11g013270.2	0.034965	1.1	O-fucosyltransferase family protein (AHRD V3.3 *** AT1G38131.1)
Solyc04g014960.3	0.0359313	1.1	Alpha 1,4-glycosyltransferase family protein (AHRD V3.3 *-* Q2MGS1_MEDTR)
Solyc01g103170.3	0.0401743	1.1	lysine ketoglutarate reductase trans-splicing-like protein, putative (DUF707) (AHRD V3.3 *** AT4G18530.3)
Solyc07g026620.3	0.040635	1.1	TUBULIN-FOLDING COFACTOR E family protein (AHRD V3.3 --* B9IQ98_POPTR)
Solyc02g090220.3	0.0406964	1.1	Zinc finger, Dof-type (AHRD V3.3 *** A0A124SC40_CYNCS)
Solyc02g087425.1	0.0419272	1.1	Type I inositol-1,4,5-trisphosphate 5-phosphatase CVP2 (AHRD V3.3 *-* W9QPW1_9ROSA)
Solyc09g055900.3	0.0476653	1.1	Lipoxygenase (AHRD V3.3 *** K4CT85_SOLLC)
Solyc03g112420.2	0.0479566	1.1	Pentatricopeptide repeat-containing protein (AHRD V3.3 *** A0A103XY30_CYNCS)
Solyc12g035130.2	2.9976e-15	1.09	RNA helicase DEAD36
Solyc04g054740.3	5.75089e-07	1.09	myo-inositol-1-phosphate synthase
Solyc10g078550.3	0.00273326	1.09	glutamate dehydrogenase
Solyc08g078530.3	0.00277084	1.09	Agenet-like domain-containing protein (AHRD V3.3 *** A0A103XFP8_CYNCS)
Solyc01g094620.3	0.0152705	1.09	Mediator of RNA polymerase II transcription subunit 12 (AHRD V3.3 *** MED12_ARATH)
Solyc05g051400.3	0.0195338	1.09	Mitochondrial carrier protein (AHRD V3.3 *** A0A0K9PSM6_ZOSMR)
Solyc01g111890.3	0.0202555	1.09	F-box family protein (AHRD V3.3 *** B9HR17_POPTR)
Solyc07g040980.3	0.0209406	1.09	Serine/arginine repetitive matrix protein 2 isoform 2 (AHRD V3.3 *** A0A061GLE4_THECC)
Solyc05g053890.2	0.0223976	1.09	Glycosyltransferase (AHRD V3.3 *** K4C268_SOLLC)
Solyc03g026290.3	0.0227315	1.09	Post-GPI attachment-like factor-protein (AHRD V3.3 *** A0A072UAB4_MEDTR)
Solyc05g005150.1	0.0264509	1.09	Kelch repeat-containing F-box family protein, putative (AHRD V3.3 *** A0A061E7C3_THECC)
Solyc06g009130.3	0.0287715	1.09	Magnesium/proton exchanger family member (AHRD V3.3 *** K4C3U3_SOLLC)
Solyc04g078650.3	0.0290748	1.09	wuschel related homobox 4
Solyc08g081290.3	0.0298422	1.09	ARID/BRIGHT DNA-binding domain-containing protein (AHRD V3.3 *** A0A118JWJ3_CYNCS)
Solyc06g008820.3	0.0329821	1.09	Na+/H+ antiporter 1
Solyc07g054270.3	0.0346879	1.09	Plant/F9H3-4 protein (AHRD V3.3 *** A0A072VLR0_MEDTR)
Solyc06g051990.3	0.0348988	1.09	Defective in meristem silencing 3 (AHRD V3.3 *** A0A061G2F1_THECC)
Solyc08g075940.3	0.0349217	1.09	DNA-directed RNA polymerase subunit beta (AHRD V3.3 *** K4CMW1_SOLLC)
Solyc01g073720.2	0.0422267	1.09	LOW QUALITY:RING/U-box superfamily protein (AHRD V3.3 --* AT3G26730.8)
Solyc07g047820.2	0.0422545	1.09	Pentatricopeptide repeat-containing protein (AHRD V3.3 *** A0A124SF42_CYNCS)
Solyc01g090870.1	0.0449598	1.09	Transcription repressor OFP17 (AHRD V3.3 *** OPF17_ARATH)
Solyc07g066200.3	0.00328625	1.08	Elongation factor G (AHRD V3.3 *** A0A0B0MLE6_GOSAR)
Solyc01g094800.3	0.0049331	1.08	ATP-dependent helicase BRM (AHRD V3.3 *** W9QEL4_9ROSA)
Solyc01g087490.3	0.0050625	1.08	Peptidyl-prolyl cis-trans isomerase FKBP42 (AHRD V3.3 *-* A0A0B2RKD3_GLYSO)
Solyc06g060230.3	0.00640427	1.08	NAC domain-containing protein, putative (AHRD V3.3 *** B9S2X2_RICCO)
Solyc06g082010.3	0.00752961	1.08	Zinc finger transcription factor 48
Solyc10g075070.2	0.012325	1.08	Non-specific lipid-transfer protein (AHRD V3.3 *** K4D1U9_SOLLC)
Solyc03g058970.3	0.0189997	1.08	Alkaline alpha-galactosidase seed imbibition protein (AHRD V3.3 *** Q8H6N3_SOLLC)
Solyc07g005970.3	0.0192399	1.08	Autophagy-related protein 11 (AHRD V3.3 *** W9S712_9ROSA)
Solyc10g083500.2	0.0204167	1.08	Protein kinase family protein (AHRD V3.3 *-* Q9LZS4_ARATH)
Solyc11g069960.2	0.0209977	1.08	RLK-1
Solyc12g088310.2	0.0210169	1.08	FAD/NAD(P)-binding oxidoreductase (AHRD V3.3 --* AT1G15140.3)
Solyc03g113450.3	0.0252079	1.08	Receptor-like protein kinase (AHRD V3.3 *** Q9FM23_ARATH)
Solyc09g091260.3	0.0285624	1.08	Non-specific serine/threonine protein kinase (AHRD V3.3 *** K4CWF2_SOLLC)
Solyc08g066810.3	0.0285656	1.08	Glycosyl hydrolase family 5 protein (AHRD V3.3 *** D7KPG3_ARALL)
Solyc04g005425.1	0.0294556	1.08	Pentatricopeptide repeat (PPR) superfamily protein (AHRD V3.3 *** A0A061EBH5_THECC)
Solyc03g044090.3	0.0303613	1.08	Phototropic-responsive NPH3 family protein
Solyc01g086950.3	0.0303833	1.08	SWIB/MDM2 and Plus-3 and GYF domain-containing protein (AHRD V3.3 *** AT5G08430.2)
Solyc06g048893.1	0.0304141	1.08	Protein kinase (AHRD V3.3 *** A0A0K9NZM3_ZOSMR)
Solyc10g086320.2	0.0313217	1.08	Phosphatidylinositol-4-phosphate 5-kinase family protein (AHRD V3.3 *** A0A072VJC1_MEDTR)
Solyc03g005970.3	0.0344231	1.08	RING/U-box superfamily protein (AHRD V3.3 *** AT3G53690.1)
Solyc04g079170.3	0.0347867	1.08	BRCT domain-containing DNA repair protein (AHRD V3.3 --* AT4G03130.2)
Solyc04g078590.3	0.0375248	1.08	Receptor protein kinase, putative (AHRD V3.3 *** B9T4U3_RICCO)
Solyc04g015580.3	0.0480733	1.08	Protein EFR3 B (AHRD V3.3 *** A0A1D1ZEH0_9ARAE)
Solyc11g008900.2	0.00437472	1.07	Zinc finger transcription factor 65
Solyc04g071990.3	0.00667677	1.07	GIGANTEA (AHRD V3.3 *** F2Z6M2_IPONI)
Solyc02g089610.2	0.00683954	1.07	S-adenosylmethionine decarboxylase 2
Solyc04g071040.3	0.0127762	1.07	Regulator of chromosome condensation (RCC1) family with FYVE zinc finger domain-containing protein (AHRD V3.3 *** AT5G42140.2)
Solyc01g010135.1	0.0195712	1.07	basic helix-loop-helix (bHLH) DNA-binding superfamily protein (AHRD V3.3 *** AT1G68920.3)
Solyc10g006130.1	0.0195868	1.07	EAR motif SlERF36
Solyc09g074640.3	0.0209854	1.07	Zinc finger transcription factor 54
Solyc01g081297.1	0.0209959	1.07	phosphoenolpyruvate carboxylase-related kinase 2 (AHRD V3.3 *** AT1G12680.1)
Solyc07g063330.3	0.0220628	1.07	WD-repeat protein, putative (AHRD V3.3 *** B9T7M5_RICCO)
Solyc08g079470.3	0.0221431	1.07	Glycine cleavage T-protein aminomethyltransferase (AHRD V3.3 *** A0A072V145_MEDTR)
Solyc05g013300.1	0.0258584	1.07	Pseudomonas syringae pv tomato resis.
Solyc07g064290.3	0.0286602	1.07	Ras-related small GTP-binding family protein (AHRD V3.3 *** G7K3G2_MEDTR)
Solyc02g078210.3	0.0293527	1.07	Ubiquitin-conjugating enzyme family protein (AHRD V3.3 *** U5FV88_POPTR)
Solyc12g014200.2	0.0301515	1.07	trichome birefringence-like protein (DUF828) (AHRD V3.3 *** AT1G73140.1)
Solyc01g014480.3	0.0305489	1.07	ETHYLENE INSENSITIVE 3-like 3 protein (AHRD V3.3 *** W9RBN4_9ROSA)
Solyc08g065860.3	0.0380009	1.07	Core-2/I-branching beta-1,6-N-acetylglucosaminyltransferase family protein (AHRD V3.3 *** AT5G11730.1)
Solyc04g005910.3	0.0416107	1.07	NSP-interacting kinase 2 (AHRD V3.3 *** AT3G25560.1)
Solyc11g017360.2	0.0455054	1.07	Myb family transcription factor (AHRD V3.3 *-* D7M1F0_ARALL)
Solyc03g097980.3	0.0478972	1.07	Guanine nucleotide-binding alpha-2 subunit (AHRD V3.3 *** A0A0B0N4X6_GOSAR)
Solyc04g051247.1	0.0479103	1.07	Cytochrome P450 (AHRD V3.3 *** Q0PNH1_CAPCH)
Solyc07g008280.3	0.0480526	1.07	Transmembrane protein, putative (AHRD V3.3 *** G7JD04_MEDTR)
Solyc03g007770.3	0.0133454	1.06	S-type anion channel (AHRD V3.3 *** A0A098GMQ9_9ROSI)
Solyc04g072630.3	0.0139285	1.06	F-box and Leucine Rich Repeat domains containing protein, putative isoform 1 (AHRD V3.3 *** A0A061FNK3_THECC)
Solyc08g063090.2	0.0141006	1.06	Sphingolipid delta-8 desaturase (AHRD V3.3 *** A4GK73_TOBAC)
Solyc10g008420.3	0.0160767	1.06	acyl-UDP-N-acetylglucosamine O-acyltransferase (AHRD V3.3 *** AT4G28260.2)
Solyc06g084420.1	0.0160926	1.06	Leucine-rich repeat receptor-like kinase (AHRD V3.3 *** A0A0K9PKL2_ZOSMR)
Solyc07g061780.3	0.020752	1.06	Ubiquitin carboxyl-terminal hydrolase 15-like protein (AHRD V3.3 *** A0A0B0MG64_GOSAR)
Solyc04g076540.3	0.0210217	1.06	Golgi-body localization protein domain isoform 4 (AHRD V3.3 *** A0A061FEK5_THECC)
Solyc06g008740.3	0.0228826	1.06	Zinc finger transcription factor 40
Solyc03g098460.3	0.0287273	1.06	NAD(P)-binding Rossmann-fold superfamily protein (AHRD V3.3 *** AT4G27760.1)
Solyc04g080420.3	0.0298731	1.06	Mannose-binding lectin (AHRD V3.3 *-* A0A103XWY0_CYNCS)
Solyc02g088510.3	0.030316	1.06	Saccharopine dehydrogenase (AHRD V3.3 *** AT5G39410.1)
Solyc11g006640.2	0.0342829	1.06	Disease resistance protein (AHRD V3.3 *** A0A103Y7R3_CYNCS)
Solyc12g099340.2	0.0353542	1.06	calmodulin-binding transcription activator (AHRD V3.3 *** AT3G16940.3)
Solyc12g056550.1	0.0379139	1.06	LOW QUALITY:Plant/F1M20-13 protein (AHRD V3.3 *** G7IBZ7_MEDTR)
Solyc01g065540.3	0.038807	1.06	Two-component response regulator (AHRD V3.3 *** W9RS74_9ROSA)
Solyc01g044307.1	0.039346	1.06	RING/U-box superfamily protein (AHRD V3.3 *** AT1G05890.1)
Solyc04g025440.3	0.040617	1.06	Pectin lyase-like superfamily protein (AHRD V3.3 *** AT1G23460.1)
Solyc10g012430.3	0.0407025	1.06	Signal peptide peptidase-like protein (AHRD V3.3 *** G7LBR2_MEDTR)
Solyc06g008360.3	0.0408595	1.06	NAC domain protein, (AHRD V3.3 *** A0A061DNM9_THECC)
Solyc01g094630.3	0.0415025	1.06	pre-mRNA-splicing factor CWC22-like protein (DUF3245) (AHRD V3.3 *** AT3G61370.3)
Solyc02g070920.3	0.0415203	1.06	Serine/threonine-protein kinase SAPK7 (AHRD V3.3 --* SAPK7_ORYSJ)
Solyc07g063830.3	0.0417009	1.06	bHLH transcription factor142
Solyc11g040067.1	0.0479236	1.06	F-box/associated interaction domain protein (AHRD V3.3 --* AT1G53360.2)
Solyc01g100020.3	0.0480675	1.06	Phospholipase D (AHRD V3.3 *** I1NJ37_SOYBN)
Solyc07g065370.3	0.00644637	1.05	Agenet domain-containing protein / bromo-adjacent domain-containing protein, putative (AHRD V3.3 *** A0A061F581_THECC)
Solyc10g054440.2	0.00895246	1.05	arginine decarboxylase 1
Solyc01g103990.3	0.0157654	1.05	T-complex protein 11 (AHRD V3.3 *** U5GGZ4_POPTR)
Solyc11g066500.2	0.0183302	1.05	Ring/U-Box superfamily protein (AHRD V3.3 *-* AT2G27950.3)
Solyc08g077430.3	0.0190084	1.05	Glycine-rich protein (AHRD V3.3 *** D7MQL9_ARALL)
Solyc09g063090.3	0.0199105	1.05	methyl-coenzyme M reductase II subunit gamma, putative (DUF3741) (AHRD V3.3 *** AT4G28760.2)
Solyc08g029130.3	0.0199679	1.05	chromatin remodeling factor CHD3 (PICKLE) (AHRD V3.3 *** AT2G25170.4)
Solyc12g098640.2	0.0207434	1.05	Cycloeucalenol cycloisomerase (AHRD V3.3 *-* CCI1_ARATH)
Solyc05g023770.3	0.0210193	1.05	coiled-coil protein (AHRD V3.3 *** AT3G48860.2)
Solyc07g042550.3	0.0231454	1.05	Sucrose synthase (AHRD V3.3 *** SUS2_SOLTU)
Solyc08g077500.3	0.0277128	1.05	Pleckstrin (PH) domain-containing protein isoform 1 (AHRD V3.3 *** A0A061G2P4_THECC)
Solyc03g005170.3	0.0278871	1.05	Acyl-CoA N-acyltransferase with RING/FYVE/PHD-type zinc finger protein, putative (AHRD V3.3 *** A0A061EMV6_THECC)
Solyc12g049550.2	0.029721	1.05	GDSL esterase/lipase 5 (AHRD V3.3 *** GLIP5_ARATH)
Solyc06g008610.3	0.0301044	1.05	WRKY transcription factor 21
Solyc04g077460.3	0.0323865	1.05	Amino acid transporter (AHRD V3.3 *** A0A061FF30_THECC)
Solyc09g074730.2	0.0328765	1.05	Homeobox protein LUMINIDEPENDENS (AHRD V3.3 *** A0A0B2S9W0_GLYSO)
Solyc10g008480.3	0.0349458	1.05	Plant/F9H3-4 protein (AHRD V3.3 *** A0A072VLR0_MEDTR)
Solyc11g066000.1	0.0384883	1.05	Cyclin-dependent protein kinase inhibitor SMR14 (AHRD V3.3 --* SMR14_ARATH)
Solyc02g071590.2	0.0412561	1.05	Trehalose-6-phosphate synthase, putative (AHRD V3.3 *-* B9S8H7_RICCO)
Solyc11g008080.2	0.0414208	1.05	DUF1635 family protein (AHRD V3.3 *** A0A072VZ15_MEDTR)
Solyc05g016390.3	0.0415452	1.05	Carbohydrate-binding X8 domain superfamily protein (AHRD V3.3 *-* AT1G79480.2)
Solyc11g007400.1	0.0478035	1.05	LOW QUALITY:Receptor-like protein kinase (AHRD V3.3 *-* Q9M576_ORYSA)
Solyc07g006480.3	0.0479421	1.05	Receptor-like kinase (AHRD V3.3 *** D4QD70_DIACA)
Solyc01g086957.1	0.0480496	1.05	GYF domain protein (AHRD V3.3 *-* A0A072UAG4_MEDTR)
Solyc03g113970.3	0.0480687	1.05	Calmodulin-binding protein (AHRD V3.3 *-* AT5G57580.1)
Solyc04g076550.3	0.04807	1.05	Golgi-body localization protein domain isoform 4 (AHRD V3.3 *-* A0A061FEK5_THECC)
Solyc03g026220.3	0.00526418	1.04	BAG family molecular chaperone regulator-like protein (AHRD V3.3 *** A0A072TGZ0_MEDTR)
Solyc01g102610.3	0.00689433	1.04	Ferric reduction oxidase 7 (AHRD V3.3 *** W9RRH7_9ROSA)
Solyc02g080880.3	0.0118394	1.04	Aspartic proteinase (AHRD V3.3 *** ASPR_CUCPE)
Solyc02g086750.2	0.0136809	1.04	Serine/threonine-protein kinase ATM (AHRD V3.3 *** A0A151R6X6_CAJCA)
Solyc07g055640.1	0.0197519	1.04	Serine/threonine-protein kinase (AHRD V3.3 *-* A0A0D4BTD1_SOLPN)
Solyc11g005030.2	0.0210234	1.04	Protein translocase subunit SecA (AHRD V3.3 *** V4KTM1_EUTSA)
Solyc05g006640.3	0.0252704	1.04	Phospholipid-transporting ATPase (AHRD V3.3 *** A0A0V0IYV6_SOLCH)
Solyc11g011060.2	0.0285447	1.04	disease resistance protein (TIR-NBS-LRR class) (AHRD V3.3 *-* AT5G17680.1)
Solyc12g019975.1	0.028556	1.04	Glycosyltransferase (AHRD V3.3 *-* K4D3V7_SOLLC)
Solyc07g042830.3	0.0285613	1.04	Starch synthase, chloroplastic/amyloplastic (AHRD V3.3 *** B2ZGM9_SOLLC)
Solyc05g014390.3	0.0285621	1.04	ABC subfamily C transporter (AHRD V3.3 *** A0A077RXF4_WHEAT)
Solyc09g064420.3	0.0296488	1.04	28 kDa ribonucleoprotein, chloroplastic (AHRD V3.3 *-* M7YFE5_TRIUA)
Solyc01g098340.3	0.0298749	1.04	DnaJ domain-containing protein (AHRD V3.3 *** A0A103XK41_CYNCS)
Solyc06g009370.3	0.0303114	1.04	tolB protein-like protein (AHRD V3.3 *** AT4G01870.2)
Solyc01g109860.3	0.0412466	1.04	Sec14p-like phosphatidylinositol transfer family protein (AHRD V3.3 *** AT2G18180.2)
Solyc02g005110.3	0.0432043	1.04	Homeobox leucine-zipper protein (AHRD V3.3 --* Q8H963_ZINVI)
Solyc10g047410.1	0.0478632	1.04	Photosystem II CP43 reaction center protein (AHRD V3.3 *-* PSBC_SOLLC)
Solyc06g051320.3	0.0479891	1.04	HXXXD-type acyl-transferase family protein, putative (AHRD V3.3 *** A0A061EWX8_THECC)
Solyc03g006670.3	0.0495499	1.04	cyclinD6_2
Solyc05g053240.3	0.0082789	1.03	Squamosa promoter binding protein12b
Solyc04g074980.3	0.0136869	1.03	TRANSPORT INHIBITOR RESPONSE 1 protein, putative (AHRD V3.3 *** B9RJT7_RICCO)
Solyc03g121660.3	0.0202676	1.03	Zinc finger family protein (AHRD V3.3 *** D7MN23_ARALL)
Solyc07g008670.3	0.0209964	1.03	Protein LONGIFOLIA 1 (AHRD V3.3 *** A0A199VV70_ANACO)
Solyc01g104300.3	0.0212172	1.03	DUF639 family protein (AHRD V3.3 *** G7IJX0_MEDTR)
Solyc04g008850.1	0.0221657	1.03	Eukaryotic aspartyl protease family protein (AHRD V3.3 *** AT3G20015.1)
Solyc08g076650.3	0.022282	1.03	Trehalose-6-phosphate synthase, putative (AHRD V3.3 *** Q2A970_BRAOL)
Solyc12g007070.2	0.0223284	1.03	SolycHsfC1
Solyc07g007590.1	0.0229367	1.03	Arogenate dehydrogenase 1 (AHRD V3.3 *** F1BPV5_SOLPN)
Solyc02g077420.3	0.0300343	1.03	Phospholipase A1 (AHRD V3.3 *** A5YW95_CAPAN)
Solyc00g009110.3	0.0301195	1.03	inositol-1,4,5-triphosphate-5-phosphatase 2
Solyc01g107460.2	0.0301788	1.03	LOW QUALITY:neuronal PAS domain protein (AHRD V3.3 *** AT5G64190.2)
Solyc12g014170.2	0.0302418	1.03	Transcription factor GTE4 (AHRD V3.3 *** W9QS80_9ROSA)
Solyc00g005094.1	0.0303574	1.03	Glucose-6-phosphate 1-dehydrogenase 3, chloroplastic (AHRD V3.3 --* G6PD3_ARATH)
Solyc03g098290.3	0.034474	1.03	Sucrose synthase (AHRD V3.3 *** M5WCU1_PRUPE)
Solyc05g013180.3	0.0348643	1.03	Phosphate transporter PHO1-like protein (AHRD V3.3 *** A0A193CD86_9ERIC)
Solyc06g072845.1	0.0350849	1.03	Hydrogen peroxide-induced 1 (AHRD V3.3 *** B8Y3H9_TOBAC)
Solyc01g103360.3	0.0357845	1.03	glucuronoxylan 4-O-methyltransferase-like protein (DUF579) (AHRD V3.3 *** AT1G09610.1)
Solyc09g018020.3	0.0436917	1.03	Expansin (AHRD V3.3 *** G4XZW3_9GENT)
Solyc08g062500.3	0.0190351	1.02	EEIG1/EHBP1 protein amino-terminal domain protein (AHRD V3.3 *** AT5G20610.1)
Solyc08g065430.3	0.0192578	1.02	Pollen specific protein sf21, putative (AHRD V3.3 *** B9RRU1_RICCO)
Solyc03g115100.3	0.0208472	1.02	Formate hydrogenlyase subunit 5 (AHRD V3.3 *** A0A0B0NQY9_GOSAR)
Solyc01g102500.3	0.0209933	1.02	Plant/F18B3-190 protein, putative (AHRD V3.3 *** A0A072TSF8_MEDTR)
Solyc05g014030.3	0.0218218	1.02	Regulator of chromosome condensation (RCC1) family protein (AHRD V3.3 *** AT3G26100.6)
Solyc08g013730.3	0.0225807	1.02	NOD26-like intrinsic protein5.1
Solyc10g006860.3	0.0246031	1.02	NAD(P)-binding Rossmann-fold superfamily protein (AHRD V3.3 *** AT2G17845.1)
Solyc02g088340.3	0.0287395	1.02	WRKY transcription factor 3
Solyc02g067230.3	0.0300127	1.02	Dof zinc finger protein3
Solyc01g090160.3	0.031201	1.02	Glycogen synthase kinase-3 homolog MsK-3 (AHRD V3.3 --* MSK3_MEDSA)
Solyc10g078680.2	0.033146	1.02	C2 calcium/lipid-binding and GRAM domain protein (AHRD V3.3 *** A0A072TGP1_MEDTR)
Solyc08g061910.3	0.0349487	1.02	Trihelix transcription factor GT-2-like protein (AHRD V3.3 --* A0A0B0NUX7_GOSAR)
Solyc01g057310.3	0.0412651	1.02	Kinesin-like protein KIF15 (AHRD V3.3 *** A0A0B2P1R3_GLYSO)
Solyc04g015630.2	0.043111	1.02	NBS-LRR disease resistance protein (AHRD V3.3 *** C6FF78_SOYBN)
Solyc01g110010.3	0.0468724	1.02	Pentatricopeptide repeat-containing protein (AHRD V3.3 *** A0A103XXP7_CYNCS)
Solyc11g006980.1	0.0483554	1.02	Germin family 1 protein (AHRD V3.3 *** A0A072VRM6_MEDTR)
