# Supplementary material for: Trichoderma atroviride P1 Colonization of Tomato Plants Enhances Both Direct and Indirect Defense Barriers Against Insects
Source: Front Physiol. 2019 Jul 5;10:813. doi: 10.3389/fphys.2019.00813 (PMC6624734; doi:10.3389/fphys.2019.00813)
Supplement: Supplementary file 2 [file Table_2.xlsx]

## Sheet: Foglio2
Supplementary table 2. Table lists down-regulated genes in Dwarf San Marzano plants treated with Trichoderma P1.
Locus	FDR	log2FC	Description
Solyc06g074820.3	0	-1.02	tonoplast intrinsic protein 1.1
Solyc09g098300.3	1.43647e-05	-1.02	proline-rich family protein (AHRD V3.3 *-* AT2G41420.1)
Solyc06g065390.3	0.0016453	-1.02	50S ribosomal protein L21, chloroplastic (AHRD V3.3 *** A0A199W1N6_ANACO)
Solyc06g082870.3	0.00298869	-1.02	60S ribosomal protein L5-like protein (AHRD V3.3 *** T2DN67_PHAVU)
Solyc12g049220.2	0.00333126	-1.02	Mitochondrial import inner membrane translocase subunit tim23 (AHRD V3.3 *** A0A0K9Q5U7_ZOSMR)
Solyc08g061960.3	0.00446317	-1.02	Ribosomal protein S3 family protein (AHRD V3.3 *** AT5G35530.1)
Solyc06g071720.1	0.0050711	-1.02	60S ribosomal protein L27A (AHRD V3.3 *** B6VC54_VERFO)
Solyc03g043740.3	0.00835917	-1.02	hydroxyproline-rich glycoprotein family protein (AHRD V3.3 *** AT5G65660.1)
Solyc01g010580.3	0.00878202	-1.02	40S ribosomal protein S9, putative (AHRD V3.3 *** Q60CZ2_SOLDE)
Solyc06g083360.3	0.00891056	-1.02	DNA-directed RNA polymerase II, subunit n, putative (AHRD V3.3 *** B9T3C0_RICCO)
Solyc07g042570.3	0.0134468	-1.02	Eukaryotic translation initiation factor 3 subunit K (AHRD V3.3 *** K4CEB8_SOLLC)
Solyc02g082500.1	0.0170893	-1.02	Ribosomal protein L11 (AHRD V3.3 *** A9P9X1_POPTR)
Solyc02g081810.3	0.0204097	-1.02	H/ACA ribonucleoprotein complex subunit 4 (AHRD V3.3 *** CBF5_ARATH)
Solyc05g050550.3	0.0219157	-1.02	DUF688 family protein (AHRD V3.3 *** A0A072U4Q9_MEDTR)
Solyc08g081195.1	0.0233983	-1.02	heavy metal atpase 3 (AHRD V3.3 --* AT4G30120.2)
Solyc01g086930.3	0.0315554	-1.02	GAMMA RESPONSE 1 family protein (AHRD V3.3 *** B9GFQ6_POPTR)
Solyc02g070820.1	0.0358793	-1.02	LOW QUALITY:Avr9/Cf-9 rapidly elicited protein 180 (AHRD V3.3 *** Q9FQZ1_TOBAC)
Solyc05g054110.3	0.0391885	-1.02	Rho GDP-dissociation inhibitor 1 family protein (AHRD V3.3 *** B9IH83_POPTR)
Solyc06g071780.3	0.0397446	-1.02	Dehydration-induced 19-like protein (AHRD V3.3 *** E3T7S4_GOSHI)
Solyc11g027810.2	0.042589	-1.02	RING finger protein (AHRD V3.3 *** A0A0B0PUN2_GOSAR)
Solyc06g007360.3	0.000757151	-1.03	40S ribosomal protein S4 (AHRD V3.3 *** RS4_SOLTU)
Solyc03g007860.1	0.000861877	-1.03	Protein PAM68, chloroplastic (AHRD V3.3 *-* PAM68_ARATH)
Solyc06g062500.3	0.00474665	-1.03	60S ribosomal protein L28, putative (AHRD V3.3 *** B9RKC5_RICCO)
Solyc04g008260.3	0.00591429	-1.03	PURPLE ACID PHOSPHATASE family protein (AHRD V3.3 *** U5G823_POPTR)
Solyc09g013070.3	0.00595013	-1.03	3-oxo-5-alpha-steroid 4-dehydrogenase family protein (AHRD V3.3 *-* AT2G38050.1)
Solyc06g083540.3	0.00810956	-1.03	Alba DNA/RNA-binding protein (AHRD V3.3 *-* AT3G07030.5)
Solyc01g056780.3	0.00873439	-1.03	50S ribosomal protein L34 (AHRD V3.3 *** W9QWL4_9ROSA)
Solyc03g115490.1	0.0134166	-1.03	Complex 1 LYR protein (AHRD V3.3 *** A0A118JYZ0_CYNCS)
Solyc01g079110.3	0.0137718	-1.03	Histone H3 (AHRD V3.3 *** A0A0V0H170_SOLCH)
Solyc10g085550.2	0.0158067	-1.03	Enolase (AHRD V3.3 *-* ENO_SOLLC)
Solyc01g087090.3	0.0176886	-1.03	beta glucosidase 8 (AHRD V3.3 --* AT3G62750.1)
Solyc04g082680.3	0.0200782	-1.03	outer envelope pore-like protein (AHRD V3.3 *** AT1G20816.1)
Solyc10g007440.3	0.0236329	-1.03	Zinc finger family protein, putative (AHRD V3.3 *-* A0A061F333_THECC)
Solyc04g071085.1	0.0236362	-1.03	Hydroxyproline-rich glycoprotein (AHRD V3.3 *** Q8H9E0_SOLTU)
Solyc09g098510.3	0.0265062	-1.03	Extensin (Class I) (AHRD V3.3 *-* Q01945_SOLLC)
Solyc03g033590.1	0.0289441	-1.03	SAUR-like auxin-responsive protein family (AHRD V3.3 *** AT4G34760.1)
Solyc04g074545.1	0.0303188	-1.03	RAD3-like DNA-binding helicase protein (AHRD V3.3 --* AT1G79890.3)
Solyc07g043170.3	0.0306754	-1.03	Glycosyltransferase (AHRD V3.3 *** K4CEH7_SOLLC)
Solyc04g049970.3	0.0309555	-1.03	complex 1 protein, LYR family protein (AHRD V3.3 *** AT5G51960.2),Pfam:PF13233
Solyc01g096800.3	0.0322256	-1.03	PETER PAN-like protein (AHRD V3.3 *** AT5G61770.3)
Solyc02g077770.3	0.0328029	-1.03	bidirectional amino acid transporter 1 (AHRD V3.3 --* AT2G01170.2)
Solyc02g077910.3	0.0379238	-1.03	Mitochondrial carrier protein, expressed (AHRD V3.3 *** A0A0K9PZC5_ZOSMR)
Solyc07g055310.1	0.0390289	-1.03	Pentatricopeptide repeat-containing protein (AHRD V3.3 *** A0A061E4M2_THECC)
Solyc05g054530.1	0.0408932	-1.03	Transmembrane protein, putative (AHRD V3.3 *** G7KWV5_MEDTR)
Solyc00g022103.1	0.041151	-1.03	Transducin family protein / WD-40 repeat family protein (AHRD V3.3 --* AT5G43930.4)
Solyc08g067390.3	0.0444419	-1.03	EG45-like domain containing protein (AHRD V3.3 *** A0A0B2PHN1_GLYSO)
Solyc09g008175.1	0.0452552	-1.03	SAUR-like auxin-responsive protein family (AHRD V3.3 *-* AT2G28085.1)
Solyc07g017820.2	0.0459977	-1.03	RING/U-box superfamily protein (AHRD V3.3 --* AT4G19670.7)
Solyc11g065760.2	0.0470818	-1.03	TK1-like deoxyribonucleoside kinase
Solyc05g053000.1	0.048503	-1.03	AT hook motif DNA-binding family protein (AHRD V3.3 *** A0A072V017_MEDTR)
Solyc00g107055.1	0.0489465	-1.03	Major facilitator superfamily protein (AHRD V3.3 --* AT2G20780.2)
Solyc03g116990.1	0.0492031	-1.03	Protein transport protein Sec61 subunit beta, putative (AHRD V3.3 *** B9SK56_RICCO)
Solyc01g094790.3	3.47613e-07	-1.04	Cysteine synthase (AHRD V3.3 *** K4AZL9_SOLLC)
Solyc04g007900.3	0.00896728	-1.04	Plant cadmium resistance 2, putative (AHRD V3.3 *** A0A061E9L3_THECC)
Solyc06g075620.3	0.010935	-1.04	60S ribosomal protein L35 (AHRD V3.3 *** RL35_EUPES)
Solyc06g051680.1	0.0119787	-1.04	Protein EARLY FLOWERING 4 (AHRD V3.3 *-* A0A0B2RPG0_GLYSO)
Solyc11g008480.2	0.0166454	-1.04	Photosystem II reaction center PsbP family protein (AHRD V3.3 *** AT3G05410.2)
Solyc00g174340.2	0.0232557	-1.04	Pathogenesis-related protein 1 (AHRD V3.3 *** Q75QH2_CAPCH)
Solyc05g053320.1	0.0238766	-1.04	LOW QUALITY:Retrovirus-related Pol polyprotein from transposon TNT 1-94 (AHRD V3.3 *-* A0A151TVZ8_CAJCA),Pfam:PF14223
Solyc03g116247.1	0.0241107	-1.04	Alpha 1,4-glycosyltransferase family protein (AHRD V3.3 *-* Q2MGS1_MEDTR)
Solyc12g056150.2	0.025959	-1.04	Acyl-coenzyme A:6-aminopenicillanic-acid-acyltransferase form (AHRD V3.3 *** A0A1D1Y4A8_9ARAE)
Solyc08g061270.1	0.0315176	-1.04	DUF1677 family protein (DUF1677) (AHRD V3.3 *** AT1G72510.2)
Solyc12g006250.2	0.031572	-1.04	Protein transport protein SFT2, putative (AHRD V3.3 *** B9SF26_RICCO)
Solyc08g007570.3	0.0337462	-1.04	Homeobox-leucine zipper protein HOX9, putative (AHRD V3.3 *** A0A061DUZ5_THECC)
Solyc10g008600.3	0.0360403	-1.04	embryo defective 1923 (AHRD V3.3 *** AT4G28210.1)
Solyc02g085690.3	0.0376314	-1.04	ubiquitin-conjugating enzyme family protein
Solyc04g077570.1	0.0412059	-1.04	LOW QUALITY:Transmembrane protein, putative (AHRD V3.3 *** A0A072V1Y9_MEDTR)
Solyc05g020010.1	0.0419938	-1.04	LOW QUALITY:Photosystem I P700 chlorophyll a apoprotein A2 (AHRD V3.3 *-* PSAB_VITVI)
Solyc12g011030.2	0.0463337	-1.04	xyloglucan endotransglucosylase-hydrolase 9
Solyc08g066350.2	0.0483985	-1.04	Histidine phosphotransfer protein (AHRD V3.3 *** A0A061GBY7_THECC)
Solyc07g056360.1	0.0493039	-1.04	LOW QUALITY:BHLH transcription factor (AHRD V3.3 *-* I1M6X1_SOYBN)
Solyc01g006300.3	0.00347882	-1.05	LECEVI1A
Solyc10g055630.2	0.00527725	-1.05	plasma membrane intrinsic protein 2.9
Solyc09g074570.1	0.00861314	-1.05	Glutaredoxin (AHRD V3.3 *** B3F8F2_SOLTU)
Solyc03g119040.3	0.0112505	-1.05	LeArcA2 protein containing 7 WD40 repeats
Solyc09g082710.3	0.0156799	-1.05	Histone H2A (AHRD V3.3 *** K4CVP7_SOLLC)
Solyc03g117675.1	0.0157385	-1.05	ATP-dependent DNA helicase (AHRD V3.3 *** AT2G24100.1)
Solyc06g053820.3	0.0183113	-1.05	Chloroplast omega-3 fatty acid desaturase (AHRD V3.3 --* Q0GQS4_JATCU)
Solyc06g071260.3	0.0208358	-1.05	Transmembrane protein, putative (AHRD V3.3 *** A0A072US49_MEDTR)
Solyc01g109070.2	0.022726	-1.05	LOW QUALITY:CSL zinc finger domain-containing protein (AHRD V3.3 *** AT2G15910.3)
Solyc08g048540.2	0.0238071	-1.05	Small nuclear ribonucleoprotein family protein (AHRD V3.3 *** AT4G18372.2)
Solyc08g078560.3	0.0238176	-1.05	nuclear fusion defective 6 (AHRD V3.3 --* AT2G20585.7)
Solyc03g112130.1	0.0300756	-1.05	LOW QUALITY:DUF868 family protein (DUF868) (AHRD V3.3 *** AT4G12690.2)
Solyc05g048830.3	0.0367289	-1.05	MYB-related transcription factor (AHRD V3.3 *** A0A059PRS4_SALMI)
Solyc06g034230.2	0.0374163	-1.05	Ubiquitin carboxyl-terminal hydrolase family protein (AHRD V3.3 *-* AT1G71850.1)
Solyc03g112240.1	0.0375332	-1.05	LOW QUALITY:pyrroline-5-carboxylate reductase (AHRD V3.3 *-* AT4G03600.1)
Solyc03g123530.3	0.0380768	-1.05	CCAAT/enhancer-binding zeta (AHRD V3.3 *** A0A0B0MUY0_GOSAR)
Solyc05g050900.3	0.0483778	-1.05	Spindle and kinetochore-associated protein 1 homolog (AHRD V3.3 *** SKA1_ARATH)
Solyc02g063360.3	0.049164	-1.05	Calcium-dependent lipid-binding domain-containing protein (AHRD V3.3 *** F4K8L6_ARATH)
Solyc09g008250.3	0.0492256	-1.05	blind-like1
Solyc09g075290.3	0.00593626	-1.06	60S ribosomal protein L18, putative (AHRD V3.3 *** B9SAT7_RICCO)
Solyc04g081470.3	0.00838481	-1.06	Transcription factor CPC (AHRD V3.3 *-* A0A1D1ZLD7_9ARAE)
Solyc11g068450.2	0.0115381	-1.06	Biogenesis of lysosome-related organelles complex 1 subunit 1 (AHRD V3.3 *** A0A0B2PHL2_GLYSO)
Solyc06g060260.3	0.01194	-1.06	stromal ascorbate peroxidase 7
Solyc01g100430.3	0.0234746	-1.06	rRNA adenine N(6)-methyltransferase (AHRD V3.3 *** K4B177_SOLLC)
Solyc07g006040.3	0.0240903	-1.06	DNA-directed RNA polymerase subunit beta (AHRD V3.3 *** AT4G30845.1)
Solyc05g055780.3	0.031927	-1.06	DNA repair protein RecA, putative (AHRD V3.3 *** A0A072V2Z1_MEDTR)
Solyc06g008940.3	0.0361382	-1.06	Elongation factor Tu (AHRD V3.3 *** K4C3S4_SOLLC)
Solyc01g106810.3	0.0368374	-1.06	ATP phosphoribosyltransferase regulatory subunit (AHRD V3.3 *** AT4G33780.1)
Solyc04g077540.3	0.0369904	-1.06	Kinesin-like protein (AHRD V3.3 *** K4BUJ1_SOLLC)
Solyc12g005230.2	0.0380246	-1.06	Breast carcinoma-amplified sequence 3 (AHRD V3.3 *** A0A0B0NHS9_GOSAR)
Solyc05g006130.3	0.0380791	-1.06	RNA helicase DEAD17
Solyc09g057960.1	0.0489066	-1.06	Cysteine-rich RLK (Receptor-like kinase) protein (AHRD V3.3 *** G7KY09_MEDTR)
Solyc01g104490.3	0.0498412	-1.06	Separase, putative (AHRD V3.3 *** B9SSN4_RICCO)
Solyc04g071615.1	8.20466e-05	-1.07	ASR4 (AHRD V3.3 *** Q2QJT5_SOLLC)
Solyc09g057650.3	0.00533238	-1.07	40S ribosomal protein S8 (AHRD V3.3 *** K4CTF6_SOLLC)
Solyc06g051250.1	0.00855628	-1.07	LOW QUALITY:RING/U-box superfamily protein, putative (AHRD V3.3 *** A0A061FKY9_THECC)
Solyc07g062220.3	0.0122174	-1.07	Trichome birefringence-like protein (AHRD V3.3 *** G7IKB9_MEDTR)
Solyc11g069790.2	0.0137512	-1.07	Chaperonin 60 alpha subunit (AHRD V3.3 *** Q9ZTV1_CANLI)
Solyc08g075160.3	0.0193293	-1.07	Bifunctional purine biosynthesis protein PurH (AHRD V3.3 *** A0A0B2PXS6_GLYSO)
Solyc12g049290.2	0.0238381	-1.07	ELF4-like protein (AHRD V3.3 *** C6ZKI0_SOLLC)
Solyc11g066400.1	0.0240422	-1.07	Zinc finger family protein (AHRD V3.3 *** B9HQP7_POPTR)
Solyc09g058980.3	0.0286367	-1.07	long-chain acyl-CoA synthetase 7 (AHRD V3.3 --* AT5G27600.1)
Solyc09g013140.2	0.0311408	-1.07	Transmembrane protein (AHRD V3.3 *** B7FGN5_MEDTR)
Solyc05g005860.2	0.0321629	-1.07	WAT1-related protein (AHRD V3.3 *** K4BWB3_SOLLC)
Solyc01g100580.3	0.0350944	-1.07	Pentatricopeptide repeat-containing protein, putative (AHRD V3.3 *** B9RNC6_RICCO)
Solyc12g007300.1	0.0380182	-1.07	LOW QUALITY:B3 domain-containing protein, putative (AHRD V3.3 *** A0A061GNJ5_THECC)
Solyc07g065660.3	0.0409445	-1.07	Cellulose synthase family protein (AHRD V3.3 *** B9GFY5_POPTR)
Solyc02g081680.3	0.0485484	-1.07	Nucleolar complex protein 2 like (AHRD V3.3 *** A0A0B2RJJ2_GLYSO)
Solyc08g077410.3	0.0488292	-1.07	Cytochrome c oxidase subunit 6B (AHRD V3.3 *** A0A151TJ10_CAJCA)
Solyc06g005795.1	0.0494674	-1.07	Non-specific lipid-transfer protein (AHRD V3.3 *** M1BVB4_SOLTU)
Solyc05g009370.3	0.00303141	-1.08	50S ribosomal protein L15 (AHRD V3.3 *** A0A072VRA4_MEDTR)
Solyc11g068400.2	0.00319423	-1.08	Cytochrome b-c1 complex subunit 9 (AHRD V3.3 *** QCR9_SOLTU)
Solyc01g094470.3	0.0053663	-1.08	ketose-bisphosphate aldolase class-II family protein (AHRD V3.3 --* AT1G18270.4)
Solyc09g082520.3	0.00729701	-1.08	40S ribosomal protein S3a (AHRD V3.3 *** K4CVM9_SOLLC)
Solyc10g018250.2	0.0102205	-1.08	40S ribosomal protein S13 (AHRD V3.3 *** RS13_SOYBN)
Solyc06g072280.3	0.0150622	-1.08	Small nuclear ribonucleoprotein family protein (AHRD V3.3 *** AT2G18740.1)
Solyc01g094840.3	0.0231587	-1.08	RING/U-box superfamily protein, putative (AHRD V3.3 *** A0A061G5W7_THECC)
Solyc03g059350.3	0.0290243	-1.08	Calcium-transporting ATPase (AHRD V3.3 *-* F4HUS8_ARATH)
Solyc05g052940.3	0.0302804	-1.08	CASP-like protein (AHRD V3.3 *** K4C1X4_SOLLC)
Solyc09g065040.1	0.03084	-1.08	Cysteine-rich receptor-kinase-like protein (AHRD V3.3 *-* A0A072UBL3_MEDTR)
Solyc03g118750.3	0.0331624	-1.08	phosphoethanolamine N-methyltransferase
Solyc11g065600.2	0.0367512	-1.08	xyloglucan endotransglucosylase-hydrolase 4
Solyc03g005200.3	0.0371266	-1.08	Lipid transfer protein (AHRD V3.3 *** G7K520_MEDTR)
Solyc02g079790.3	0.0371451	-1.08	transmembrane protein, putative (Protein of unknown function, DUF538) (AHRD V3.3 *** AT3G07470.3)
Solyc08g080510.3	0.0372457	-1.08	Replication factor C subunit 2 (AHRD V3.3 *** RFC2_ARATH)
Solyc06g006090.1	0.0379103	-1.08	LOW QUALITY:JOSEPHIN-like protein, putative (AHRD V3.3 *-* A0A061GWC4_THECC)
Solyc04g055080.3	0.0415412	-1.08	Major facilitator superfamily transporter (AHRD V3.3 *** A0A0K0KFR2_CARHR)
Solyc10g079090.2	0.00229104	-1.09	Chaperone protein dnaJ, putative (AHRD V3.3 *** B9SL79_RICCO)
Solyc09g075010.3	0.00595101	-1.09	HSP20-like chaperones superfamily protein (AHRD V3.3 *-* AT4G02450.2)
Solyc05g009520.1	0.00624975	-1.09	LOW QUALITY:BnaA06g07410D protein (AHRD V3.3 *** A0A078E7A2_BRANA)
Solyc11g066160.1	0.00853357	-1.09	histone H4 (AHRD V3.3 *** AT2G28740.1)
Solyc03g096960.3	0.0137359	-1.09	LOW QUALITY:D-serine dehydratase (AHRD V3.3 *** A0A1D1XH71_9ARAE)
Solyc02g090420.2	0.0145774	-1.09	LOW QUALITY:50S ribosomal protein L25, putative (AHRD V3.3 *** B9S8K5_RICCO)
Solyc03g078350.3	0.0227337	-1.09	UPF0235 protein C15orf40 like (AHRD V3.3 *** A0A0B2R9A9_GLYSO)
Solyc01g095480.3	0.0231678	-1.09	Exosome complex exonuclease RRP41, putative (AHRD V3.3 *** B9SWZ0_RICCO)
Solyc01g080600.3	0.0231789	-1.09	Histone H3 (AHRD V3.3 *** A0A068VC55_COFCA)
Solyc09g074910.1	0.0235565	-1.09	TSPO(Outer membrane tryptophan-rich sensory protein)-related (AHRD V3.3 *** A0A061DQD9_THECC)
Solyc01g098380.3	0.0239418	-1.09	Dihydrodipicolinate reductase, putative (AHRD V3.3 *** B9T529_RICCO)
Solyc04g079380.1	0.0239522	-1.09	Ribosomal protein S14 (AHRD V3.3 *** A0A1B0THH3_NELNU)
Solyc02g085210.1	0.0296021	-1.09	LOW QUALITY:S-adenosyl-L-methionine-dependent methyltransferases superfamily protein (AHRD V3.3 *** AT1G08125.2)
Solyc12g014355.1	0.0302244	-1.09	Leucine-rich repeat transmembrane protein kinase (AHRD V3.3 *-* AT1G53430.1)
Solyc12g008550.2	0.0360449	-1.09	Peptidase M28 family protein (AHRD V3.3 *-* AT5G19740.1)
Solyc00g136560.3	0.0361247	-1.09	Alkyl transferase (AHRD V3.3 *** K7X479_SOLLC)
Solyc03g121870.3	0.036793	-1.09	Methyltransferase-like protein (AHRD V3.3 *** A0A103XXH9_CYNCS)
Solyc04g009330.3	0.0391186	-1.09	Kinase family protein (AHRD V3.3 *** B9HBC9_POPTR)
Solyc04g055090.1	0.041884	-1.09	LOW QUALITY:Transmembrane protein, putative (AHRD V3.3 *** G7J3T5_MEDTR)
Solyc01g005410.3	0.00599714	-1.1	Caleosin-related family protein (AHRD V3.3 *** AT1G70680.1)
Solyc01g104590.3	0.00811737	-1.1	ribosomal protein L3
Solyc05g047690.3	0.00887057	-1.1	Histone deacetylase complex subunit SAP18 (AHRD V3.3 *** SAP18_ARATH)
Solyc10g083110.2	0.0104839	-1.1	4-hydroxy-tetrahydrodipicolinate synthase (AHRD V3.3 *** K4D398_SOLLC)
Solyc03g121800.3	0.0170624	-1.1	copz1 nonclathrin coat protein zeta1-COP
Solyc01g020440.3	0.0233992	-1.1	Replication factor C subunit 3 (AHRD V3.3 *** RFC3_ARATH)
Solyc05g008520.3	0.0240987	-1.1	Protein DETOXIFICATION (AHRD V3.3 *** K4BX25_SOLLC)
Solyc04g078120.3	0.0271126	-1.1	Ankyrin repeat family protein (AHRD V3.3 *** A0A097PRV4_SOLLC)
Solyc03g097640.3	0.0271788	-1.1	Mitochondrial import inner membrane translocase subunit (AHRD V3.3 *** S8CMW8_9LAMI)
Solyc02g091640.3	0.0301656	-1.1	endoribonuclease E-like protein (AHRD V3.3 *** AT4G37920.1)
Solyc03g116465.1	0.0303907	-1.1	heavy metal atpase 4 (AHRD V3.3 --* AT2G19110.3)
Solyc10g085900.2	0.0367033	-1.1	Tetratricopeptide repeat (TPR)-like superfamily protein (AHRD V3.3 *** AT2G37400.1)
Solyc01g066640.2	0.0380652	-1.1	LOW QUALITY:vitellogenin-like protein (AHRD V3.3 *** AT3G06868.1)
Solyc02g087960.3	0.0380777	-1.1	R2R3MYB transcription factor 94
Solyc05g013170.2	0.0393841	-1.1	GCK domain-containing protein (AHRD V3.3 *-* AT1G14060.1)
Solyc06g050630.3	0.0430812	-1.1	arogenate dehydrogenase (AHRD V3.3 *-* AT5G34930.3)
Solyc03g119600.1	0.00123506	-1.11	LOW QUALITY:NIMIN2b protein (AHRD V3.3 *** Q0MR95_TOBAC)
Solyc11g013130.2	0.00160899	-1.11	cysteine-rich/transmembrane domain protein A (AHRD V3.3 --* AT2G33520.1)
Solyc05g050850.3	0.00218023	-1.11	Bifunctional 6(G)-fructosyltransferase/2,1-fructan:2,1-fructan 1-fructosyltransferase (AHRD V3.3 --* GFT_ALLCE)
Solyc06g007540.3	0.00345634	-1.11	Cytochrome b-c1 complex subunit 8 (AHRD V3.3 *** QCR8_SOLTU)
Solyc04g051820.3	0.00638016	-1.11	RPM1-interacting protein 4 (RIN4) family protein (AHRD V3.3 *** G7LBA7_MEDTR)
Solyc12g008760.2	0.0132673	-1.11	arginine methyltransferase 11 (AHRD V3.3 *** AT4G29510.1)
Solyc10g007650.3	0.0133242	-1.11	DNA-directed RNA polymerases I, II, and III subunit RPABC4 (AHRD V3.3 *** A0A0B2QXH3_GLYSO)
Solyc01g067295.1	0.0160956	-1.11	Metallocarboxypeptidase inhibitor (AHRD V3.3 *** O24373_SOLTU)
Solyc11g068765.1	0.0230251	-1.11	Gb:AAF02129.1, putative (AHRD V3.3 *** A0A061GVZ4_THECC)
Solyc11g013390.2	0.035799	-1.11	GrpE protein homolog (AHRD V3.3 *-* M1A828_SOLTU)
Solyc05g018050.1	0.0368759	-1.11	LOW QUALITY:RING/U-box superfamily protein (AHRD V3.3 *-* AT3G60080.1)
Solyc10g086565.1	0.0378942	-1.11	S-acyltransferase (AHRD V3.3 *** A0A0V0I2F0_SOLCH)
Solyc12g007050.1	0.0417507	-1.11	LOW QUALITY:Arabinogalactan peptide-like protein (AHRD V3.3 *** G7J699_MEDTR)
Solyc02g085360.3	0.0455281	-1.11	CYP90B3 mRNA for cytochrome P450
Solyc03g097170.3	0.0481908	-1.11	Cinnamoyl-CoA reductase, putative (AHRD V3.3 *** B9S247_RICCO)
Solyc06g007890.3	0.0490815	-1.11	Gibberellin-regulated family protein (AHRD V3.3 *** AT1G74670.1)
Solyc11g012320.2	0.0012349	-1.12	SKP1-like 12 (AHRD V3.3 --* AT4G34470.1)
Solyc06g069090.3	0.00616981	-1.12	40S ribosomal protein S7-like protein (AHRD V3.3 *** Q3HRX6_SOLTU)
Solyc01g099410.3	0.00683751	-1.12	Histone H2A (AHRD V3.3 *** G8IIJ5_SOLLC)
Solyc05g046390.3	0.00713509	-1.12	neuronal acetylcholine receptor subunit alpha-5 (AHRD V3.3 *** AT2G31490.1)
Solyc08g074240.3	0.00830413	-1.12	40S ribosomal protein S6 (AHRD V3.3 *** K4CME5_SOLLC)
Solyc01g068190.3	0.00858708	-1.12	HIGH CHLOROPHYLL FLUORESCENCE 153-like protein
Solyc03g121900.1	0.00861526	-1.12	Bifunctional inhibitor/lipid-transfer protein/seed storage 2S albumin superfamily protein (AHRD V3.3 *** AT5G48490.1)
Solyc08g006040.3	0.00873644	-1.12	40S ribosomal protein S6 (AHRD V3.3 *** K4CI93_SOLLC)
Solyc08g061850.3	0.00876972	-1.12	Ribosomal protein S3 family protein (AHRD V3.3 *** AT5G35530.1)
Solyc05g047390.1	0.00878451	-1.12	Mitochondrial import receptor subunit TOM7-1 (AHRD V3.3 *** TOM7A_SOLTU)
Solyc09g082570.3	0.0201654	-1.12	Neurogenic locus notch-like protein (AHRD V3.3 *** A0A072VSF9_MEDTR)
Solyc03g121540.3	0.0222573	-1.12	beta-galactosidase 3
Solyc01g080210.3	0.0240364	-1.12	Ribonucleoside-diphosphate reductase small chain family protein (AHRD V3.3 *** B9HMC3_POPTR)
Solyc04g076220.3	0.0288372	-1.12	AT hook motif DNA-binding family protein (AHRD V3.3 *** G7J554_MEDTR)
Solyc06g069230.3	0.0341036	-1.12	DNA mismatch repair protein (AHRD V3.3 *** Q6DQL7_PETHY)
Solyc03g112100.3	0.0348328	-1.12	high-affinity nitrate transporter-like protein (AHRD V3.3 *** AT4G24715.1)
Solyc05g047680.3	0.0369884	-1.12	Cytochrome P450 (AHRD V3.3 *** F4YF83_9APIA)
Solyc12g008520.2	0.0394984	-1.12	SUN-like protein 32
Solyc03g026230.1	0.0408681	-1.12	Protein DETOXIFICATION (AHRD V3.3 *** K4BF96_SOLLC)
Solyc09g008030.1	0.0411119	-1.12	TCP transcription factor 19
Solyc09g009480.1	0.0476243	-1.12	LOW QUALITY:F-box protein (AHRD V3.3 *-* A0A0P0CKG2_CITMA)
Solyc07g005680.3	0.0476338	-1.12	Carboxypeptidase (AHRD V3.3 *-* K4CB39_SOLLC)
Solyc06g072620.3	0.0486441	-1.12	Bidirectional sugar transporter SWEET (AHRD V3.3 *-* K4C8Y2_SOLLC)
Solyc10g055810.2	0.00164185	-1.13	chitinase Z15140
Solyc01g005840.3	0.00563287	-1.13	ubiquitin-conjugating enzyme E2 -like protein
Solyc07g063860.3	0.00742014	-1.13	transmembrane protein, putative (Protein of unknown function, DUF538) (AHRD V3.3 *** AT3G07460.1)
Solyc02g087330.3	0.00867066	-1.13	B12D (AHRD V3.3 *** D2XQY6_WOLAR)
Solyc04g008460.3	0.0115256	-1.13	SET-domain containing protein lysine methyltransferase family protein (AHRD V3.3 --* AT5G43990.9)
Solyc01g086820.3	0.0130544	-1.13	Histone H3 (AHRD V3.3 *** A0A068VC55_COFCA)
Solyc04g074150.2	0.0203863	-1.13	Protein trm112, putative (AHRD V3.3 *** B9SWY6_RICCO)
Solyc03g007540.3	0.0229974	-1.13	tRNA dimethylallyltransferase (AHRD V3.3 *** AT5G52960.1)
Solyc02g063440.3	0.0230981	-1.13	cysteine-rich/transmembrane domain A-like protein (AHRD V3.3 -** AT2G32210.1)
Solyc07g065940.1	0.0231859	-1.13	Transmembrane protein, putative (AHRD V3.3 *** G7K4U4_MEDTR)
Solyc10g084810.2	0.0233099	-1.13	S-acyltransferase (AHRD V3.3 *** M1ARM4_SOLTU)
Solyc12g038605.1	0.0237547	-1.13	LINE-1 reverse transcriptase (AHRD V3.3 --* A0A1D1ZAL7_9ARAE)
Solyc04g051580.3	0.0239305	-1.13	(DB244) meloidogyne-induced giant cell protein
Solyc02g094190.3	0.0250017	-1.13	Major facilitator superfamily protein (AHRD V3.3 *** AT3G01930.2)
Solyc09g005250.3	0.0257659	-1.13	Vacuolar cation/proton exchanger 3 (AHRD V3.3 *** A0A0B2SDY1_GLYSO)
Solyc01g073725.1	0.0369968	-1.13	ATPase, V1 complex, subunit B protein (AHRD V3.3 --* AT4G38510.5)
Solyc01g065710.3	0.0380325	-1.13	CST complex subunit TEN1 (AHRD V3.3 *** A0A0B0NF61_GOSAR)
Solyc06g068570.3	0.039525	-1.13	AP2-like ethylene-responsive transcription factor
Solyc04g057997.1	0.0406021	-1.13	30S ribosomal protein S8, putative (AHRD V3.3 *-* B9SR47_RICCO)
Solyc12g100280.2	0.0482184	-1.13	NAD(P)-binding Rossmann-fold superfamily protein (AHRD V3.3 *** AT3G55310.1)
Solyc11g005270.1	0.0482699	-1.13	LOW QUALITY:Glutaredoxin family protein (AHRD V3.3 *** AT5G13810.1)
Solyc06g065180.3	0.00511384	-1.14	SLL1 protein (AHRD V3.3 *** I3S1M4_MEDTR)
Solyc01g103220.3	0.00571249	-1.14	Cytochrome c (AHRD V3.3 *** CYC_SOLTU)
Solyc02g070310.3	0.00616886	-1.14	60S ribosomal protein L32 (AHRD V3.3 *** D7MRE7_ARALL)
Solyc04g082050.3	0.00701106	-1.14	Ganglioside-induced differentiation-associated protein 2 (AHRD V3.3 *** A0A199VGA4_ANACO)
Solyc03g005227.1	0.00770952	-1.14	Histone H2A (AHRD V3.3 *** K4BDU6_SOLLC)
Solyc08g075090.3	0.00848437	-1.14	bHLH transcription factor144
Solyc01g096475.1	0.0137314	-1.14	Thioredoxin-like protein CITRX, chloroplastic (AHRD V3.3 *** CITRX_SOLLC)
Solyc05g007980.3	0.0205412	-1.14	Sulfate transporter, putative (AHRD V3.3 *** B9SJ59_RICCO)
Solyc08g013750.3	0.0213313	-1.14	F-box family protein (AHRD V3.3 *-* D7M2J7_ARALL)
Solyc03g118755.1	0.0234274	-1.14	Phosphoethanolamine N-methyltransferase (AHRD V3.3 *** Q9AXH3_SOLLC),Pfam:PF13489
Solyc01g088390.3	0.0238716	-1.14	Sister chromatid cohesion protein DCC1 (AHRD V3.3 *** A0A072TGP8_MEDTR)
Solyc03g025190.4	0.0270183	-1.14	anthocyanin permease
Solyc07g062120.3	0.0278356	-1.14	Bidirectional sugar transporter SWEET (AHRD V3.3 *** K4CGP5_SOLLC)
Solyc06g048930.3	0.0302061	-1.14	Tomato Response regulator 16,17
Solyc07g054315.1	0.0347711	-1.14	Tuliposide A-converting enzyme 1, chloroplastic (AHRD V3.3 --* TCEA1_TULGE)
Solyc04g011767.1	0.0362613	-1.14	Pentatricopeptide repeat-containing protein At5g14770, mitochondrial (AHRD V3.3 --* PP381_ARATH)
Solyc02g022880.1	0.0369829	-1.14	purple acid phosphatase 25 (AHRD V3.3 --* AT4G36350.1)
Solyc01g066850.3	0.0414309	-1.14	WAT1-related protein (AHRD V3.3 *** K4AWT5_SOLLC)
Solyc09g011010.3	6.08575e-08	-1.15	Photosystem II 22 kDa protein, chloroplastic (AHRD V3.3 --* PSBS_SPIOL)
Solyc04g009540.1	0.00241524	-1.15	Ribosomal protein L10 (AHRD V3.3 *** A0A124SGM8_CYNCS)
Solyc07g041310.3	0.00312193	-1.15	Ribosomal protein S3 family protein (AHRD V3.3 *** AT5G35530.1)
Solyc06g072440.3	0.00367319	-1.15	B-cell receptor-associated-like protein (AHRD V3.3 *** G7JZ88_MEDTR)
Solyc07g007280.3	0.00473894	-1.15	chlororespiratory reduction 6 (AHRD V3.3 *** AT2G47910.2)
Solyc05g053780.3	0.00869996	-1.15	RNA binding protein-like protein (AHRD V3.3 *** Q3HVL3_SOLTU)
Solyc11g006350.1	0.0225898	-1.15	aspatate carbamoyltransferase
Solyc11g071290.2	0.0232418	-1.15	Alcohol dehydrogenase (AHRD V3.3 *** I6N8Z5_OLEEU)
Solyc04g024430.3	0.0238558	-1.15	DNA polymerase epsilon catalytic subunit (AHRD V3.3 --* AT1G08260.1)
Solyc07g041245.1	0.0241119	-1.15	aldolase like (AHRD V3.3 --* AT4G24080.1)
Solyc11g005350.2	0.02768	-1.15	WAT1-related protein (AHRD V3.3 *** K4D4E8_SOLLC)
Solyc11g007730.2	0.0282829	-1.15	Bark storage protein A (AHRD V3.3 *** W9SCI4_9ROSA)
Solyc02g079390.3	0.0299381	-1.15	Plant cadmium resistance 8-like protein (AHRD V3.3 *** A0A0B0NN69_GOSAR)
Solyc11g005340.2	0.030117	-1.15	Plastid-lipid associated protein PAP / fibrillin family protein (AHRD V3.3 *** AT5G09820.2)
Solyc08g006080.1	0.0340573	-1.15	Exostosin-like 3 (AHRD V3.3 *** W9S9Z8_9ROSA)
Solyc10g052540.1	0.0386599	-1.15	Small auxin up-regulated RNA73
Solyc05g014150.3	0.0395666	-1.15	NAD(P)-binding Rossmann-fold superfamily protein (AHRD V3.3 *-* AT3G55290.2)
Solyc07g038190.3	0.0452198	-1.15	WAS/WASL-interacting family protein (AHRD V3.3 *** AT1G55160.2)
Solyc00g244290.1	0.0481936	-1.15	LOW QUALITY:NADH dehydrogenase subunit 2 (AHRD V3.3 *-* A0A1C9I9Q6_9ROSI)
Solyc10g007870.3	0.0487872	-1.15	Thionin-like protein (AHRD V3.3 *** G1JZD6_TOBAC)
Solyc01g099630.3	0.00301496	-1.16	xyloglucan endotransglucosylase-hydrolase 1
Solyc11g065680.1	0.00349689	-1.16	transmembrane protein (AHRD V3.3 *** AT2G01870.1)
Solyc10g078450.2	0.00400431	-1.16	Small nuclear ribonucleoprotein family protein (AHRD V3.3 *** AT2G43810.3)
Solyc06g063220.3	0.00434839	-1.16	ATP synthase subunit epsilon, mitochondrial (AHRD V3.3 *** ATP5E_IPOBA)
Solyc03g110870.3	0.00857374	-1.16	RING/U-box superfamily protein (AHRD V3.3 --* AT4G35840.2)
Solyc11g071810.2	0.00872484	-1.16	fasciated
Solyc07g008660.3	0.0089148	-1.16	30S ribosomal protein S16 (AHRD V3.3 *** B3IWG3_SOLLC)
Solyc06g082650.3	0.01123	-1.16	60S ribosomal protein L10 (AHRD V3.3 *** RL10_SOLME)
Solyc01g095610.3	0.0115057	-1.16	protein trichome birefringence-like 25
Solyc04g015030.3	0.0149955	-1.16	Heavy metal transport/detoxification superfamily protein (AHRD V3.3 *** I3STQ6_MEDTR)
Solyc04g014790.1	0.0222554	-1.16	Cysteine proteinase inhibitor (AHRD V3.3 *** K4BPY2_SOLLC)
Solyc01g008290.3	0.0231359	-1.16	Dihydroorotate dehydrogenase (quinone), mitochondrial (AHRD V3.3 *** K4AT27_SOLLC)
Solyc03g111935.1	0.024001	-1.16	Cytochrome P450, putative (AHRD V3.3 *** B9RAS2_RICCO)
Solyc01g007250.3	0.0314556	-1.16	U3 small nucleolar ribonucleoprotein protein imp4, putative (AHRD V3.3 *** B9RGD5_RICCO)
Solyc02g087210.3	0.0323207	-1.16	Zinc finger AN1 domain-containing stress-associated protein 12 (AHRD V3.3 *** A0A151RAZ5_CAJCA)
Solyc04g009840.3	0.0368063	-1.16	TRICHOME BIREFRINGENCE-LIKE 5 (AHRD V3.3 --* AT5G20590.2)
Solyc03g116510.1	0.0480766	-1.16	cotton fiber protein (AHRD V3.3 *** AT1G15385.1)
Solyc01g095530.2	0	-1.17	LOW QUALITY:cytoplasmic tRNA 2-thiolation protein (AHRD V3.3 *** AT3G55570.1)
Solyc06g069010.3	0.00273048	-1.17	LeArcA1 protein
Solyc08g077280.1	0.00307684	-1.17	allyl alcohol dehydrogenase-like protein (AHRD V3.3 *** AT3G59840.1)
Solyc06g059870.1	0.00399204	-1.17	subunit of exocyst complex 8 (AHRD V3.3 --* AT3G10380.2)
Solyc11g006690.1	0.0059298	-1.17	40S ribosomal protein S17 (AHRD V3.3 *** RS17_SOLLC)
Solyc03g019780.3	0.00596067	-1.17	40S ribosomal protein SA (AHRD V3.3 *** K4BEV0_SOLLC)
Solyc10g005470.3	0.0132912	-1.17	receptor-interacting protein (AHRD V3.3 *** AT4G21445.1)
Solyc01g010540.3	0.0136634	-1.17	40S ribosomal protein S9, putative (AHRD V3.3 *** Q60CZ2_SOLDE)
Solyc03g095220.3	0.0156646	-1.17	Translocase of chloroplast (AHRD V3.3 *** A0A0V0I1D8_SOLCH)
Solyc09g014860.3	0.0157227	-1.17	LURP-one-like protein (AHRD V3.3 *** G7KW19_MEDTR)
Solyc03g013250.3	0.0200642	-1.17	Imidazole glycerol phosphate synthase subunit HisH (AHRD V3.3 *** A0A1D1ZHQ6_9ARAE)
Solyc11g072840.1	0.0219695	-1.17	histone H4 (AHRD V3.3 *** AT2G28740.1)
Solyc01g108060.2	0.0220128	-1.17	Methylcrotonyl-CoA carboxylase beta chain, putative (AHRD V3.3 *-* A0A072UYJ8_MEDTR)
Solyc12g099570.2	0.0222626	-1.17	meiotically up-regulated protein (AHRD V3.3 --* AT5G66930.2)
Solyc04g049660.2	0.0230275	-1.17	DVA-1 polyprotein (AHRD V3.3 *** A0A0B0N1N3_GOSAR)
Solyc12g010960.2	0.0234819	-1.17	NADP-dependent alkenal double bond reductase (AHRD V3.3 *** A0A072TLD5_MEDTR)
Solyc02g069770.3	0.0239621	-1.17	WD40-repeat domain-contaning protein
Solyc06g082880.2	0.0335244	-1.17	Pentatricopeptide repeat-containing protein, putative (AHRD V3.3 *** B9T5G9_RICCO)
Solyc03g025470.3	0.0384209	-1.17	Kinesin-like protein (AHRD V3.3 *** E5GCU2_CUCME)
Solyc03g080100.3	0.0402883	-1.17	Heavy metal transport/detoxification superfamily protein (AHRD V3.3 *-* AT5G24580.4)
Solyc03g005910.3	0.0410621	-1.17	Lipase, GDSL (AHRD V3.3 *** A0A103XTV4_CYNCS)
Solyc01g079950.3	0.0449658	-1.17	Xyloglucan-specific endoglucanase inhibitor protein 2 (AHRD V3.3 *** F1DHN5_SOLTU)
Solyc10g008570.3	0.0476876	-1.17	Pentatricopeptide repeat-containing protein (AHRD V3.3 *** A0A124SD53_CYNCS)
Solyc11g039950.2	0.0483729	-1.17	Ca(2+)-dependent nuclease family protein (AHRD V3.3 --* AT2G40410.2)
Solyc10g078630.2	0.00348905	-1.18	40S ribosomal protein S28 (AHRD V3.3 *-* W9SEX7_9ROSA)
Solyc09g010562.1	0.00865559	-1.18	dolichyl-diphosphooligosaccharide-protein glycosyltransferase subunit (AHRD V3.3 *-* AT3G09455.2)
Solyc01g009990.3	0.00979969	-1.18	Peptidyl-prolyl cis-trans isomerase (AHRD V3.3 *** K4ATJ4_SOLLC)
Solyc12g013510.1	0.0216343	-1.18	Histone H2B (AHRD V3.3 *** K4DCN6_SOLLC)
Solyc04g007000.1	0.0228551	-1.18	AP2/B3 transcription factor family protein (AHRD V3.3 *** AT1G25560.1)
Solyc01g006450.3	0.0235758	-1.18	Enoyl reductase (AHRD V3.3 *** P93062_BRANA)
Solyc12g042700.2	0.0238741	-1.18	tyrosine sulfotransferase-like protein (AHRD V3.3 *** AT4G22000.1)
Solyc02g072170.3	0.0239217	-1.18	Transcription factor TGA2 (AHRD V3.3 --* TGA2_ARATH)
Solyc03g110990.1	0.0290588	-1.18	LOW QUALITY:alpha/beta-Hydrolases superfamily protein (AHRD V3.3 --* AT3G23540.3)
Solyc01g111590.3	0.0327343	-1.18	Transducin family protein / WD-40 repeat family protein (AHRD V3.3 *** AT2G16780.1)
Solyc06g075310.3	0.0351837	-1.18	Adenylate kinase isoenzyme 6 homolog (AHRD V3.3 *** M1ABZ6_SOLTU)
Solyc03g114520.3	0.0368168	-1.18	Kinetochore protein (AHRD V3.3 *** D0FYH3_NICTO)
Solyc03g122140.3	0.0376239	-1.18	Peroxisomal (S)-2-hydroxy-acid oxidase (AHRD V3.3 *** GOX_SPIOL)
Solyc08g075930.3	0.0379223	-1.18	Kinesin-like protein (AHRD V3.3 *-* G7K6T5_MEDTR)
Solyc11g072630.2	0.0380168	-1.18	mitogen-activated protein kinase 4
Solyc03g005260.3	2.9976e-15	-1.19	ATP-sulfurylase (AHRD V3.3 *** Q1W2K0_CAMSI)
Solyc09g010330.3	0.0029432	-1.19	Nascent polypeptide-associated complex subunit beta (AHRD V3.3 *** K4CR60_SOLLC)
Solyc01g097360.3	0.0034768	-1.19	Coiled-coil domain-containing protein 14 (AHRD V3.3 *** A0A1D1XHZ9_9ARAE)
Solyc01g110540.3	0.00550751	-1.19	protein Aucsia-2
Solyc05g024430.3	0.00584008	-1.19	transmembrane protein (AHRD V3.3 *** AT4G13500.1)
Solyc06g065590.3	0.00729961	-1.19	60S ribosomal protein L18a (AHRD V3.3 *** K4C7I8_SOLLC)
Solyc06g060080.2	0.00849962	-1.19	Mitochondrial ATP synthase 6 kDa subunit (AHRD V3.3 *** A0A0K9PE24_ZOSMR)
Solyc01g091220.3	0.00875353	-1.19	40S ribosomal protein S13 (AHRD V3.3 *** RS13_SOYBN)
Solyc01g007230.3	0.00896878	-1.19	Late embryogenesis abundant (LEA) hydroxyproline-rich glycoprotein family, putative (AHRD V3.3 *** A0A061F1P4_THECC)
Solyc08g016670.3	0.0168275	-1.19	Calcyclin-binding protein, putative (AHRD V3.3 *** B9S113_RICCO)
Solyc03g079930.3	0.0173128	-1.19	Mitochondrial glycoprotein (AHRD V3.3 *** A0A103YDB4_CYNCS)
Solyc10g061950.2	0.0174707	-1.19	Light-independent protochlorophyllide reductase subunit B (AHRD V3.3 --* A0A097KN01_9CHLO)
Solyc02g038750.3	0.0222335	-1.19	transducin family protein / WD-40 repeat family protein (AHRD V3.3 *** AT2G34260.1)
Solyc09g082870.2	0.0230519	-1.19	Calcium-transporting ATPase (AHRD V3.3 *** M1DTS0_SOLTU)
Solyc01g005460.3	0.0232059	-1.19	Dynein light chain (AHRD V3.3 *** W9T250_9ROSA)
Solyc05g012080.3	0.0240063	-1.19	cytochrome b5 isoform B
Solyc02g082850.3	0.0240509	-1.19	Serine acetyltransferase (AHRD V3.3 *** G7K010_MEDTR)
Solyc03g111130.1	0.0248155	-1.19	Malate synthase (AHRD V3.3 *** K4BJX6_SOLLC)
Solyc09g075530.3	0.0302311	-1.19	Syntaxin (AHRD V3.3 *** A0A0A0YT45_ALBBR)
Solyc10g081940.2	0.0373223	-1.19	Exocyst complex component 7 (AHRD V3.3 *** A0A151RD29_CAJCA)
Solyc01g110610.3	0.0412506	-1.19	SAUR-like auxin-responsive protein family (AHRD V3.3 *** AT1G75580.1)
Solyc02g089890.3	0.046054	-1.19	PQ-loop repeat family protein / transmembrane family protein (AHRD V3.3 *** AT4G36850.1)
Solyc11g069440.1	0.00301546	-1.2	60S ribosomal protein L12 (AHRD V3.3 *** Q6RJY1_CAPAN)
Solyc05g054540.3	0.00569418	-1.2	ubiquitin-conjugating enzyme E2 (AHRD V3.3 *** AT5G59300.1)
Solyc09g097805.1	0.00698454	-1.2	Glycine rich protein (AHRD V3.3 *** Q94CG1_TOBAC)
Solyc01g098000.3	0.00861719	-1.2	Elongation factor 1-beta (AHRD V3.3 *** D7KES3_ARALL)
Solyc02g068650.2	0.0222003	-1.2	tRNA (guanine-N(7)-)-methyltransferase (AHRD V3.3 *** K4B7J7_SOLLC)
Solyc03g097020.3	0.023939	-1.2	AAA-type ATPase family protein
Solyc02g088740.1	0.0293147	-1.2	LOW QUALITY:Transcription factor bHLH151, putative (AHRD V3.3 *** A0A061EF71_THECC)
Solyc01g080100.3	0.0342277	-1.2	LOW QUALITY:RING zinc finger protein, putative (AHRD V3.3 *** A0A072USX7_MEDTR)
Solyc11g007000.2	0.0369425	-1.2	Cytochrome c oxidase assembly protein COX15 (AHRD V3.3 *** COX15_ARATH)
Solyc05g015410.3	0.0370205	-1.2	Transposon protein, putative, CACTA, En/Spm sub-class (AHRD V3.3 --* Q2R0Q5_ORYSJ)
Solyc12g013830.2	0.0482772	-1.2	Metallothionein (AHRD V3.3 -** B8YM44_SOLNI)
Solyc02g067580.3	0.00592551	-1.21	B12D (AHRD V3.3 *** D2XQY6_WOLAR)
Solyc01g107330.3	0.0101137	-1.21	SWIB_MDM2 domain protein
Solyc10g081240.2	0.013715	-1.21	GrpE protein homolog (AHRD V3.3 *** K4D311_SOLLC)
Solyc06g084310.3	0.0139169	-1.21	Small nuclear ribonucleoprotein Sm D1 (AHRD V3.3 *-* A0A199VU58_ANACO)
Solyc01g107520.3	0.0171803	-1.21	Plant basic secretory family protein (AHRD V3.3 *** B9GHT3_POPTR)
Solyc09g011650.3	0.0174345	-1.21	Glutathione S-transferase (AHRD V3.3 *** A0A0N9HTE9_HELAN)
Solyc00g127670.2	0.0238511	-1.21	membrane protein (AHRD V3.3 *** AT1G26180.1)
Solyc07g021630.3	0.0377523	-1.21	SlBCAT2
Solyc06g061280.3	0.040776	-1.21	Cinnamoyl-CoA reductase, putative (AHRD V3.3 *** B9S247_RICCO)
Solyc06g071890.3	0.0411605	-1.21	Mitochondrial pyruvate carrier (AHRD V3.3 *** K4C8R1_SOLLC)
Solyc03g097750.3	0.0497274	-1.21	Translocon-associated protein subunit beta (AHRD V3.3 *** A0A0D2RZS2_GOSRA),Pfam:PF05753
Solyc04g074230.3	9.48938e-09	-1.22	SIG74 14-3-3 family protein
Solyc07g008720.4	0.000945658	-1.22	BTF3-like transcription factor
Solyc03g117560.3	0.00319676	-1.22	Blue copper-like protein (AHRD V3.3 *** B8Y8A0_GOSHI)
Solyc03g080160.3	0.0078764	-1.22	Nascent polypeptide associated complex alpha subunit, putative (AHRD V3.3 *-* B9S5M4_RICCO)
Solyc12g088840.1	0.0100563	-1.22	LOW QUALITY:Calcium-binding EF-hand family protein, putative (AHRD V3.3 *** A0A061FAV4_THECC)
Solyc11g066430.1	0.0111827	-1.22	histone H2B
Solyc03g032060.1	0.0157169	-1.22	RING/U-box superfamily protein (AHRD V3.3 *** AT1G20823.1)
Solyc11g064750.2	0.0178842	-1.22	Pentatricopeptide repeat-containing family protein (AHRD V3.3 *** B9H819_POPTR)
Solyc04g007780.3	0.0181419	-1.22	MLP (AHRD V3.3 *** G8DRV9_GOSBA)
Solyc12g008830.2	0.0190964	-1.22	GATA-like transcription factor (AHRD V3.3 *** I3VFF1_TOBAC)
Solyc05g054840.3	0.0231127	-1.22	E3 UFM1-protein ligase (AHRD V3.3 *-* A0A199V584_ANACO)
Solyc01g080890.2	0.0239336	-1.22	KH domain-containing protein / zinc finger (CCCH type) family protein (AHRD V3.3 --* AT5G06770.6)
Solyc12g005310.2	0.0239894	-1.22	Auxin-responsive GH3 family protein (AHRD V3.3 *** AT5G54510.1)
Solyc06g067950.3	0.0280253	-1.22	Acyl-protein thioesterase 2 (AHRD V3.3 *** A0A0B0PZC3_GOSAR)
Solyc10g051120.2	0.0296308	-1.22	Mitochondrial pyruvate carrier (AHRD V3.3 *-* M1AEY6_SOLTU)
Solyc11g071960.2	0.036706	-1.22	Sulfhydryl oxidase (AHRD V3.3 *** K4DAQ3_SOLLC)
Solyc12g097000.2	0.0407718	-1.22	TIR-NBS-LRR class disease resistance protein (AHRD V3.3 *-* A2I7Q5_9ROSI)
Solyc08g016180.3	0.00469311	-1.23	60S ribosomal protein L18a (AHRD V3.3 *** K4CJE2_SOLLC)
Solyc06g050120.3	0.0075326	-1.23	60S ribosomal protein L7A-like (AHRD V3.3 *** Q2VCI3_SOLTU)
Solyc04g063290.3	0.00829347	-1.23	40S ribosomal protein S2 (AHRD V3.3 *** K7WJZ4_SOLTU)
Solyc05g055640.3	0.00944676	-1.23	ARM repeat superfamily protein (AHRD V3.3 --* AT1G12930.1)
Solyc05g006110.3	0.0124276	-1.23	Serine/Threonine-kinase (AHRD V3.3 *** AT1G10522.2)
Solyc12g056090.2	0.0185339	-1.23	Cox19-like CHCH family protein (AHRD V3.3 *-* AT4G23760.1)
Solyc01g104070.3	0.023564	-1.23	ARM repeat superfamily protein (AHRD V3.3 *** AT4G27640.1)
Solyc12g036650.2	0.0236867	-1.23	translocase subunit seca (AHRD V3.3 *** AT1G68490.1)
Solyc01g008460.3	0.0238724	-1.23	Ferredoxin (AHRD V3.3 *** Q70SW4_DIGLA)
Solyc11g072830.1	0.0239448	-1.23	Chitinase (AHRD V3.3 *** G7KL79_MEDTR)
Solyc08g081150.3	0.0240685	-1.23	GMP synthase (AHRD V3.3 *** W8TFM6_TOBAC)
Solyc09g091420.3	0.0243267	-1.23	Inosine triphosphate pyrophosphatase (AHRD V3.3 *** K4CWG8_SOLLC)
Solyc11g010930.2	0.0286831	-1.23	HVA22-like protein (AHRD V3.3 *** M1BBW7_SOLTU)
Solyc06g084580.1	0.0297777	-1.23	Pentatricopeptide repeat-containing protein family (AHRD V3.3 *** A0A151SD09_CAJCA)
Solyc05g007450.3	0.0337976	-1.23	Origin recognition complex, subunit 6 (AHRD V3.3 *** A0A118K386_CYNCS)
Solyc06g064560.3	0.0339516	-1.23	UvrABC system protein C (AHRD V3.3 *** A0A1D1YTR9_9ARAE)
Solyc03g006220.3	0.0408543	-1.23	Trichome birefringence-like protein (AHRD V3.3 *** G7IKB9_MEDTR)
Solyc05g026377.1	0.0484967	-1.23	K(+) efflux antiporter (AHRD V3.3 *-* A0A0K9NUN8_ZOSMR)
Solyc12g042080.2	0.00113813	-1.24	40s ribosomal protein S11 (AHRD V3.3 *** K7XKQ3_SOLTU)
Solyc12g039120.2	0.00300665	-1.24	40S ribosomal protein S19-like (AHRD V3.3 *** Q2VCJ6_SOLTU)
Solyc10g078660.2	0.00482858	-1.24	60S ribosomal protein L24 (AHRD V3.3 *** B9MYJ4_POPTR)
Solyc06g072120.3	0.00509367	-1.24	40S ribosomal protein SA (AHRD V3.3 *** K4C8T4_SOLLC)
Solyc02g070330.3	0.00511292	-1.24	40S ribosomal protein S4 (AHRD V3.3 *-* RS4_SOLTU)
Solyc11g005050.2	0.0052581	-1.24	Mitochondrial ATP synthase 6 kDa subunit (AHRD V3.3 *** A0A0K9PE24_ZOSMR)
Solyc09g091740.3	0.00580738	-1.24	60S ribosomal protein L13a-like protein (AHRD V3.3 *** Q3HRW1_SOLTU)
Solyc02g086240.3	0.00596474	-1.24	Ribosomal L5P family protein (AHRD V3.3 *** AT5G45775.2)
Solyc01g011000.3	0.00640297	-1.24	Eukaryotic translation initiation factor 5A (AHRD V3.3 *** K4BNF7_SOLLC)
Solyc01g073970.3	0.00823242	-1.24	Histone H3 (AHRD V3.3 *** A0A068VC55_COFCA)
Solyc12g098940.2	0.0106335	-1.24	Ubiquitin, putative (AHRD V3.3 *** B9RN74_RICCO)
Solyc11g018560.2	0.0149612	-1.24	50S ribosomal protein L25, putative (AHRD V3.3 *** B9RCJ6_RICCO)
Solyc10g008320.1	0.0182354	-1.24	LOW QUALITY:phosphatidic acid phosphatase 1 (AHRD V3.3 --* AT2G01180.6)
Solyc12g039170.1	0.0241051	-1.24	LOW QUALITY:potassium transporter 2 (AHRD V3.3 --* AT2G40540.5)
Solyc02g055370.3	0.0380346	-1.24	Transcriptional factor B3 family protein (AHRD V3.3 *-* AT4G31650.2)
Solyc03g111360.3	0.0491815	-1.24	Oxygen-independent coproporphyrinogen III oxidase, putative (AHRD V3.3 *** A0A072V9X5_MEDTR)
Solyc06g007470.3	0.000801176	-1.25	40S ribosomal S26-like protein (AHRD V3.3 *** I3S2G2_MEDTR)
Solyc11g011010.1	0.00338645	-1.25	LOW QUALITY:B-cell receptor-associated-like protein (AHRD V3.3 *** AT5G17190.1)
Solyc01g009520.3	0.00858886	-1.25	Ribosomal protein (AHRD V3.3 *** K4ATE8_SOLLC)
Solyc12g099960.1	0.0100773	-1.25	LOW QUALITY:Ribosomal-like protein, putative (AHRD V3.3 *** I3RZK0_MEDTR)
Solyc02g082190.3	0.0213756	-1.25	CTP synthase (AHRD V3.3 *** M1B2B1_SOLTU)
Solyc05g014160.3	0.0232363	-1.25	REGULATOR OF G-PROTEIN SIGNALING 1 (AHRD V3.3 *-* AT3G26090.2)
Solyc06g008020.3	0.0239458	-1.25	HIT zinc finger protein (AHRD V3.3 *** A0A072VLZ0_MEDTR)
Solyc01g066200.1	0.0295591	-1.25	LOW QUALITY:Glucan endo-1,3-beta-glucosidase 8 (AHRD V3.3 --* W9S9M9_9ROSA)
Solyc12g056760.2	0.0333086	-1.25	Eukaryotic translation initiation factor 3 subunit C (AHRD V3.3 *** A0A1D1ZH74_9ARAE)
Solyc11g067150.2	0.0378034	-1.25	transmembrane protein (AHRD V3.3 *** AT4G04190.1)
Solyc01g081000.3	0.0412238	-1.25	Phosphatase 2C family protein, putative (AHRD V3.3 *** A0A061GDE7_THECC)
Solyc02g094630.3	0.0425434	-1.25	Transportin-3, putative (AHRD V3.3 *-* B9RGS4_RICCO)
Solyc04g078660.1	0.0446266	-1.25	LOW QUALITY:HXXXD-type acyl-transferase family protein (AHRD V3.3 *** AT5G42830.1)
Solyc06g034370.1	0.0484164	-1.25	Plant invertase/pectin methylesterase inhibitor superfamily protein (AHRD V3.3 *** AT5G62350.1)
Solyc02g083570.3	0	-1.26	Ubiquitin-conjugating enzyme E2 (AHRD V3.3 *** G7JMD8_MEDTR)
Solyc06g064470.3	0.00468523	-1.26	60S ribosomal protein L7A-like protein (AHRD V3.3 *** Q2XPW4_SOLTU)
Solyc02g062240.3	0.00816423	-1.26	Small nuclear ribonucleoprotein (AHRD V3.3 *** G7LBD3_MEDTR)
Solyc11g072730.2	0.0234115	-1.26	DNA-directed RNA polymerase subunit (AHRD V3.3 *** K4DAY0_SOLLC)
Solyc01g044240.3	0.0237227	-1.26	Soluble inorganic pyrophosphatase 1 (AHRD V3.3 --* IPYR1_ARATH)
Solyc01g110605.1	0.0239404	-1.26	SAUR-like auxin-responsive protein family (AHRD V3.3 *** AT4G34760.1)
Solyc01g094220.3	0.0239416	-1.26	carbonyl reductase-like
Solyc01g005230.3	0.0241456	-1.26	S-adenosyl-L-methionine-dependent methyltransferase superfamily protein (AHRD V3.3 *** AT5G37990.1)
Solyc05g026420.1	0.0349916	-1.26	Ferritin-2, chloroplastic (AHRD V3.3 --* FRI2_SOYBN)
Solyc05g054140.3	0.0365384	-1.26	DNA-directed RNA polymerase I subunit rpa43-like protein (AHRD V3.3 *** T2DMP5_PHAVU)
Solyc04g081350.3	0.0373015	-1.26	E2F transcription factor (AHRD V3.3 *** G7IE33_MEDTR)
Solyc10g009507.1	0.0376538	-1.26	Anthocyanidin reductase (AHRD V3.3 *** A0A0B2S8U0_GLYSO)
Solyc02g062230.1	0.0385783	-1.26	Small auxin up-regulated RNA32
Solyc09g059950.3	0.0401696	-1.26	Amino acid--[acyl-carrier-protein] ligase (AHRD V3.3 *** A0A0B0MIR3_GOSAR)
Solyc06g075350.2	0.0464039	-1.26	tRNA-splicing endonuclease subunit Sen2 (AHRD V3.3 *** A2Q3E8_MEDTR)
Solyc02g086250.3	0.0476484	-1.26	titan9 (AHRD V3.3 *** AT3G20070.4)
Solyc09g015880.3	0.0476653	-1.26	Cytochrome c oxidase subunit 2 (AHRD V3.3 *-* A0A0C5B2A3_HYONI)
Solyc10g008910.1	0.00123942	-1.27	Histone H3 (AHRD V3.3 *** A0A068VC55_COFCA)
Solyc02g064670.1	0.00507934	-1.27	60S ribosomal protein L26-1 (AHRD V3.3 *** RL261_ARATH)
Solyc06g007670.3	0.00595947	-1.27	60S ribosomal protein L5 (AHRD V3.3 *** RL5_CUCSA)
Solyc03g115360.3	0.00826072	-1.27	40S ribosomal protein S19-like (AHRD V3.3 *** Q2VCJ6_SOLTU)
Solyc02g094490.3	0.0084449	-1.27	ATPase E1-E2 type family protein / haloacid dehalogenase-like hydrolase family protein (AHRD V3.3 --* AT1G68710.3)
Solyc07g063580.3	0.00852711	-1.27	Vacuolar sorting protein 9 (VPS9) domain-containing protein (AHRD V3.3 --* AT3G19770.2)
Solyc07g047710.3	0.00863163	-1.27	Glucan endo-1,3-beta-glucosidase-like protein (AHRD V3.3 *** G7JMV2_MEDTR)
Solyc05g055185.1	0.00892339	-1.27	photosystem I reaction center subunit N (AHRD V3.3 *-* AT1G49975.1)
Solyc06g082140.3	0.00943142	-1.27	autoinhibited Ca2+-ATPase 1 (AHRD V3.3 --* AT1G27770.4)
Solyc07g053950.1	0.0203146	-1.27	DNA-directed RNA polymerase subunit alpha (AHRD V3.3 --* A0A0K1ZCQ4_9ASTE)
Solyc05g010040.2	0.0355411	-1.27	homeodomain GLABROUS 2 (AHRD V3.3 --* AT1G05230.9)
Solyc09g065955.1	0.0367252	-1.27	alpha/beta-Hydrolases superfamily protein (AHRD V3.3 --* AT3G51000.1)
Solyc11g066690.2	0.0380491	-1.27	RecQ-mediated instability 2 (AHRD V3.3 *** A0A0B0NH03_GOSAR)
Solyc07g054400.2	0.0395172	-1.27	Centromere protein S (AHRD V3.3 *-* W9S2H7_9ROSA)
Solyc08g082200.3	0.0429113	-1.27	DNA primase (AHRD V3.3 *** K4CPL6_SOLLC)
Solyc05g032770.3	0.0499531	-1.27	PHD finger alfin-like protein (AHRD V3.3 *** A0A072V846_MEDTR)
Solyc01g099830.3	0.000798544	-1.28	60S ribosomal protein L22-2 (AHRD V3.3 *** W9QTY3_9ROSA)
Solyc10g051390.2	0.00153419	-1.28	RNA-binding glycine-rich protein (AHRD V3.3 *** D6PZY6_TOBAC)
Solyc05g052710.3	0.00187651	-1.28	30S ribosomal protein S31 (AHRD V3.3 *** A0A0K9P6K0_ZOSMR),Pfam:PF17067
Solyc04g008210.2	0.00351559	-1.28	ETAG-A3
Solyc06g060400.3	0.00531945	-1.28	Ribosomal protein L15 (AHRD V3.3 *** K4C6M0_SOLLC)
Solyc03g083720.1	0.00810764	-1.28	LOW QUALITY:Plant invertase/pectin methylesterase inhibitor (AHRD V3.3 *** I3T947_MEDTR)
Solyc08g015940.3	0.0086968	-1.28	Epidermal patterning factor-like protein, putative (AHRD V3.3 *** G7JGZ2_MEDTR),Pfam:PF17181
Solyc02g080550.1	0.0230391	-1.28	SH3 domain-binding protein 1, putative (AHRD V3.3 *** A0A061F5K7_THECC)
Solyc04g073960.3	0.0237363	-1.28	Major facilitator superfamily transporter (AHRD V3.3 *** A0A0K0KFR2_CARHR)
Solyc05g014120.1	0.0238173	-1.28	LOW QUALITY:S-adenosyl-L-methionine-dependent methyltransferases superfamily protein (AHRD V3.3 *** AT1G24480.1)
Solyc02g063380.1	0.0253954	-1.28	LOW QUALITY:Fad-dependent oxidoreductase family protein (AHRD V3.3 --* A0A061RE27_9CHLO)
Solyc10g085350.2	0.0320573	-1.28	Macrophage migration inhibitory factor (AHRD V3.3 *** A0A103YL90_CYNCS)
Solyc06g005840.3	0.0409185	-1.28	Mitochondrial import inner membrane translocase subunit Tim10-like protein (AHRD V3.3 *** A0A0B0MQW2_GOSAR)
Solyc11g007740.2	0.0418127	-1.28	Ribosome recycling factor (AHRD V3.3 *** AT3G01800.1)
Solyc02g079360.2	0.00123679	-1.29	Octicosapeptide/Phox/Bem1p family protein (AHRD V3.3 *** AT4G05150.1)
Solyc05g007250.3	0.00467151	-1.29	40S ribosomal protein S9, putative (AHRD V3.3 *** Q60CZ2_SOLDE)
Solyc01g109090.2	0.00602212	-1.29	LOW QUALITY:mRNA, clone: RTFL01-34-C05 (AHRD V3.3 -** E4MXL5_EUTHA)
Solyc05g018395.1	0.00682045	-1.29	Proteasome subunit alpha type (AHRD V3.3 --* A0A0V0HRW3_SOLCH)
Solyc01g057460.3	0.0110347	-1.29	mediator of RNA polymerase II transcription subunit 15a-like protein (AHRD V3.3 *-* AT1G15780.2)
Solyc03g097930.3	0.0152804	-1.29	transcription regulator (AHRD V3.3 --* AT1G02080.3)
Solyc04g079315.1	0.015489	-1.29	RNA binding protein (AHRD V3.3 *** E3NYS6_9FABA)
Solyc08g005590.3	0.0221224	-1.29	SWIb domain-containing protein (AHRD V3.3 *** Q6V9I4_SOLCH)
Solyc11g067255.1	0.0222852	-1.29	F-box and associated interaction domains-containing protein (AHRD V3.3 --* AT5G42430.1)
Solyc01g094070.3	0.0302558	-1.29	Dihydroflavonol-4-reductase-like (AHRD V3.3 *** A0A0N6XTN7_LYCRU)
Solyc08g068670.3	0.0317439	-1.29	Aromatic amino acid decarboxylase 1B (AHRD V3.3 *** Q1KSC5_SOLLC)
Solyc05g046140.3	0.0486164	-1.29	Major latex-like protein (AHRD V3.3 *** Q9AXU0_PRUPE)
Solyc10g081085.1	0.000901798	-1.3	50S ribosomal protein L18, chloroplast, putative (AHRD V3.3 -** B9S9B8_RICCO)
Solyc09g008160.3	0.000952815	-1.3	Cysteine proteinases superfamily protein, putative isoform 5 (AHRD V3.3 --* A0A061FZR3_THECC)
Solyc08g076520.3	0.00318809	-1.3	Transmembrane protein, putative (AHRD V3.3 *** G7KCF0_MEDTR)
Solyc01g099900.3	0.00347947	-1.3	60S ribosomal protein L18, putative (AHRD V3.3 *** B9RFD6_RICCO)
Solyc11g068420.2	0.00593618	-1.3	Ribosomal protein (AHRD V3.3 *** M1CHW0_SOLTU)
Solyc08g076460.3	0.00596404	-1.3	Dolichyl-diphosphooligosaccharide--protein glycosyltransferase subunit DAD1 (AHRD V3.3 *** DAD1_SOLLC)
Solyc05g054070.3	0.0085681	-1.3	60S ribosomal protein L6 (AHRD V3.3 *** RL6_MESCR)
Solyc06g073790.3	0.0087571	-1.3	40s ribosomal protein S11 (AHRD V3.3 *** K7XKQ3_SOLTU)
Solyc01g086800.3	0.0200601	-1.3	Histone H3 (AHRD V3.3 *** H3_VOLCA)
Solyc10g047900.2	0.0237045	-1.3	S-acyltransferase (AHRD V3.3 --* W9SEE1_9ROSA)
Solyc12g006440.1	0.0305922	-1.3	LOW QUALITY:3-isopropylmalate dehydratase large subunit (AHRD V3.3 *** A0A0B0MEL1_GOSAR)
Solyc09g090900.3	0.0414364	-1.3	Aconitate hydratase (AHRD V3.3 *** A0A059LL79_9CHLO)
Solyc04g082120.3	0.0432115	-1.3	Prolyl oligopeptidase family protein (AHRD V3.3 *** AT1G76140.1)
Solyc08g078030.3	0.0471695	-1.3	Transferase, putative (AHRD V3.3 *** B9T0L5_RICCO)
Solyc11g011680.1	0.0486561	-1.3	SAUR-like auxin-responsive protein family (AHRD V3.3 *** AT5G18030.1)
Solyc07g009380.3	2.09832e-14	-1.31	xyloglucan endotransglucosylase-hydrolase 2
Solyc01g080020.2	0.000789721	-1.31	Eukaryotic aspartyl protease family protein, putative (AHRD V3.3 *** A0A061ELJ0_THECC)
Solyc01g109700.3	0.00405387	-1.31	bHLH transcription factor 010
Solyc10g006580.3	0.00593542	-1.31	ribosomal protein L2
Solyc04g077230.1	0.00659214	-1.31	Indole-3-acetaldehyde oxidase (AHRD V3.3 --* ALDO1_MAIZE)
Solyc05g007830.3	0.00819017	-1.31	expansin12
Solyc03g116020.3	0.0084323	-1.31	DNA-directed RNA polymerase subunit (AHRD V3.3 *-* A0A0K9PPT9_ZOSMR)
Solyc08g075850.3	0.00852048	-1.31	50S ribosomal protein L24 (AHRD V3.3 *** W9QWA0_9ROSA)
Solyc01g028810.3	0.00870885	-1.31	Chaperonin-60 beta subunit (AHRD V3.3 *** P93570_SOLTU)
Solyc11g065670.1	0.00876868	-1.31	60S ribosomal protein L12 (AHRD V3.3 *** Q6RJY1_CAPAN)
Solyc09g009650.3	0.00957735	-1.31	Pentatricopeptide repeat (PPR) superfamily protein (AHRD V3.3 --* AT3G18110.1)
Solyc03g019960.3	0.0203255	-1.31	CDT1-like protein a, chloroplastic (AHRD V3.3 *** A0A0B2NWY1_GLYSO)
Solyc01g097570.2	0.023326	-1.31	LOW QUALITY:kinase-like protein (AHRD V3.3 --* AT1G66940.4)
Solyc04g008455.1	0.0239094	-1.31	Potassium transporter (AHRD V3.3 *** K4BP01_SOLLC)
Solyc05g051710.3	0.0240246	-1.31	RPM1-interacting protein 4 (RIN4) family protein (AHRD V3.3 *** G7LBA7_MEDTR)
Solyc06g072690.2	0.0242474	-1.31	Mitotic-spindle organizing 1B-like protein (AHRD V3.3 *** A0A072VE60_MEDTR)
Solyc07g053670.3	0.0242583	-1.31	nuclear fusion defective 6 (AHRD V3.3 *** AT2G20585.7)
Solyc04g054780.3	0.0289744	-1.31	DNA-directed RNA polymerase subunit beta'' (AHRD V3.3 --* RPOC2_SILLA)
Solyc06g066080.1	0.0322879	-1.31	Pentatricopeptide repeat-containing protein (AHRD V3.3 *** A0A103XZP2_CYNCS)
Solyc01g110940.3	0.0375798	-1.31	SAUR-like auxin-responsive protein family (AHRD V3.3 *** AT4G38840.1)
Solyc08g077850.2	0.0444798	-1.31	tRNA/rRNA methyltransferase family protein (AHRD V3.3 *** D7M9H6_ARALL)
Solyc09g090770.2	0.0464359	-1.31	calcium uniporter (DUF607) (AHRD V3.3 --* AT1G57610.4)
Solyc10g079510.2	0.048011	-1.31	RAD3-like DNA-binding helicase protein (AHRD V3.3 *** AT1G20720.2)
Solyc09g072870.3	0.00138446	-1.32	50S ribosomal protein L14 (AHRD V3.3 *** A0A0K9PMD0_ZOSMR)
Solyc02g077480.1	0.00348018	-1.32	Histone H3 (AHRD V3.3 *** A0A068VC55_COFCA)
Solyc04g074750.3	0.00594717	-1.32	RNA-binding (RRM/RBD/RNP motifs) family protein (AHRD V3.3 *** AT4G09040.1)
Solyc02g079870.3	0.00874107	-1.32	multimeric translocon complex in the outer envelope membrane 132 (AHRD V3.3 --* AT2G16640.3)
Solyc09g082660.3	0.00954861	-1.32	Caffeoyl-CoA O-methyltransferase (AHRD V3.3 *** Q2YHM9_PLAMJ)
Solyc02g082020.3	0.0113025	-1.32	BnaC08g09400D protein (AHRD V3.3 *** A0A078FGX7_BRANA)
Solyc01g110920.3	0.0131683	-1.32	Small auxin up-regulated RNA26
Solyc07g008800.3	0.0176744	-1.32	chaperonin
Solyc10g080920.2	0.0219767	-1.32	Myb family transcription factor family protein (AHRD V3.3 *** B9GRM8_POPTR)
Solyc02g088130.1	0.0348366	-1.32	LOW QUALITY:transmembrane protein (AHRD V3.3 *** AT3G29034.1)
Solyc02g069390.2	0.0355898	-1.32	Transcription factor, putative (AHRD V3.3 *** B9RPY7_RICCO)
Solyc06g064810.3	0.000779994	-1.33	Zinc finger and BTB domain-containing protein 11 isoform 1 (AHRD V3.3 *** A0A061FI49_THECC)
Solyc12g096700.2	0.00292928	-1.33	60S ribosomal L9 (AHRD V3.3 *** A0A0B0N9P7_GOSAR)
Solyc07g007760.3	0.00305301	-1.33	defensin-like protein
Solyc02g082000.3	0.00619938	-1.33	Ribosomal protein S19 family protein (AHRD V3.3 *** AT5G09500.1)
Solyc11g067100.2	0.00622603	-1.33	60s acidic ribosomal family protein (AHRD V3.3 *** A9PCM7_POPTR)
Solyc07g063900.3	0.00628898	-1.33	RNA binding protein, putative (AHRD V3.3 *-* B9SY46_RICCO)
Solyc12g096300.2	0.00661921	-1.33	40S ribosomal protein S6 (AHRD V3.3 *** K4DHA3_SOLLC)
Solyc01g099670.3	0.00755229	-1.33	meloidogyne-induced giant cell protein db212
Solyc07g055230.3	0.00919879	-1.33	homeodomain GLABROUS 7 (AHRD V3.3 --* AT5G52170.3)
Solyc11g012520.1	0.0216211	-1.33	LOW QUALITY:Interleukin-1 receptor-associated kinase 4 protein (AHRD V3.3 --* AT5G11360.3)
Solyc12g010750.2	0.0230698	-1.33	Secretory carrier membrane protein (AHRD V3.3 *** B3TLU6_ELAGV)
Solyc01g108650.2	0.0236971	-1.33	LOW QUALITY:embryo defective 1273 (AHRD V3.3 *** AT1G49510.3)
Solyc04g007795.1	0.0240434	-1.33	Major latex-like protein (AHRD V3.3 *** K9MJR1_9ASTR)
Solyc02g080320.3	0.0350069	-1.33	Pseudouridine synthase family protein (AHRD V3.3 *** AT4G21770.1)
Solyc12g070113.1	0.0366584	-1.33	CTP synthase (AHRD V3.3 *-* K4BA89_SOLLC)
Solyc03g013160.3	0.0461465	-1.33	Amino acid transporter, putative (AHRD V3.3 *** B9T0U1_RICCO)
Solyc00g057880.3	0.0471681	-1.33	DELLA protein SLR1 (AHRD V3.3 --* SLR1_ORYSI)
Solyc06g005420.1	0	-1.34	histone H4 (AHRD V3.3 *** AT2G28740.1)
Solyc04g015585.1	0.00205183	-1.34	Ozone-responsive stress related protein (AHRD V3.3 *** I0J1A6_9ORYZ)
Solyc02g066920.3	0.00411365	-1.34	chlororespiratory reduction 7 (AHRD V3.3 *** AT5G39210.1)
Solyc04g025650.3	0.00557386	-1.34	FAD/NAD(P)-binding oxidoreductase family protein (AHRD V3.3 *** A0A072UIU6_MEDTR)
Solyc05g009570.3	0.00595982	-1.34	30S ribosomal protein 3 (AHRD V3.3 *** W9SB90_9ROSA)
Solyc12g010930.2	0.00656049	-1.34	Ribosomal L5P family protein (AHRD V3.3 *** AT5G45775.2)
Solyc01g007140.3	0.0238841	-1.34	ARM repeat superfamily protein (AHRD V3.3 *** AT5G06350.2)
Solyc04g082270.3	0.0241934	-1.34	DUF241 domain protein (DUF241) (AHRD V3.3 *** AT1G76240.1)
Solyc08g068050.3	0.0278089	-1.34	Remodeling and spacing factor 1 (AHRD V3.3 *** A0A151SQU5_CAJCA)
Solyc03g094000.3	0.0476137	-1.34	Light induced like protein (AHRD V3.3 *** C1E3F8_MICCC)
Solyc07g063610.3	1.29896e-14	-1.35	Dynein light chain family protein (AHRD V3.3 *** B9N570_POPTR)
Solyc09g075150.3	0.00115213	-1.35	60S ribosomal protein L22-2 (AHRD V3.3 *** RL222_ARATH)
Solyc10g085480.2	0.00551116	-1.35	60S ribosomal protein L24 (AHRD V3.3 *** RL24_PRUAV)
Solyc06g083180.3	0.00876315	-1.35	40S ribosomal protein S8 (AHRD V3.3 *** K4CAH3_SOLLC)
Solyc05g046270.3	0.0178113	-1.35	Protein Ycf2 (AHRD V3.3 --* YCF2_OENGL)
Solyc06g083270.3	0.0243514	-1.35	ER lumen retaining receptor family-like protein (AHRD V3.3 *** Q38JH5_SOLTU)
Solyc06g084430.3	0.0340249	-1.35	Cupredoxin superfamily protein (AHRD V3.3 --* AT4G39830.1)
Solyc11g012180.2	0.036832	-1.35	Acyl carrier protein (AHRD V3.3 *** K4D623_SOLLC)
Solyc05g051860.3	0.0489768	-1.35	senescence-associated family protein, putative (DUF581) (AHRD V3.3 *** AT1G78020.1)
Solyc09g005720.3	0.00120207	-1.36	60S ribosomal protein L23A (AHRD V3.3 *** A0A0B2RCV3_GLYSO)
Solyc09g009130.3	0.00172567	-1.36	Phytosulfokine 3, putative (AHRD V3.3 *** A0A061ESV9_THECC)
Solyc01g111500.3	0.00750648	-1.36	R2R3MYB transcription factor 7
Solyc08g062620.3	0.00816567	-1.36	Protein phosphatase 2C (AHRD V3.3 *-* I3XLL9_CUCSA)
Solyc01g087570.2	0.00820856	-1.36	BnaA09g36760D protein (AHRD V3.3 *** A0A078EZT5_BRANA)
Solyc06g068400.3	0.00953597	-1.36	60S ribosomal protein L7 (AHRD V3.3 *** B9GMC3_POPTR)
Solyc09g011470.3	0.0201449	-1.36	Plant/T7H20-70 protein (AHRD V3.3 *** G7L5L0_MEDTR)
Solyc07g047790.3	0.0202545	-1.36	Heat shock protein, putative (AHRD V3.3 *** B9T0C8_RICCO)
Solyc10g075150.2	0.0239612	-1.36	Non-specific lipid-transfer protein (AHRD V3.3 *** M1AVB3_SOLTU)
Solyc06g005310.3	0.0347175	-1.36	MYB transcription factor
Solyc06g053150.1	0.0366988	-1.36	P-loop containing nucleoside triphosphate hydrolases superfamily protein (AHRD V3.3 *** AT2G46620.1)
Solyc03g114840.3	0.0379364	-1.36	MADS-box protein 1
Solyc04g076710.3	0.0467118	-1.36	COBRA-like protein 11 precursor (AHRD V3.3 --* AT4G27110.1)
Solyc08g061250.3	0.0494233	-1.36	Kinase family protein (AHRD V3.3 *** U5GAR5_POPTR)
Solyc12g009580.2	7.85322e-06	-1.37	CRABS CLAW 5b
Solyc08g075920.3	0.00494421	-1.37	Protein BREVIS RADIX (AHRD V3.3 *** A0A0B2R5Q1_GLYSO)
Solyc12g098330.2	0.00592566	-1.37	60S ribosomal protein L13a-like protein (AHRD V3.3 *** Q3HRW1_SOLTU)
Solyc09g008295.1	0.0113665	-1.37	Thioredoxin, putative (AHRD V3.3 *** B9S0G2_RICCO)
Solyc05g054610.1	0.0154229	-1.37	histone H4 (AHRD V3.3 *** AT2G28740.1)
Solyc05g053080.2	0.0159871	-1.37	LOW QUALITY:endomembrane-type CA-ATPase 4 (AHRD V3.3 --* AT1G07670.2)
Solyc04g005460.1	0.0229272	-1.37	LOW QUALITY:Pentatricopeptide repeat-containing protein (AHRD V3.3 *** A0A061E9T8_THECC)
Solyc03g120380.3	0.0239176	-1.37	auxin-regulated IAA19
Solyc03g025740.3	0.0240159	-1.37	Actin-depolymerizing factor (AHRD V3.3 *** A0A199VAH1_ANACO)
Solyc00g009080.3	0.0241143	-1.37	Late embryogenesis abundant protein, putative (AHRD V3.3 *** A0A072VQC9_MEDTR)
Solyc03g095180.3	0.02651	-1.37	Superoxide dismutase (AHRD V3.3 *** Q7YK44_SOLLC)
Solyc06g011470.3	0.0355042	-1.37	LOW QUALITY:beta-amylase 5 (AHRD V3.3 --* AT4G15210.4)
Solyc05g046320.1	0.0379706	-1.37	Small auxin up-regulated RNA55
Solyc04g015140.2	0.0446626	-1.37	Low PSII Accumulation 3 (AHRD V3.3 --* AT1G73060.1)
Solyc12g099030.2	0.00124195	-1.38	Ubiquitin, putative (AHRD V3.3 *** B9RN74_RICCO)
Solyc04g077130.1	0.00297193	-1.38	50S ribosomal protein 6 (AHRD V3.3 *** W9SDC9_9ROSA)
Solyc10g080590.2	0.0059256	-1.38	60S ribosomal protein L21-like protein (AHRD V3.3 *** Q3HVK5_SOLTU)
Solyc06g082760.3	0.00638031	-1.38	50S ribosomal protein L17 (AHRD V3.3 *** W9R5S7_9ROSA)
Solyc04g074300.3	0.0069468	-1.38	40S ribosomal protein S2 (AHRD V3.3 *** K7WJZ4_SOLTU)
Solyc11g068430.2	0.00822865	-1.38	Ferredoxin family protein (AHRD V3.3 *** B9HQ08_POPTR)
Solyc01g088610.3	0.0108033	-1.38	10 kDa chaperonin (AHRD V3.3 *** A0A0B2PT56_GLYSO)
Solyc09g074300.1	0.0218952	-1.38	Histone H2A (AHRD V3.3 *** K4CV07_SOLLC)
Solyc01g007180.3	0.0233527	-1.38	Gamma-tubulin complex component (AHRD V3.3 *** K4AST4_SOLLC)
Solyc10g008200.3	0.0333618	-1.38	Tyrosine aminotransferase, putative (AHRD V3.3 *** B9RVV0_RICCO)
Solyc10g080070.2	0.037733	-1.38	Mitochondrial GTPase 1 (AHRD V3.3 *** A0A0B0PKU7_GOSAR)
Solyc09g072700.3	0.0380522	-1.38	Peroxidase (AHRD V3.3 *** K4CUU6_SOLLC)
Solyc01g101110.3	0.0397573	-1.38	Serine/threonine-protein kinase haspin (AHRD V3.3 *** A0A146F677_TOBAC)
Solyc02g070935.1	0.0405116	-1.38	Pectate lyase (AHRD V3.3 *-* A0A199VAW8_ANACO)
Solyc06g007570.3	0.00297452	-1.39	40S ribosomal protein S8 (AHRD V3.3 *** K4C3D8_SOLLC)
Solyc03g096360.3	0.00449501	-1.39	60S ribosomal protein L35a (AHRD V3.3 *** B6VC50_VERFO)
Solyc11g072260.2	0.00941033	-1.39	40S ribosomal protein S13 (AHRD V3.3 *** RS13_SOYBN)
Solyc10g083600.2	0.0108119	-1.39	Brix domain-containing protein (AHRD V3.3 *** H9A0F8_NICBE)
Solyc04g063245.1	0.0239442	-1.39	Cytochrome P450 (AHRD V3.3 *** Q9M7M3_CAPAN)
Solyc11g010440.2	0.0350669	-1.39	GRAM domain protein/ABA-responsive-like protein (AHRD V3.3 *** G7KW78_MEDTR)
Solyc07g045370.3	0.0383782	-1.39	Las1-like family protein (AHRD V3.3 *** B9HNI6_POPTR)
Solyc01g111000.3	0.0410915	-1.39	Auxin responsive SAUR protein (AHRD V3.3 *** A0A118K2C1_CYNCS)
Solyc08g077320.2	0.0433645	-1.39	Pentatricopeptide repeat-containing protein (AHRD V3.3 *** A0A0B2QIA0_GLYSO)
Solyc12g096540.2	0.000905523	-1.4	40S ribosomal protein S10-like (AHRD V3.3 *** Q2XPV4_SOLTU)
Solyc03g111230.3	0.00297041	-1.4	Ribosomal protein (AHRD V3.3 *** Q947H2_PETHY)
Solyc06g073310.3	0.00311728	-1.4	60S ribosomal protein l9 (AHRD V3.3 *** E5GBD5_CUCME)
Solyc09g008800.3	0.00351337	-1.4	60S ribosomal protein L24 (AHRD V3.3 *** RL24_PRUAV)
Solyc04g077860.3	0.00432214	-1.4	Sigma factor sigb regulation protein rsbq, putative (AHRD V3.3 *** B9R708_RICCO)
Solyc06g008260.3	0.00441475	-1.4	60S ribosomal protein L14, putative (AHRD V3.3 *** B9SS61_RICCO)
Solyc06g073300.1	0.00596707	-1.4	60S ribosomal protein L27 (AHRD V3.3 *** A0A0V0HNB9_SOLCH)
Solyc01g086690.2	0.0230587	-1.4	LOW QUALITY:Sister chromatid cohesion 1 protein 3 (AHRD V3.3 *** W9R9I5_9ROSA)
Solyc09g007940.3	0.0238575	-1.4	Adenosine kinase, putative (AHRD V3.3 *** B9T0A9_RICCO)
Solyc04g080310.1	0.0270122	-1.4	DNA repair metallo-beta-lactamase family protein (AHRD V3.3 --* AT3G26680.4)
Solyc12g099810.2	0.0301619	-1.4	Crt (AHRD V3.3 *** A0A0B0NUB3_GOSAR)
Solyc03g111785.1	0.0345518	-1.4	centromere protein X (AHRD V3.3 *** AT1G78790.4)
Solyc04g008600.3	0.0352917	-1.4	Zinc knuckle family protein (AHRD V3.3 *** B9HVL9_POPTR)
Solyc01g110800.3	0.0378082	-1.4	Small auxin up-regulated RNA19
Solyc03g082830.2	0.0412996	-1.4	Pentatricopeptide repeat-containing protein (AHRD V3.3 *** A0A0B2R998_GLYSO)
Solyc08g014190.3	0.0483018	-1.4	Cytochrome P450 (AHRD V3.3 *** Q8H0I6_PETHY)
Solyc06g069860.3	0.00242927	-1.41	60S ribosomal protein L34 (AHRD V3.3 *** RL34_TOBAC)
Solyc05g054580.3	0.00992196	-1.41	60S acidic ribosomal protein P0 (AHRD V3.3 *** K4C2D6_SOLLC)
Solyc01g109550.2	0.0215108	-1.41	Mitochondrial transcription termination factor family protein (AHRD V3.3 *** AT3G18870.1)
Solyc00g068980.2	0.0217428	-1.41	LOW QUALITY:Superoxide dismutase [Cu-Zn] 1 (AHRD V3.3 --* SODC1_ORYSI)
Solyc07g006855.1	0.0219087	-1.41	CASP-like protein (AHRD V3.3 *** M1BM50_SOLTU)
Solyc06g065800.3	0.0236212	-1.41	Mitochondrial glycoprotein family protein (AHRD V3.3 *** AT4G31930.1)
Solyc10g084230.2	0.0236815	-1.41	DUF1685 family protein (AHRD V3.3 *** G7LJH7_MEDTR)
Solyc03g095500.3	0.0239093	-1.41	Thioredoxin h protein (AHRD V3.3 *** X5C425_NICBE)
Solyc10g061970.2	0.0254464	-1.41	60S ribosomal protein L37a (AHRD V3.3 *** RL37A_GOSHI)
Solyc04g006930.3	0.0295293	-1.41	Kinase family protein (AHRD V3.3 *-* B9HIU4_POPTR)
Solyc06g076860.3	0.0303662	-1.41	cell division control 6 (AHRD V3.3 *** AT2G29680.2)
Solyc04g014850.3	0.0311146	-1.41	structural maintenance of chromosomes protein (AHRD V3.3 *** AT4G17240.1)
Solyc04g051880.2	0.0368214	-1.41	LOW QUALITY:Mitochondrial transcription termination factor family protein, putative (AHRD V3.3 --* A0A061DJV1_THECC)
Solyc01g067125.1	0.0369262	-1.41	Cullin 1, putative (AHRD V3.3 *-* A0A061EP85_THECC)
Solyc08g014300.3	0.0374473	-1.41	FAM136A-like protein (DUF842) (AHRD V3.3 *** AT1G05730.1)
Solyc07g008103.1	0.0439211	-1.41	Blue copper protein (AHRD V3.3 *-* A0A151SLU0_CAJCA)
Solyc07g062930.3	0.0446652	-1.41	protein methyltransferase PrmA-like
Solyc12g099200.2	2.9976e-15	-1.42	Invertase inhibitor (AHRD V3.3 *** I1VR17_SOLTU)
Solyc11g066840.2	0.00100259	-1.42	Histone deacetylase-like protein-like (AHRD V3.3 *** Q2XTD2_SOLTU)
Solyc11g072860.2	0.00153334	-1.42	histone H4 (AHRD V3.3 *** AT2G28740.1)
Solyc06g036050.3	0.00282886	-1.42	60S ribosomal protein L36 (AHRD V3.3 *** K4C4X4_SOLLC)
Solyc07g063910.3	0.00851548	-1.42	Ribosomal protein L2 family (AHRD V3.3 *** AT4G36130.1)
Solyc09g075160.3	0.00872625	-1.42	60S ribosomal protein L22-2 (AHRD V3.3 *** RL222_ARATH)
Solyc02g067520.3	0.0129972	-1.42	Unknown protein (AHRD V3.3 )
Solyc04g049410.2	0.0164672	-1.42	Cysteine proteinases superfamily protein (AHRD V3.3 --* AT3G62940.4)
Solyc08g067310.1	0.0177046	-1.42	Non-specific serine/threonine protein kinase (AHRD V3.3 *** K4CLV7_SOLLC)
Solyc10g008680.2	0.0205022	-1.42	Anthocyanin 5-aromatic acyltransferase (AHRD V3.3 *** ANTA_GENTR)
Solyc02g079820.3	0.0367212	-1.42	Pentatricopeptide repeat-containing protein (AHRD V3.3 *** A0A103XF40_CYNCS)
Solyc05g032680.3	0.037026	-1.42	3-hydroxyisobutyryl-CoA hydrolase-like protein (AHRD V3.3 *-* A0A072TX02_MEDTR)
Solyc10g007750.1	0.0428673	-1.42	LOW QUALITY:Plant basic secretory protein family protein, putative (AHRD V3.3 *** A0A061DSQ8_THECC)
Solyc07g043360.1	0.00214738	-1.43	60S ribosomal protein L27 (AHRD V3.3 *** K4CEJ5_SOLLC)
Solyc06g066660.3	0.00381466	-1.43	Ribosomal protein L37 (AHRD V3.3 *** M1BDD8_SOLTU)
Solyc12g087950.1	0.00627687	-1.43	AT hook motif DNA-binding family protein (AHRD V3.3 *** G7J554_MEDTR)
Solyc07g042250.3	0.00652157	-1.43	chaperonin 21 precursor
Solyc07g049230.1	0.00892374	-1.43	RmlC-like cupins superfamily protein (AHRD V3.3 *** AT2G32650.2)
Solyc06g069890.3	0.00896996	-1.43	Nucleosome assembly protein family (AHRD V3.3 *** A9RDJ7_PHYPA)
Solyc03g083020.3	0.0123613	-1.43	Polarized growth chromatin-associated controller 1 (AHRD V3.3 *** A0A1D1YSE5_9ARAE)
Solyc04g008820.3	0.0156128	-1.43	High mobility group protein (AHRD V3.3 *-* O49948_SOLTU)
Solyc02g072270.3	0.0222715	-1.43	RING/FYVE/PHD zinc finger superfamily protein, putative (AHRD V3.3 *** A0A061GDI8_THECC)
Solyc05g041920.3	0.0230141	-1.43	Ribonuclease 3 family protein (AHRD V3.3 *** B9GTV4_POPTR)
Solyc04g015590.3	0.0238026	-1.43	Dihydroflavonol-4-reductase-like protein (AHRD V3.3 *** G7IPP8_MEDTR)
Solyc00g217960.1	0.0244569	-1.43	LOW QUALITY:RING/U-box superfamily protein (AHRD V3.3 *-* AT1G49200.1)
Solyc04g057830.1	0.0499174	-1.43	LOW QUALITY:DUF4228 domain protein (AHRD V3.3 *** G7K362_MEDTR)
Solyc01g089970.3	0.00272838	-1.44	Nucleoside diphosphate kinase (AHRD V3.3 *** NDK_CAPAN)
Solyc05g005690.1	0.00396283	-1.44	Ribosomal protein S9, putative (AHRD V3.3 *** B9RYF4_RICCO)
Solyc10g081370.2	0.00523911	-1.44	small nuclear ribonucleoprotein F (AHRD V3.3 *** AT4G30220.1)
Solyc08g007140.3	0.00847004	-1.44	60S ribosomal protein L37a (AHRD V3.3 *** RL37A_GOSHI)
Solyc06g072240.1	0.021077	-1.44	histone H4 (AHRD V3.3 *** AT2G28740.1)
Solyc01g066290.2	0.0221607	-1.44	LOW QUALITY:Xaa-Pro aminopeptidase 1 (AHRD V3.3 --* A0A199W6F4_ANACO)
Solyc04g074780.3	0.02388	-1.44	Phage capsid scaffolding protein (GPO) serine peptidase (AHRD V3.3 *** G7KAI6_MEDTR)
Solyc12g010980.2	0.0239826	-1.44	HXXXD-type acyl-transferase family protein (AHRD V3.3 *** AT3G26040.1)
Solyc06g053490.3	0.0267516	-1.44	FAM136A-like protein (DUF842) (AHRD V3.3 *** AT2G31725.1)
Solyc06g082780.3	0.0273911	-1.44	Calcium uniporter, mitochondrial (AHRD V3.3 *** A0A0B0N729_GOSAR)
Solyc11g011860.1	0.0306952	-1.44	Pentatricopeptide repeat-containing protein family (AHRD V3.3 *** A0A151RGT3_CAJCA)
Solyc02g080110.3	0.0358802	-1.44	Transmembrane protein, putative (AHRD V3.3 *** A0A072VQK9_MEDTR)
Solyc01g110913.1	0.0379997	-1.44	Auxin responsive SAUR protein (AHRD V3.3 *** A0A118K004_CYNCS)
Solyc01g081340.3	0.04015	-1.44	S-adenosyl-L-methionine:salicylic acid carboxyl methyltransferase 1 (AHRD V3.3 *** B5TVE1_TOBAC)
Solyc03g062700.3	0.0463991	-1.44	ARM repeat superfamily protein (AHRD V3.3 *** A0A061F2F3_THECC)
Solyc08g075700.3	0.00591034	-1.45	60S ribosomal protein L13 (AHRD V3.3 *** K4CMT7_SOLLC)
Solyc01g056940.3	0.00597091	-1.45	Ubiquitin
Solyc08g079690.3	0.00821672	-1.45	Homeobox-leucine zipper protein HOX9, putative (AHRD V3.3 *** A0A061DUZ5_THECC)
Solyc07g005370.3	0.00883526	-1.45	Pathogenesis-related (PR)-10-related norcoclaurine synthase-like protein (AHRD V3.3 *** C3SBS5_ESCCA)
Solyc10g086510.2	0.00967165	-1.45	Mitochondrial import inner membrane translocase subunit Tim9 (AHRD V3.3 *** TIM9_ORYSJ)
Solyc01g065700.3	0.014012	-1.45	Protein phosphatase 2C family protein (AHRD V3.3 *** AT5G27930.2)
Solyc02g062910.2	0.0160103	-1.45	Pentatricopeptide repeat-containing protein (AHRD V3.3 *** D7MBF2_ARALL)
Solyc04g053020.2	0.0188655	-1.45	SAUR-like auxin-responsive protein family, putative (AHRD V3.3 *** A0A061E5G9_THECC)
Solyc06g050500.2	0.0219658	-1.45	Abscisic acid receptor (AHRD V3.3 *** G7KT83_MEDTR)
Solyc04g078140.3	0.031362	-1.45	Cytochrome B5 (AHRD V3.3 *** Q9ZSP7_PETHY)
Solyc11g042880.2	0.0402273	-1.45	Late embryogenesis abundant protein (AHRD V3.3 *** A0A072UNH6_MEDTR)
Solyc05g050570.3	0.0434974	-1.45	Molybdopterin biosynthesis CNX3-like protein (AHRD V3.3 *** A0A0B0MZX3_GOSAR)
Solyc01g066840.3	0.00126165	-1.46	40S ribosomal protein S21 (AHRD V3.3 *** A0A0V0GU27_SOLCH)
Solyc06g083340.3	0.00184667	-1.46	Wound-induced basic protein (AHRD V3.3 *** PR4_PHAVU)
Solyc08g068180.3	0.00210114	-1.46	Ribosomal protein L37 (AHRD V3.3 *** K4CM42_SOLLC)
Solyc10g006530.3	0.00243603	-1.46	Photosynthetic NDH subcomplex L 3 (AHRD V3.3 *** A0A0F7CYJ0_9ROSI)
Solyc01g068530.3	0.00342607	-1.46	Ribosomal protein S16 (AHRD V3.3 *** A9P8S1_POPTR)
Solyc01g096580.3	0.00466409	-1.46	ribosomal protein S10p/S20e family protein
Solyc06g071530.3	0.00596453	-1.46	60S ribosomal protein L44 (AHRD V3.3 *** RL44_GOSHI)
Solyc04g016380.3	0.00867204	-1.46	Ribosome biogenesis protein brix, putative (AHRD V3.3 *** B9SUS1_RICCO)
Solyc06g083820.3	0.00874047	-1.46	60S ribosomal protein L14, putative (AHRD V3.3 *** B9SS61_RICCO)
Solyc11g042440.1	0.0163796	-1.46	LOW QUALITY:NF-X-like 1 (AHRD V3.3 --* AT1G10170.4)
Solyc02g077730.3	0.0177711	-1.46	nuclear fusion defective 6 (AHRD V3.3 *** AT2G20585.5)
Solyc09g098440.3	0.0204586	-1.46	ROP-interactive CRIB motif protein (AHRD V3.3 *** G7KTT6_MEDTR)
Solyc06g068710.3	0.0238909	-1.46	40S ribosomal protein S27 (AHRD V3.3 *** K4C845_SOLLC)
Solyc01g100080.3	0.027586	-1.46	Single-stranded DNA-binding protein (AHRD V3.3 *** G7I9F0_MEDTR)
Solyc03g093410.3	0.0308279	-1.46	Sugar transporter protein 16
Solyc09g010095.1	0.0332449	-1.46	plant/protein (AHRD V3.3 --* AT2G41150.1)
Solyc11g045520.2	0.0412081	-1.46	1-AMINOCYCLOPROPANE-1-CARBOXYLATE OXIDASE-like protein
Solyc02g092530.3	0.00241933	-1.47	Acetamidase/Formamidase family protein (AHRD V3.3 *** AT4G37560.1)
Solyc12g009110.2	0.00349765	-1.47	O-methyltransferase, putative (AHRD V3.3 *** B9SUX6_RICCO)
Solyc10g086150.2	0.00362872	-1.47	RNA-binding (RRM/RBD/RNP motifs) family protein (AHRD V3.3 *** AT2G37220.1)
Solyc02g090180.3	0.0312364	-1.47	Prolyl oligopeptidase family protein (AHRD V3.3 *** AT5G66960.1)
Solyc02g092200.3	0.0387573	-1.47	Histone-lysine N-methyltransferase NSD3, putative (AHRD V3.3 *** A0A061DH30_THECC)
Solyc08g036615.1	0.0419392	-1.47	ABC-2 type transporter family protein (AHRD V3.3 --* AT4G25750.1)
Solyc03g112850.3	0.0024515	-1.48	60S ribosomal protein L44 (AHRD V3.3 *** RL44_GOSHI)
Solyc05g055230.2	0.00366128	-1.48	40S ribosomal protein S17 (AHRD V3.3 *** RS17_SOLLC)
Solyc11g007860.1	0.00593599	-1.48	LOW QUALITY:Cyclin-dependent protein kinase inhibitor Siamese (AHRD V3.3 *** M4M6N3_GOSAR)
Solyc06g083780.3	0.0077274	-1.48	50S ribosomal protein L14 (AHRD V3.3 *** A0A0K9PMD0_ZOSMR)
Solyc10g048030.2	0.00876362	-1.48	Major latex-like protein (AHRD V3.3 *** B5THI3_PANGI)
Solyc03g053023.1	0.0182004	-1.48	DNA-directed RNA polymerase subunit beta (AHRD V3.3 *** AT2G41950.1)
Solyc11g007190.1	0.0222121	-1.48	ARM repeat superfamily protein (AHRD V3.3 --* AT3G03970.6)
Solyc03g007850.1	0.0230411	-1.48	Crooked neck protein, putative (AHRD V3.3 *** B9RCP3_RICCO)
Solyc10g084830.2	0.0234087	-1.48	Amino acid transporter family protein (AHRD V3.3 *** B9IFW4_POPTR)
Solyc03g045123.1	0.0242832	-1.48	D111/G-patch domain-containing protein (AHRD V3.3 --* AT5G08535.1)
Solyc04g056530.2	0.0310681	-1.48	L18 ribosomal protein Heart Stopper (AHRD V3.3 *** A0A0I9RJ77_TOBAC)
Solyc05g054435.1	0.0356568	-1.48	DNA replication complex GINS protein PSF2 (AHRD V3.3 *-* M1C604_SOLTU)
Solyc01g068250.2	0.037739	-1.48	LOW QUALITY:Transducin/WD40 repeat-like superfamily protein (AHRD V3.3 *** A0A061FJT3_THECC)
Solyc00g126000.1	0.0402897	-1.48	NADH-ubiquinone oxidoreductase chain 2 (AHRD V3.3 *-* NU2M_BETVU)
Solyc08g077330.3	0.0407255	-1.48	Expansin-like protein (AHRD V3.3 *** W9SU42_9ROSA)
Solyc05g008620.3	0.0410952	-1.48	DNA replication complex GINS protein psf3 (AHRD V3.3 *** A0A061FM87_THECC)
Solyc05g055550.3	1.02067e-07	-1.49	TSA: Wollemia nobilis Ref_Wollemi_Transcript_5463_1093 transcribed RNA sequence (AHRD V3.3 *** A0A0C9RPH1_9SPER)
Solyc08g076960.1	0.00339391	-1.49	Abscisic acid receptor PYL1 (AHRD V3.3 *** M1BH64_SOLTU)
Solyc10g083165.1	0.00584923	-1.49	40S ribosomal protein S17 (AHRD V3.3 *** RS17_SOLLC)
Solyc01g108390.3	0.00787346	-1.49	Proteinase inhibitor (AHRD V3.3 *** A0A0R4WFE3_TOBAC)
Solyc05g007560.3	0.00875829	-1.49	60S ribosomal protein L34 (AHRD V3.3 *** RL34_TOBAC)
Solyc07g006590.1	0.0131629	-1.49	LOW QUALITY:kinase superfamily with octicosapeptide/Phox/Bem1p domain-containing protein (AHRD V3.3 --* AT3G24715.3)
Solyc08g082160.3	0.0180272	-1.49	Subtilisin-like protease (AHRD V3.3 *-* W9RY25_9ROSA)
Solyc07g062280.3	0.0222757	-1.49	Gamma-glutamyl hydrolase (AHRD V3.3 *** X5HY53_IPONI)
Solyc09g009900.3	0.0238933	-1.49	Nucleic acid-binding, OB-fold (AHRD V3.3 *** A0A103YMS1_CYNCS)
Solyc09g072580.3	0.0380589	-1.49	Actin-depolymerizing factor (AHRD V3.3 *** A0A151TUH5_CAJCA)
Solyc05g013010.3	0.0463411	-1.49	Sulfotransferase (AHRD V3.3 *** K4BY22_SOLLC)
Solyc03g119360.3	0.00319072	-1.5	40S ribosomal protein S7-like protein (AHRD V3.3 *** Q3HRX6_SOLTU)
Solyc01g097760.3	0.00525883	-1.5	60S ribosomal protein L7A-like protein (AHRD V3.3 *** Q2XPW4_SOLTU)
Solyc06g007520.3	0.00596365	-1.5	60S ribosomal protein L10 (AHRD V3.3 *** RL10_SOLME)
Solyc12g005070.2	0.00823311	-1.5	CASP-like protein (AHRD V3.3 *** K4DB45_SOLLC)
Solyc06g051260.3	0.00993638	-1.5	bHLH transcription factor 043
Solyc07g055270.1	0.0237942	-1.5	LOW QUALITY:DUF1685 family protein (AHRD V3.3 *** G7IM74_MEDTR)
Solyc09g019980.3	0.0264411	-1.5	Cytochrome b561/ferric reductase transmembrane with DOMON related domain, putative (AHRD V3.3 *** A0A061DLM1_THECC)
Solyc02g063280.3	0.0137509	-1.51	stress response protein (AHRD V3.3 *-* AT1G60640.3)
Solyc12g036450.2	0.0308282	-1.51	40S ribosomal protein S7 (AHRD V3.3 *-* A0A0B2Q5H6_GLYSO)
Solyc01g088500.3	0.0484367	-1.51	Wall-associated receptor kinase-like 20 (AHRD V3.3 *** A0A0B0PGP7_GOSAR)
Solyc06g074600.1	0.0499909	-1.51	LOW QUALITY:DNA-directed RNA polymerase subunit beta'' (AHRD V3.3 *-* RPOC2_SOLLC)
Solyc10g086020.2	0.00346558	-1.52	interactor of constitutive active ROPs 3
Solyc06g071870.3	0.00374994	-1.52	Ribosomal protein (AHRD V3.3 *** Q947H2_PETHY)
Solyc06g073370.3	0.00462023	-1.52	Ribosomal protein S13 (AHRD V3.3 *** A0A103XPA4_CYNCS)
Solyc10g078580.1	0.00573821	-1.52	Arabinogalactan peptide 14 (AHRD V3.3 *** AGP14_ARATH)
Solyc03g121330.3	0.00592561	-1.52	60S ribosomal protein L28, putative (AHRD V3.3 *** B9RKC5_RICCO)
Solyc10g084310.2	0.00609111	-1.52	Ribosomal protein S12 (AHRD V3.3 *** A0A059LPB2_9CHLO)
Solyc10g084840.2	0.00832335	-1.52	Pathogenesis-related thaumatin family protein (AHRD V3.3 *** A0A072TZL3_MEDTR)
Solyc00g080750.3	0.0162806	-1.52	Plastid movement impaired protein (AHRD V3.3 *** A0A072VEV4_MEDTR)
Solyc03g007170.3	0.0197137	-1.52	Peptidyl-prolyl cis-trans isomerase FKBP53 (AHRD V3.3 *** W9QW00_9ROSA)
Solyc02g094250.3	0.0232596	-1.52	Chlorophyll a-b binding protein, chloroplastic (AHRD V3.3 --* A8I000_CHLRE)
Solyc03g111210.3	0.0370149	-1.52	Pentatricopeptide repeat-containing family protein (AHRD V3.3 *** B9GNH7_POPTR)
Solyc02g085320.1	0.0373157	-1.52	Maturase K (AHRD V3.3 --* MATK_PAESU)
Solyc03g120800.3	0.0486167	-1.52	Peroxidase (AHRD V3.3 *-* K4BMM9_SOLLC)
Solyc06g073430.3	0.00252941	-1.53	Ribosomal protein S3 (AHRD V3.3 --* A0A0K1ZDA3_9SOLA)
Solyc10g052660.3	0.00549596	-1.53	ribosomal protein S25
Solyc05g016060.3	0.00608916	-1.53	cysteine-rich/transmembrane domain A-like protein (AHRD V3.3 *** AT2G32190.1)
Solyc03g120780.3	0.0114855	-1.53	Ribosomal protein L37 (AHRD V3.3 *** K4BMM7_SOLLC)
Solyc01g107450.3	0.0138263	-1.53	caspase-6 protein (AHRD V3.3 *** AT2G15000.7)
Solyc04g008450.3	0.023032	-1.53	Potassium transporter (AHRD V3.3 *-* K4BP01_SOLLC)
Solyc04g050950.3	0.0303789	-1.53	Sn-1 protein (AHRD V3.3 *** Q42393_CAPAN)
Solyc04g053000.1	0.0312579	-1.53	SAUR-like auxin-responsive protein family (AHRD V3.3 *** AT2G21210.2)
Solyc04g024840.3	0.0367877	-1.53	GDSL lipase-like protein (AHRD V3.3 *** H6U1I8_TANCI)
Solyc03g095780.2	0.0418592	-1.53	Abscisic acid receptor (AHRD V3.3 *** G7JKP6_MEDTR)
Solyc11g019910.1	2.74843e-05	-1.54	LOW QUALITY:Plant invertase/pectin methylesterase inhibitor (AHRD V3.3 *** I3T947_MEDTR)
Solyc03g112360.1	0.00159002	-1.54	60S ribosomal protein L27A (AHRD V3.3 *** B6VC54_VERFO)
Solyc04g077990.3	0.0200517	-1.54	LOB domain-containing protein, putative (AHRD V3.3 *** B9SND0_RICCO)
Solyc06g062390.3	0.041244	-1.54	Acid phosphatase-like protein 1 (AHRD V3.3 *** V9MHL3_9ROSA)
Solyc12g011090.2	0.0417081	-1.54	cellulose synthase, putative (DUF1644) (AHRD V3.3 --* AT3G24740.6)
Solyc07g007450.3	0.0482137	-1.54	Iron-sulfur cluster assembly protein (AHRD V3.3 *** K4CBL5_SOLLC)
Solyc06g008170.3	0.00524632	-1.55	50S ribosomal protein L14 (AHRD V3.3 *** A0A0K9PMD0_ZOSMR)
Solyc11g066950.2	0.00684097	-1.55	Stress responsive A/B Barrel Domain-containing protein (AHRD V3.3 *** AT5G22580.1)
Solyc04g079310.3	0.00940376	-1.55	RNA-binding protein (AHRD V3.3 *** A0A0K9NR72_ZOSMR)
Solyc06g076660.3	0.0100231	-1.55	proliferating cell nuclear antigen
Solyc10g074560.2	0.0228812	-1.55	Nucleolar complex 4 (AHRD V3.3 *** A0A0B0NPG2_GOSAR)
Solyc12g009270.1	0.0242188	-1.55	Plant invertase/pectin methylesterase inhibitor superfamily protein (AHRD V3.3 *** A0A061GSW0_THECC)
Solyc04g074830.1	0.0297578	-1.55	LOW QUALITY:ENTH/ANTH/VHS superfamily protein, putative (AHRD V3.3 *** A0A061FE62_THECC)
Solyc07g055170.1	0.0373347	-1.55	DNA repair Rad51-like protein (AHRD V3.3 *** A0A072V7S1_MEDTR)
Solyc06g075180.1	0.00115833	-1.56	60S ribosomal protein L12 (AHRD V3.3 *** K7WTX4_SOLTU)
Solyc11g012640.1	0.00351626	-1.56	LOW QUALITY:Peroxiredoxin Q, chloroplastic (AHRD V3.3 *-* M8CFS7_AEGTA)
Solyc05g044620.2	0.00501217	-1.56	CDP-diacylglycerol-glycerol-3-phosphate 3-phosphatidyltransferase (AHRD V3.3 -** AT1G19020.1)
Solyc01g096590.3	0.00673411	-1.56	ribosomal protein S10p/S20e family protein
Solyc06g060760.3	0.00842248	-1.56	tonoplast intrinsic protein 2.3
Solyc06g054590.3	0.00847072	-1.56	transmembrane protein (AHRD V3.3 *** AT5G09270.2)
Solyc02g093670.3	0.0209096	-1.56	RPM1-interacting protein 4 family protein, putative (AHRD V3.3 *** A0A061FYM4_THECC)
Solyc03g094070.3	0.0231456	-1.56	Mediator of RNA polymerase II transcription subunit 31 (AHRD V3.3 *-* A0A0S2LKK3_REHGL)
Solyc12g010430.1	0	-1.57	LOW QUALITY:NHL domain protein (AHRD V3.3 --* AT3G01430.1)
Solyc07g053540.1	6.99441e-15	-1.57	Fasciclin-like arabinogalactan protein (AHRD V3.3 *** A0A072VC68_MEDTR)
Solyc06g069400.3	0.00307328	-1.57	Isoaspartyl peptidase/L-asparaginase (AHRD V3.3 *** ASPG_LUPLU)
Solyc01g096290.3	0.00399185	-1.57	ubiquitin-ribosomal fusion protein
Solyc06g008220.3	0.00860941	-1.57	DAG protein (AHRD V3.3 *** A0A0K9Q0F0_ZOSMR)
Solyc07g062100.3	0.0235707	-1.57	PHD-zinc-finger-like domain protein (AHRD V3.3 *** G7ZV42_MEDTR)
Solyc02g086600.3	0.0359134	-1.57	polyribonucleotide nucleotidyltransferase (AHRD V3.3 *** AT5G14580.1)
Solyc04g081020.3	0.0471488	-1.57	Zinc finger, B-box (AHRD V3.3 *** A0A103XBE6_CYNCS)
Solyc01g107190.3	0.00224378	-1.58	LOB domain-containing protein, putative (AHRD V3.3 *** B9SGY6_RICCO)
Solyc09g065330.3	0.00596372	-1.58	40S ribosomal protein S24 (AHRD V3.3 *** K4CAS8_SOLLC)
Solyc01g095250.1	0.0134721	-1.58	Acidic endochitinase (AHRD V3.3 *** W9R015_9ROSA)
Solyc06g072600.3	0.0201515	-1.58	Mitochondrial import inner membrane translocase subunit (AHRD V3.3 *** F2VPS7_SOLNI)
Solyc03g117380.3	0.0240691	-1.58	Protein TOPLESS (AHRD V3.3 *-* TPL_ARATH)
Solyc08g074480.1	0.00467563	-1.59	14 kDa proline-rich protein DC2.15 (AHRD V3.3 *** A0A0B2P545_GLYSO)
Solyc07g009330.3	0.00718771	-1.59	Auxin induced-like protein (AHRD V3.3 *** E0Z5V6_PICSI)
Solyc06g071880.3	0.00875808	-1.59	60S ribosomal protein L17 (AHRD V3.3 *** A0A0D3QSL6_TOBAC)
Solyc06g066530.1	0.0134417	-1.59	LOW QUALITY:DUF1677 family protein (AHRD V3.3 *** G7LFY6_MEDTR)
Solyc06g051300.3	0.0209298	-1.59	Chromosome transmission fidelity protein 8 (AHRD V3.3 *** A0A1D1XTK7_9ARAE)
Solyc03g115365.1	0.0216524	-1.59	Protein TIC 214 (AHRD V3.3 --* TI214_NICTO)
Solyc03g006990.1	0.0230463	-1.59	Pentatricopeptide repeat-containing protein (AHRD V3.3 *** A0A0B2QQF9_GLYSO)
Solyc10g009130.3	0.0231896	-1.59	nuclear fusion defective 6 (AHRD V3.3 *-* AT2G20585.5)
Solyc11g013330.2	0.0234624	-1.59	BPS1-like protein (AHRD V3.3 *** AT1G22030.1)
Solyc02g067700.1	0.0237651	-1.59	RING/U-box superfamily protein, putative (AHRD V3.3 *** A0A061FV20_THECC)
Solyc01g110590.3	0.0362588	-1.59	Small auxin up-regulated RNA6
Solyc04g080435.1	0.037626	-1.59	MYB family transcription factor (AHRD V3.3 *** A0A072VEW4_MEDTR)
Solyc07g005050.3	0.00305346	-1.6	60S ribosomal protein L39 (AHRD V3.3 *** RL39_MAIZE)
Solyc11g012110.2	0.0031541	-1.6	60S ribosomal protein L6 (AHRD V3.3 *** RL6_MESCR)
Solyc01g008090.3	0.00461411	-1.6	40S ribosomal protein S27 (AHRD V3.3 *-* M0TJU4_MUSAM)
Solyc06g072490.3	0.0049147	-1.6	40S ribosomal protein S3a (AHRD V3.3 *** RS3A_TOBAC)
Solyc12g008720.2	0.00691658	-1.6	60S ribosomal protein L31 (AHRD V3.3 *** W9QLF2_9ROSA)
Solyc08g013940.3	0.00868499	-1.6	Serine/Threonine kinase family protein (AHRD V3.3 *** G7ISK8_MEDTR)
Solyc03g005700.1	0.0187573	-1.6	Mitochondrial import receptor subunit TOM22 family protein (AHRD V3.3 *** B9GRD7_POPTR)
Solyc02g067380.3	0.0237447	-1.6	Transcription factor protein (AHRD V3.3 *** A0A0B0MSC8_GOSAR)
Solyc02g086450.1	0.0408595	-1.6	LOW QUALITY:cyclin-dependent kinase inhibitor (AHRD V3.3 *** AT1G10690.1)
Solyc00g049520.2	0.000193276	-1.61	LOW QUALITY:NAC domain protein 13 (AHRD V3.3 --* AT1G32870.2)
Solyc02g069850.3	0.00189129	-1.61	ribosomal protein S25
Solyc06g084230.3	0.00583338	-1.61	40S ribosomal protein S24 (AHRD V3.3 *** K4CUG0_SOLLC)
Solyc11g042610.2	0.00777451	-1.61	Ribosomal protein S5/S7 (AHRD V3.3 *** A0A103XH68_CYNCS)
Solyc01g006170.3	0.015826	-1.61	rRNA processing protein EBP2 (AHRD V3.3 *** B9ICW5_POPTR)
Solyc08g061490.3	0.0161347	-1.61	Damaged dna-binding 2, putative isoform 1 (AHRD V3.3 *-* A0A061GKJ3_THECC)
Solyc06g076080.2	0.0207801	-1.61	Cell division cycle protein 48-related / CDC48-related isoform 1 (AHRD V3.3 --* A0A061ERQ8_THECC)
Solyc03g031460.1	0.0212811	-1.61	Pentatricopeptide repeat-containing protein (AHRD V3.3 *** A0A103XF40_CYNCS)
Solyc01g066260.2	0.0222133	-1.61	LOW QUALITY:dyggve-melchior-clausen syndrome protein (AHRD V3.3 --* AT1G04200.2)
Solyc02g092510.3	0.0240976	-1.61	UPF0553 protein (AHRD V3.3 *** A0A151SC52_CAJCA)
Solyc01g105070.3	0.0252717	-1.61	LECEVI16G peroxidase precursor
Solyc00g322635.1	0.00299955	-1.62	MLP-like protein 28 (AHRD V3.3 *** AT1G70830.2)
Solyc02g080410.3	0.0060252	-1.62	Heat-shock protein, putative (AHRD V3.3 *** B9RXN2_RICCO)
Solyc03g044790.3	0.0113507	-1.62	methylesterase AY455313
Solyc07g065720.3	0.0156796	-1.62	complex 1 protein, LYR family protein (AHRD V3.3 *** AT5G51960.2),Pfam:PF13233
Solyc06g018110.3	0.0203064	-1.62	RNA binding protein
Solyc07g054470.1	0.0222717	-1.62	methionyl-tRNA synthetase (AHRD V3.3 -** AT5G10695.1)
Solyc01g102280.3	0.0239397	-1.62	Glutamate synthase 1 [NADH], chloroplastic (AHRD V3.3 --* GLT1_ORYSJ)
Solyc05g007100.3	0.0240306	-1.62	Single-stranded DNA-binding protein WHY1, chloroplastic (AHRD V3.3 *** WHY1_SOLTU)
Solyc02g067610.1	0.036738	-1.62	LOW QUALITY:DNA helicase INO80-like protein (AHRD V3.3 --* AT3G57300.2)
Solyc01g006060.3	0.0377246	-1.62	Dirigent protein (AHRD V3.3 *** K4ASH2_SOLLC)
Solyc11g039980.2	0.0379305	-1.62	ATP synthase subunit alpha (AHRD V3.3 *** Q5M9V4_TOBAC)
Solyc07g056640.1	0.0412958	-1.62	cycling DOF factor 2 (AHRD V3.3 --* AT5G39660.3)
Solyc05g054810.3	0.000867521	-1.63	60S ribosomal protein L35 (AHRD V3.3 *** RL35_EUPES)
Solyc02g089350.3	0.00330285	-1.63	Gibberellin-regulated family protein (AHRD V3.3 *** A0A061EVH9_THECC)
Solyc01g087880.3	0.00497308	-1.63	2,3-bisphosphoglycerate-dependent phosphoglycerate mutase (AHRD V3.3 *** A0A0B0Q2A1_GOSAR)
Solyc09g011420.3	0.00597773	-1.63	Ribosomal protein l7ae (AHRD V3.3 *** A0A0A0LF58_CUCSA)
Solyc08g083120.3	0.008776	-1.63	ubiquitin-ribosomal fusion protein
Solyc03g115030.3	0.0161362	-1.63	Eukaryotic aspartyl protease family protein, putative (AHRD V3.3 *** A0A061ELJ0_THECC)
Solyc07g008107.1	0.0233524	-1.63	Blue copper protein (AHRD V3.3 *-* A0A151SLU0_CAJCA)
Solyc08g023280.3	0.023919	-1.63	RING/U-box superfamily protein (AHRD V3.3 --* AT3G07200.3)
Solyc08g078845.1	0.0379505	-1.63	YbaK/aminoacyl-tRNA synthetase-associated domain-containing protein (AHRD V3.3 *-* AT4G16510.2)
Solyc03g095870.2	0.0408256	-1.63	Eukaryotic translation initiation factor 2 subunit alpha (AHRD V3.3 *-* A0A1C8FVJ5_TOBAC)
Solyc04g011390.1	0.0012432	-1.64	histone H4 (AHRD V3.3 *** AT2G28740.1)
Solyc04g010240.3	0.00347923	-1.64	60S ribosomal protein L35 (AHRD V3.3 *** RL35_EUPES)
Solyc09g092260.3	0.00439383	-1.64	chaperone protein dnaJ 20
Solyc09g009670.3	0.00847412	-1.64	Solute carrier family 35 protein (AHRD V3.3 *-* G7KWQ4_MEDTR)
Solyc10g018510.2	0.0292987	-1.64	bHLH transcription factor 063
Solyc01g110660.3	0.0315021	-1.64	SAUR-like auxin-responsive protein family (AHRD V3.3 *** AT2G21210.2)
Solyc04g014720.3	0.000146179	-1.65	60S ribosomal protein L6 (AHRD V3.3 *** RL6_MESCR)
Solyc03g006490.3	0.00223679	-1.65	glutaminase domain-containing protein
Solyc11g006070.2	0.00356945	-1.65	Peptidyl-prolyl cis-trans isomerase (AHRD V3.3 *** M1CSR8_SOLTU)
Solyc07g061890.1	0.0159598	-1.65	LOW QUALITY:Heat stress transcription factor B-4b, putative (AHRD V3.3 *** A0A061FAG8_THECC)
Solyc03g025270.3	0.00863918	-1.66	fibrillarin 2 (AHRD V3.3 *** AT4G25630.1)
Solyc11g073230.1	0.0216314	-1.66	Pentatricopeptide repeat-containing protein (AHRD V3.3 *** A0A118K7B7_CYNCS)
Solyc02g092430.1	0.00261491	-1.67	60S ribosomal protein L26-1 (AHRD V3.3 *** RL261_ARATH)
Solyc10g009190.1	0.00594581	-1.67	LOW QUALITY:glycine-rich protein (AHRD V3.3 *-* AT4G21620.2)
Solyc01g104230.3	0.0226083	-1.67	F-box protein (AHRD V3.3 *** A0A0B2RMW5_GLYSO)
Solyc03g097955.1	0.0238955	-1.67	S-adenosyl-L-methionine-dependent methyltransferases superfamily protein (AHRD V3.3 --* AT2G26200.2)
Solyc12g042650.2	0.00489971	-1.68	40S ribosomal protein S12 (AHRD V3.3 *** M1CSI4_SOLTU)
Solyc01g067440.3	0.00551002	-1.68	Glutaredoxin family protein (AHRD V3.3 *** AT3G21460.1)
Solyc01g005680.3	0.0181356	-1.68	Cytokinin riboside 5'-monophosphate phosphoribohydrolase (AHRD V3.3 *** K4ASD4_SOLLC)
Solyc01g110917.1	0.02154	-1.68	SAUR-like auxin-responsive protein family (AHRD V3.3 *** AT4G38840.1)
Solyc10g011730.3	0.0230862	-1.68	Arabinogalactan peptide 20 (AHRD V3.3 *** AGP20_ARATH)
Solyc05g044580.3	0.0231375	-1.68	Actin-like ATPase superfamily protein (AHRD V3.3 --* AT1G80460.2)
Solyc01g090920.3	0.0234105	-1.68	Calmodulin, putative (AHRD V3.3 *** B9RD69_RICCO)
Solyc01g095305.1	0.0306773	-1.68	Protein PHOSPHATE STARVATION RESPONSE 2 (AHRD V3.3 --* PHR2_ORYSJ)
Solyc02g094160.1	0.00123111	-1.69	Ribonucleoside-diphosphate reductase small chain (AHRD V3.3 *** RIR2_TOBAC)
Solyc12g096150.2	0.00327846	-1.69	60S ribosomal protein L13 (AHRD V3.3 *** K4DH88_SOLLC)
Solyc12g007060.1	0.0051217	-1.69	LOW QUALITY:serine-rich protein-like protein (AHRD V3.3 --* AT5G55980.1)
Solyc01g109500.3	0.00791242	-1.69	Dehydration-responsive protein RD22, putative (AHRD V3.3 *** B9RBD8_RICCO)
Solyc01g108000.3	0.0379822	-1.69	Kinase family protein (AHRD V3.3 *** D7L9X7_ARALL)
Solyc05g052810.3	0.00374431	-1.7	60S ribosomal protein L35a (AHRD V3.3 *** B6VC50_VERFO)
Solyc05g052830.3	0.0240842	-1.7	Proline transporter 3 (AHRD V3.3 *** Q9XE50_SOLLC)
Solyc01g079940.3	0.0250185	-1.7	Eukaryotic aspartyl protease family protein (AHRD V3.3 *** AT1G03220.1)
Solyc06g009800.2	0.0475189	-1.7	Pentatricopeptide repeat-containing protein family (AHRD V3.3 *-* A0A151SLA5_CAJCA)
Solyc01g104370.3	0.00306164	-1.71	60S acidic ribosomal protein P1 (AHRD V3.3 *** A0A199VEQ5_ANACO)
Solyc01g100490.3	0.00543738	-1.71	chloronerva
Solyc01g095240.3	0.0109022	-1.71	LOW QUALITY:Membrane-associated kinase regulator-like protein, putative (AHRD V3.3 *** A0A072U9K3_MEDTR)
Solyc02g092830.3	0.0176661	-1.71	caspase-6 protein (AHRD V3.3 *** AT2G15000.7)
Solyc02g090440.3	0.0141201	-1.72	ankyrin repeat family protein (AHRD V3.3 --* AT4G05040.7)
Solyc12g077467.1	0.0158379	-1.72	Zinc finger family protein (AHRD V3.3 *-* B9GY13_POPTR)
Solyc08g066520.3	0.0169332	-1.72	nuclear fusion defective 6 (AHRD V3.3 --* AT2G20585.7)
Solyc07g064830.3	0.0240111	-1.72	Starch branching enzyme III (AHRD V3.3 *** I0B8P4_WHEAT)
Solyc04g026100.1	0.00294096	-1.73	Ribosomal protein S16 (AHRD V3.3 *** A9P8S1_POPTR)
Solyc01g109220.3	0.00595176	-1.73	Mitochondrial import receptor subunit TOM6 homolog (AHRD V3.3 *** TOM6_ARATH)
Solyc05g051000.3	0.00637552	-1.73	40S ribosomal protein S13 (AHRD V3.3 *** RS13_SOYBN)
Solyc03g078290.3	0.00858129	-1.73	Ribosomal protein S13 (AHRD V3.3 *** A0A103XPA4_CYNCS)
Solyc01g014140.3	0.0152119	-1.73	Hcr9-OR3A (AHRD V3.3 *-* Q4VSU2_SOLPI)
Solyc01g087630.2	0.0173955	-1.73	Cinnamyl alcohol dehydrogenase (AHRD V3.3 *-* Q6USQ8_QUESU)
Solyc02g086490.3	0.0211698	-1.73	Oleosin (AHRD V3.3 *** K4BBF7_SOLLC)
Solyc02g082720.3	0.0371653	-1.73	Trypsin-like peptidase domain protein (AHRD V3.3 *** G7KBB1_MEDTR)
Solyc06g063060.3	0.038063	-1.73	Auxin-repressed protein-like protein (AHRD V3.3 *** Q84KS0_TOBAC)
Solyc09g083370.3	0.0030971	-1.74	Ribosomal protein S19 family protein (AHRD V3.3 *** AT5G09510.1)
Solyc11g020890.2	0.00327921	-1.74	40S ribosomal S29-like protein (AHRD V3.3 *** A0A0B0MKW3_GOSAR)
Solyc08g081960.2	0.0252625	-1.74	Solanum Lycopersicum Cytokinin Response Factor 2
Solyc09g092150.1	0.0361336	-1.74	Pentatricopeptide repeat-containing protein (AHRD V3.3 *** A0A103YJT4_CYNCS)
Solyc02g083835.1	3.613e-11	-1.75	Chaperone DnaJ-like protein (AHRD V3.3 *** A0A1C6ZYA6_MEDSA)
Solyc10g085850.1	0.00230964	-1.75	LOW QUALITY:S-locus lectin protein kinase family protein (AHRD V3.3 --* AT1G61360.1)
Solyc01g006160.3	0.00340501	-1.75	60S acidic ribosomal protein P1 (AHRD V3.3 *** B9IDH5_POPTR)
Solyc10g083740.2	0.0039215	-1.75	60S ribosomal protein L24 (AHRD V3.3 *** RL24_PRUAV)
Solyc08g078720.3	0.00873638	-1.75	Heat-shock protein, putative (AHRD V3.3 *-* B9R9S7_RICCO)
Solyc04g007825.1	0.0230841	-1.75	MLP-like protein 28 (AHRD V3.3 *** AT1G70830.1)
Solyc06g060590.3	0.00738052	-1.76	Bidirectional sugar transporter SWEET (AHRD V3.3 *** K4C6N9_SOLLC)
Solyc10g045310.2	0.00810409	-1.76	Oxidoreductase/ transition metal ion binding protein (AHRD V3.3 *** D7MCM0_ARALL)
Solyc08g007430.2	0.0205806	-1.76	NIT2
Solyc01g006090.3	0.0241058	-1.76	rRNA processing protein EBP2 (AHRD V3.3 *** B9ICW5_POPTR)
Solyc09g090890.2	0.0271606	-1.76	DNA mismatch repair protein (AHRD V3.3 *-* Q1XBQ6_SOLLC)
Solyc02g093400.2	0.0461836	-1.76	Protein MurJ (AHRD V3.3 *-* A0A1D1XN27_9ARAE)
Solyc04g011850.1	0.0476831	-1.76	Glutaredoxin family protein (AHRD V3.3 *** B9I9V9_POPTR)
Solyc05g052030.1	2.26638e-06	-1.77	ethylene response factor 4
Solyc03g025520.3	0.00344822	-1.77	60S ribosomal protein L36 (AHRD V3.3 *** K4BF25_SOLLC)
Solyc06g074430.3	0.00395588	-1.77	60s acidic ribosomal protein-like protein (AHRD V3.3 *** Q3HVP0_SOLTU)
Solyc09g066430.3	0.00549491	-1.77	60S ribosomal protein L14, putative (AHRD V3.3 *** B9SV21_RICCO)
Solyc11g071490.2	0.00564856	-1.77	60S ribosomal protein L30 (AHRD V3.3 *** RL30_LUPLU)
Solyc01g111235.1	0.00855152	-1.77	Dirigent protein (AHRD V3.3 *** M0ZMW5_SOLTU)
Solyc03g079865.1	0.00865568	-1.77	Retrovirus-related Pol polyprotein LINE-1 (AHRD V3.3 --* A0A151SL68_CAJCA)
Solyc07g008240.3	0.0129043	-1.77	Non-symbiotic hemoglobin 1 (AHRD V3.3 *** HBL1_GOSHI)
Solyc07g048010.3	0.0159353	-1.77	Thymidylate kinase (AHRD V3.3 *** ZEUS1_ARATH)
Solyc06g005390.1	0.0231138	-1.77	Histone H2B (AHRD V3.3 *** K4C323_SOLLC)
Solyc02g093610.3	0.0279101	-1.77	BAG family molecular chaperone regulator 2 (AHRD V3.3 *** A0A0B0PLU4_GOSAR)
Solyc09g091060.3	0.0473508	-1.77	UPF0329 protein ECU01_0100/ECU01_1510/ECU08_0030, putative isoform 2 (AHRD V3.3 *** A0A061ELC2_THECC)
Solyc02g077590.1	0.00170679	-1.78	Homeobox-leucine zipper protein family (AHRD V3.3 *-* AT1G69780.1)
Solyc08g066610.3	0.00333006	-1.78	EPIDERMAL PATTERNING FACTOR-like protein 9 (AHRD V3.3 *** A0A0B2PPB1_GLYSO)
Solyc02g062930.3	0.00586074	-1.78	vacuolar iron transporter (VIT) family protein (AHRD V3.3 --* AT4G27860.4)
Solyc05g012250.2	0.0105586	-1.78	Purple acid phosphatase (AHRD V3.3 --* A0A0V0INC4_SOLCH)
Solyc01g068540.3	0.0422227	-1.78	Homeodomain-like superfamily protein, putative (AHRD V3.3 *** A0A061DHF1_THECC)
Solyc09g092080.3	0.00888094	-1.79	Ribosomal protein l7ae (AHRD V3.3 *** A0A0A0LF58_CUCSA)
Solyc01g079180.3	0.0222554	-1.79	Pectinesterase (AHRD V3.3 *** K4AXG4_SOLLC)
Solyc03g025690.3	0.0230519	-1.79	Chaperone protein DnaJ (AHRD V3.3 *** A0A1D1YJ37_9ARAE)
Solyc04g014320.1	0.0452279	-1.79	LOW QUALITY:Leguminosin group485 secreted peptide (AHRD V3.3 *** G7KAG0_MEDTR)
Solyc05g053440.3	0.00187242	-1.8	60S ribosomal protein L29, putative (AHRD V3.3 *** B9RZN1_RICCO)
Solyc12g087870.2	0.01331	-1.8	Purine permease-like protein (AHRD V3.3 *** G7J4H5_MEDTR),Pfam:PF16913
Solyc03g120260.3	0.0220506	-1.8	Coatomer beta subunit, putative (AHRD V3.3 *-* B9SQC0_RICCO)
Solyc10g007510.2	0.0349359	-1.8	Glucan endo-1,3-beta-glucosidase (AHRD V3.3 *** A0A0B0NBZ5_GOSAR)
Solyc12g008700.2	0.00198517	-1.81	peroxisomal ABC transporter 1 (AHRD V3.3 --* AT4G39850.4)
Solyc04g057993.1	0.0031989	-1.81	30S ribosomal protein S8, putative (AHRD V3.3 *-* B9SR47_RICCO)
Solyc03g005900.3	0.0059405	-1.81	GDSL-lipase protein (AHRD V3.3 *** Q08ET5_CAPAN)
Solyc02g070640.3	0.00834614	-1.81	60S ribosomal protein L18a (AHRD V3.3 *-* Q3HRW8_SOLTU)
Solyc10g084630.2	0.0125626	-1.81	RNA-binding family protein (AHRD V3.3 *** A0A061ET74_THECC)
Solyc09g005030.2	0.0204755	-1.81	Homeodomain-like superfamily protein (AHRD V3.3 *-* AT2G40260.1)
Solyc10g083320.2	0.0379268	-1.81	Small auxin up-regulated RNA82
Solyc10g076240.2	0.0486863	-1.81	Peroxidase (AHRD V3.3 *** A0A0E0NC86_ORYRU)
Solyc03g113910.3	0.00159433	-1.82	Snakin-2-like protein (AHRD V3.3 *** I3VFF2_TOBAC)
Solyc01g110560.3	0.0178889	-1.82	Small auxin up-regulated RNA3
Solyc07g065410.1	0.0295032	-1.82	LOW QUALITY:Melanin-concentrating hormone receptor 1 (AHRD V3.3 *** A0A1D1ZFH6_9ARAE)
Solyc07g008205.1	0.0374323	-1.82	Epidermal patterning factor-like protein (AHRD V3.3 *** G7JE34_MEDTR),Pfam:PF17181
Solyc06g048850.3	0.0493459	-1.82	methionine-S-oxide reductase (AHRD V3.3 *-* AT2G17705.1)
Solyc08g068080.3	0.0388347	-1.83	LOW QUALITY:NHL domain protein (AHRD V3.3 --* AT5G14895.1)
Solyc12g099330.2	0.00346578	-1.84	Unknown protein (AHRD V3.3 )
Solyc07g056670.3	0.00875731	-1.84	gibberellin 2-oxidase 2
Solyc07g066385.1	0.00967849	-1.85	alpha-vacuolar processing enzyme (AHRD V3.3 --* AT2G25940.1)
Solyc02g076930.2	0.0264385	-1.85	U-box domain-containing 7-like protein (AHRD V3.3 *** A0A0B0P2C2_GOSAR)
Solyc07g052135.1	0.030662	-1.85	Sesquiterpene synthase (AHRD V3.3 *-* G8H5N2_SOLHA)
Solyc05g005230.3	1.62896e-05	-1.86	Plant protein 1589 of Uncharacterized protein function (AHRD V3.3 *** A0A061EE06_THECC)
Solyc12g040320.2	0.0361266	-1.86	Leucine-rich repeat (LRR) family protein (AHRD V3.3 *** AT5G07910.1)
Solyc02g021400.2	0.00356063	-1.87	40S ribosomal protein S28 (AHRD V3.3 *-* W9SEX7_9ROSA)
Solyc07g032150.3	0.0216524	-1.87	Unknown protein (AHRD V3.3 )
Solyc09g092320.3	0.0232959	-1.87	RNA binding protein (AHRD V3.3 *** O23793_NICSY)
Solyc07g042510.3	0.0410389	-1.87	Bax inhibitor-1 family protein (AHRD V3.3 *** AT4G15470.1)
Solyc01g005590.2	0.000967202	-1.88	Arabinogalactan peptide 14 (AHRD V3.3 *** A0A151TQT2_CAJCA)
Solyc05g023720.1	0.012639	-1.88	Cytochrome f (AHRD V3.3 *** CYF_SOLTU)
Solyc04g072375.1	0.0472893	-1.88	LOW QUALITY:RING/U-box superfamily protein (AHRD V3.3 *-* AT1G63840.1)
Solyc03g034000.3	0.000758337	-1.89	bHLH transcription factor 020
Solyc06g082460.1	0.0134361	-1.89	LOW QUALITY:ovate family protein 14
Solyc02g085150.3	0.0231946	-1.89	Late embryogenesis abundant (LEA) protein (AHRD V3.3 *** AT4G36600.2)
Solyc03g111350.3	0.0240672	-1.89	Deoxycytidylate deaminase (AHRD V3.3 *** A0A0B2RRI8_GLYSO)
Solyc11g010360.2	0.0371398	-1.89	MIZU-KUSSEI-like protein (Protein of unknown function, DUF617) (AHRD V3.3 *** AT5G65340.1)
Solyc06g084050.3	0.00821648	-1.9	LOW QUALITY:isochorismate synthase 2 (AHRD V3.3 --* AT1G18870.2)
Solyc02g038690.1	0.0089679	-1.9	Histone H2B (AHRD V3.3 *** K4B5W3_SOLLC)
Solyc03g119180.1	0.03672	-1.9	LOW QUALITY:Lysine--tRNA ligase (AHRD V3.3 --* V7B2W1_PHAVU)
Solyc07g055990.3	0.0379191	-1.9	Xyloglucan endotransglucosylase/hydrolase 7 (AHRD V1 **** C0IRG6_ACTDE)
Solyc02g094480.3	0.0482701	-1.9	Pentatricopeptide repeat-containing protein (AHRD V3.3 *** A0A118K5K5_CYNCS)
Solyc08g080650.3	9.88537e-05	-1.91	Osmotin-like protein (Fragment) IPR001938 Thaumatin, pathogenesis-related
Solyc03g031890.3	0.00891557	-1.91	Oxidative stress 3, putative isoform 2 (AHRD V3.3 *** A0A061GIQ6_THECC)
Solyc04g016390.2	0.0108526	-1.91	50S ribosomal protein L33 (AHRD V3.3 *** J7FNN0_OLEEU)
Solyc02g092190.1	0.0204454	-1.91	LOW QUALITY:Disease resistance protein (TIR-NBS-LRR class) family (AHRD V3.3 --* AT5G46450.3)
Solyc07g053055.1	0.0215539	-1.91	aldehyde oxidase 1 (AHRD V3.3 --* AT5G20960.2)
Solyc02g090540.3	0.0305338	-1.91	NAD(P)-binding Rossmann-fold superfamily protein (AHRD V3.3 *** A0A061DHS1_THECC)
Solyc07g051940.3	0.0414296	-1.91	Sesquiterpene synthase (AHRD V3.3 *** G8H5N2_SOLHA)
Solyc12g006770.1	0.0446386	-1.91	glutathione S-transferase zeta 1 (AHRD V3.3 --* AT2G02390.2)
Solyc12g088930.1	0.0094619	-1.92	MIZU-KUSSEI-like protein (Protein of unknown function, DUF617) (AHRD V3.3 *** AT5G42680.2)
Solyc09g007440.3	0.021129	-1.92	Dead box ATP-dependent RNA helicase, putative (AHRD V3.3 *** B9S4I3_RICCO)
Solyc07g044910.1	0.0365858	-1.92	LOW QUALITY:NAC domain containing protein 90 (AHRD V3.3 --* AT5G22380.1)
Solyc12g038090.1	0.0380682	-1.92	LOW QUALITY:membrane-anchored ubiquitin-fold protein 1 precursor (AHRD V3.3 --* AT3G01050.5)
Solyc06g064600.1	0.0412684	-1.92	Pentatricopeptide repeat-containing family protein (AHRD V3.3 *** B9I6N6_POPTR)
Solyc01g016470.3	0.00593855	-1.93	60S acidic ribosomal protein P1 (AHRD V3.3 *** B9IDH5_POPTR)
Solyc05g046020.3	0.0169886	-1.93	Peroxidase (AHRD V3.3 *** K4C0T5_SOLLC)
Solyc04g011870.1	0.0305017	-1.93	Glutaredoxin family protein (AHRD V3.3 *** B9I9V9_POPTR)
Solyc03g034165.1	0.0484476	-1.93	downstream target of AGL15-4 (AHRD V3.3 --* AT1G79760.2)
Solyc07g062490.1	0.00443992	-1.94	Serine/threonine-protein kinase (AHRD V3.3 *-* A0A067JEE7_JATCU)
Solyc08g008590.3	0.00869463	-1.94	ubiquitin-ribosomal fusion protein
Solyc09g090180.1	0.0224018	-1.94	LIGHT-DEPENDENT SHORT HYPOCOTYLS-like protein (DUF640) (AHRD V3.3 *** AT1G07090.1)
Solyc08g006900.3	0.00272407	-1.95	60S ribosomal protein L32, putative (AHRD V3.3 *** B9T5H6_RICCO)
Solyc01g009100.3	0.0038857	-1.95	60S ribosomal protein L30 (AHRD V3.3 *** RL30_LUPLU)
Solyc01g098100.2	0.00653371	-1.95	60S ribosome subunit biogenesis protein NIP7 homolog (AHRD V3.3 *** K4B0J7_SOLLC)
Solyc09g007730.3	0.0149946	-1.95	Kinase family protein (AHRD V3.3 *** B9NAB5_POPTR)
Solyc03g095980.3	0.0209258	-1.96	bHLH transcription factor 021
Solyc11g007803.1	0.023828	-1.96	Ribonucleases P/MRP protein subunit POP1, putative (AHRD V3.3 *-* A0A061DRG1_THECC)
Solyc12g014500.2	0.0309573	-1.96	S-adenosyl-L-methionine:carboxyl methyltransferase family protein (AHRD V3.3 *** B9GJG7_POPTR)
Solyc06g064530.1	0.0368545	-1.96	Major facilitator superfamily protein (AHRD V3.3 --* AT1G22570.2)
Solyc06g073990.2	0.00707449	-1.97	Gb:AAF02129.1, putative (AHRD V3.3 *** A0A061GVZ4_THECC)
Solyc04g081130.1	0.032381	-1.97	LOW QUALITY:glyoxal oxidase-related protein (AHRD V3.3 *** AT1G19900.1)
Solyc12g036793.1	0.0373097	-1.97	Leucine-rich repeat receptor-like protein kinase family protein (AHRD V3.3 *-* AT4G08850.1)
Solyc07g062480.1	0.0406862	-1.97	Serine/threonine-protein kinase (AHRD V3.3 *-* M1CRP0_SOLTU)
Solyc02g069070.3	0.00851118	-1.98	ribonuclease H2 subunit C-like protein (AHRD V3.3 *** AT2G39440.2)
Solyc03g117080.3	0.0114608	-1.98	Mitochondrial glycoprotein family protein (AHRD V3.3 *** AT1G15870.1)
Solyc05g008480.3	0.0131655	-1.98	Histone chaperone (AHRD V3.3 *** A9TVI5_PHYPA)
Solyc02g083725.1	0.023041	-1.98	MLO-like protein (AHRD V3.3 *-* K4BAP0_SOLLC)
Solyc04g072660.3	0.0022393	-1.99	60S ribosomal protein L30 (AHRD V3.3 *** RL30_LUPLU)
Solyc06g066420.3	0.00962593	-1.99	Oxidative stress 3, putative isoform 1 (AHRD V3.3 *** A0A061GC09_THECC)
Solyc04g007200.3	0.0113706	-1.99	methylketone synthase IIb
Solyc01g008520.3	0.0241053	-1.99	DNA repair XRCC2-like protein (AHRD V3.3 *** A0A0B0P902_GOSAR)
Solyc05g014275.1	0.0320779	-2	HAT dimerisation domain-containing protein-like (AHRD V3.3 *-* C8TFH5_ORYSI)
Solyc12g009880.1	0.00320716	-2.01	LOW QUALITY:Serine-rich protein-related (AHRD V3.3 *** A0A061GN42_THECC)
Solyc12g027770.2	0.0202445	-2.01	Rhodanese-like domain-containing protein (AHRD V3.3 *** A0A118K4F8_CYNCS)
Solyc05g054430.3	0.0222311	-2.01	DNA replication complex GINS protein PSF2 (AHRD V3.3 *** K4C2C1_SOLLC)
Solyc08g078620.1	0.0276576	-2.01	LOW QUALITY:Werner Syndrome-like exonuclease (AHRD V3.3 *** W9SHU8_9ROSA)
Solyc02g078530.3	0.0310626	-2.01	Kinase family protein (AHRD V3.3 *** B9IG83_POPTR)
Solyc11g012195.1	0.0380475	-2.01	DNA-directed RNA polymerase (AHRD V3.3 *** G7KSV3_MEDTR)
Solyc09g007520.3	0.00873375	-2.02	Peroxidase (AHRD V3.3 *** K4CQE1_SOLLC)
Solyc09g015100.3	0.0160721	-2.02	Endoribonuclease Dicer homolog 2 (AHRD V3.3 --* DCL2_ARATH)
Solyc11g006710.2	0.0218634	-2.02	Cationic amino acid transporter, putative (AHRD V3.3 *** B9RPW6_RICCO)
Solyc04g017720.3	7.99361e-15	-2.03	Gibberellin-regulated family protein (AHRD V3.3 *** A0A061EVH9_THECC)
Solyc12g010350.2	0.00347999	-2.03	60S ribosomal protein L39 (AHRD V3.3 *** RL39_MAIZE)
Solyc04g008110.3	0.00885946	-2.03	Histidine kinase (AHRD V3.3 *** Q2ACB8_MAIZE)
Solyc00g026160.3	0.0241603	-2.03	Ferric reductase oxidase (AHRD V3.3 *** V9HYU8_MANES)
Solyc11g006740.2	0.0415629	-2.03	F-box protein PP2 (AHRD V3.3 *** A0A059PC27_CICAR)
Solyc04g080500.3	0.0083024	-2.04	Myb family transcription factor family protein (AHRD V3.3 *** B9H0R6_POPTR)
Solyc03g115005.1	0.0239331	-2.04	Oxygen-evolving enhancer protein 3 (AHRD V3.3 *** B6SQ77_MAIZE)
Solyc07g026720.2	0.0347369	-2.04	Calcium-transporting ATPase (AHRD V3.3 *-* M1AEH0_SOLTU)
Solyc11g011655.1	0.0354942	-2.04	SAUR-like auxin-responsive protein family (AHRD V3.3 *** AT5G18030.1)
Solyc02g092537.1	0.0375511	-2.04	Acetyl-coenzyme A carboxylase carboxyl transferase subunit beta, chloroplastic (AHRD V3.3 --* ACCD_CITSI)
Solyc09g059220.1	0.0380498	-2.04	LOW QUALITY:neuronal acetylcholine receptor subunit alpha-5 (AHRD V3.3 *** AT2G31490.1)
Solyc02g092110.3	0.00355596	-2.05	Phytosulfokines 3 family protein (AHRD V3.3 *** B9IBM1_POPTR)
Solyc09g090610.3	0.00846688	-2.05	50S ribosomal protein L14 (AHRD V3.3 *** A0A0K9PMD0_ZOSMR)
Solyc01g109720.3	0.0237049	-2.05	alpha/beta-Hydrolases superfamily protein (AHRD V3.3 *** AT2G18360.1)
Solyc04g011735.1	0.0309836	-2.05	methyl-CPG-binding domain 7 (AHRD V3.3 --* AT5G59800.1)
Solyc04g008090.3	0.0378856	-2.05	PLATZ transcription factor family protein, putative (AHRD V3.3 *** A0A061EGB3_THECC)
Solyc02g089960.3	0.0132233	-2.06	Transmembrane protein 220 (AHRD V3.3 *** A0A1D1Z4L8_9ARAE)
Solyc05g015330.1	0.0219982	-2.06	LOW QUALITY:Nuclear transcription factor Y protein (AHRD V3.3 *** G7JC00_MEDTR)
Solyc12g057075.1	0.0234734	-2.06	Purine permease-like protein (AHRD V3.3 *-* G7J4H5_MEDTR)
Solyc04g014770.1	0.0349381	-2.06	LOW QUALITY:transmembrane protein (AHRD V3.3 --* AT5G14330.1)
Solyc02g065430.1	0.0200187	-2.07	LOW QUALITY:DUF4228 domain protein (AHRD V3.3 *** G7K9H8_MEDTR)
Solyc09g097810.3	0.0393717	-2.08	SAR8.2 (AHRD V3.3 *** Q9SEM2_CAPAN)
Solyc09g097840.2	0.0210488	-2.09	Pentatricopeptide repeat-containing protein (AHRD V3.3 *** A0A103XYK9_CYNCS)
Solyc06g066820.3	0.0449648	-2.09	Le3OH-13b-hydroxylase
Solyc03g116170.3	0.00835015	-2.1	Nucleosome assembly protein family (AHRD V3.3 *** A9RDJ7_PHYPA)
Solyc03g083730.1	0.00858054	-2.1	Plant invertase/pectin methylesterase inhibitor superfamily protein (AHRD V3.3 *** AT5G62360.1)
Solyc05g006420.3	0.0115545	-2.1	Two-component response regulator (AHRD V3.3 *** W9S1Y9_9ROSA)
Solyc02g085230.3	0.0232483	-2.1	Nucleolar 6 (AHRD V3.3 *** A0A0B0N3X3_GOSAR)
Solyc04g076260.2	0.00851906	-2.11	thionin-like protein (AHRD V3.3 *** AT5G64816.4)
Solyc10g076410.1	0.00954698	-2.11	Abscisic acid receptor (AHRD V3.3 *** G7KT83_MEDTR)
Solyc07g008650.3	0.0201088	-2.11	Deaminase-related family protein (AHRD V3.3 *** B9HAZ0_POPTR)
Solyc05g024190.3	0.0232312	-2.11	Chlorophyll synthase (AHRD V3.3 --* C3W4Q2_TOBAC)
Solyc01g102265.1	0.035636	-2.11	RING/U-box superfamily protein (AHRD V3.3 *** AT3G42830.1)
Solyc05g007210.2	0.0301865	-2.12	BHLH transcription factor (AHRD V3.3 *** C6TBH0_SOYBN)
Solyc06g084370.1	0.032397	-2.12	LOW QUALITY:sodium hydrogen exchanger 4 (AHRD V3.3 --* AT3G06370.4)
Solyc01g005470.3	0.00125933	-2.13	PLANT CADMIUM RESISTANCE 2 (AHRD V3.3 *** AT1G14870.1)
Solyc02g092550.3	0.00310118	-2.13	LOB domain-containing protein, putative (AHRD V3.3 *** B9SGY6_RICCO)
Solyc04g008810.3	0.00123941	-2.14	40S ribosomal S26-like protein (AHRD V3.3 *** I3S2G2_MEDTR)
Solyc12g038980.2	0.0078682	-2.14	H/ACA ribonucleoprotein complex subunit 2-like protein (AHRD V3.3 *** A0A0B2QAW4_GLYSO)
Solyc12g006910.2	0.0193265	-2.14	Cadmium tolerant 1 (AHRD V3.3 *** B5BSU1_9POAL)
Solyc07g066330.3	0.0204774	-2.14	NAC domain-containing protein (AHRD V3.3 *** W0C8Y8_9FABA)
Solyc04g011790.1	0.0322567	-2.14	Glutaredoxin (AHRD V3.3 *** A0A103Y7J3_CYNCS)
Solyc12g044250.2	0.036703	-2.14	Glyoxylate reductase (AHRD V3.3 *** A0A0B0MTB0_GOSAR)
Solyc01g110790.3	0.0205978	-2.15	SAUR-like auxin-responsive protein family (AHRD V3.3 *** AT5G18010.1)
Solyc10g009530.3	0.0208291	-2.15	Unknown protein (AHRD V3.3 )
Solyc08g036520.2	0.030075	-2.15	Diphosphomevalonate decarboxylase (AHRD V3.3 --* A0A0N6YKZ0_NOTNI)
Solyc10g009150.3	0.00335258	-2.16	Organ-specific protein S2 (AHRD V3.3 *** F2VPS2_SOLNI)
Solyc09g092560.3	0.0240663	-2.16	Cytochrome P450 (AHRD V3.3 *** A0A061FSW2_THECC)
Solyc03g113890.1	0.029728	-2.16	LOW QUALITY:Zinc finger family protein (AHRD V3.3 *-* B9HJ48_POPTR)
Solyc06g007210.3	0.00640017	-2.17	60S ribosomal protein L41 (AHRD V3.3 -** RL41_ARATH)
Solyc10g084265.1	0.0118809	-2.17	transmembrane protein (AHRD V3.3 --* AT5G03120.2)
Solyc02g064980.1	0.0312746	-2.17	LOW QUALITY:MAP kinase kinase kinase
Solyc02g088750.2	0.0363797	-2.17	UDP-glycosyltransferase (AHRD V3.3 *** A0A067XU00_CICAR)
Solyc08g066740.3	0.00597294	-2.18	Major facilitator superfamily domain-containing protein (AHRD V3.3 *** A0A0K9PJ16_ZOSMR)
Solyc10g017960.2	0.0210759	-2.18	F-box protein PP2-A13 (AHRD V3.3 *** P2A13_ARATH)
Solyc08g079250.3	0.0217468	-2.18	Protease inhibitor/seed storage/lipid transfer protein family protein (AHRD V3.3 *** C0KHK1_9CARY)
Solyc06g068190.2	0.031925	-2.18	Ubiquitin system component Cue protein, putative (AHRD V3.3 *-* A0A061GFQ5_THECC)
Solyc03g006310.3	0.00962465	-2.19	nuclear fusion defective 6 (AHRD V3.3 *** AT2G20585.7)
Solyc03g034395.1	0.0303115	-2.19	Glutamate receptor (AHRD V3.3 *-* M1CHN3_SOLTU)
Solyc04g008030.2	0.00868335	-2.2	Cleavage and polyadenylation specificity factor, putative (AHRD V3.3 *** B9SJ31_RICCO)
Solyc07g009230.3	0.031624	-2.2	Defensin-like protein (AHRD V3.3 -** G7LB12_MEDTR)
Solyc01g110630.3	0.00633303	-2.21	Small auxin up-regulated RNA9
Solyc10g083580.2	0.0163792	-2.21	Phytosulfokine 3, putative (AHRD V3.3 *** A0A061ESV9_THECC)
Solyc08g078460.3	0.00593166	-2.22	Oxidoreductase family protein (AHRD V3.3 *** AT4G17370.1)
Solyc01g060020.3	0.0376721	-2.22	beta-1,3-glucanase TOMB13GLUB
Solyc01g008510.3	0.0405272	-2.22	Photosystem II 5 kDa protein (AHRD V3.3 *** G7IWU5_MEDTR)
Solyc08g080640.2	0.0060517	-2.23	Osmotin-like protein (Fragment) IPR017949 Thaumatin, conserved site IPR001938
Solyc01g107100.3	0.013888	-2.23	LOW QUALITY:beta-1,4-xylosidase (AHRD V3.3 *** AT3G19615.1)
Solyc06g071725.1	0.0152155	-2.23	U-box domain-containing protein 33 (AHRD V3.3 *** W9RIP2_9ROSA)
Solyc01g079530.3	0.00825781	-2.24	RING/FYVE/PHD zinc finger superfamily protein (AHRD V3.3 *** AT1G02610.1)
Solyc10g050465.1	0.0376258	-2.24	zinc ion binding/nucleic acid binding/hydrolase (AHRD V3.3 --* AT1G48360.4)
Solyc10g083170.2	0.0119378	-2.25	NAD(P)-binding Rossmann-fold superfamily protein (AHRD V3.3 *** A0A061EUQ7_THECC)
Solyc00g013120.3	0.0234951	-2.25	LOW protein: NADH-ubiquinone oxidoreductase chain-like protein (AHRD V3.3 *-* ATMG01330.1)
Solyc09g010980.1	0.0243436	-2.25	LOW QUALITY:cyclin-dependent kinase inhibitor (AHRD V3.3 -** AT5G02220.1)
Solyc05g050790.2	0.0416427	-2.25	Ethylene-responsive transcription factor, putative (AHRD V3.3 *-* B9RCZ9_RICCO)
Solyc12g006260.1	0.000340136	-2.26	L-fucokinase/GDP-L-fucose pyrophosphorylase (AHRD V3.3 --* AT1G01220.7)
Solyc01g104210.2	0.0121465	-2.26	GNS1/SUR4 membrane protein family (AHRD V3.3 *** AT3G06470.1)
Solyc07g052203.1	0.000353625	-2.27	Unknown protein (AHRD V3.3 )
Solyc02g078160.3	0.00344431	-2.27	DUF506 family protein (AHRD V3.3 *** G7IPT8_MEDTR)
Solyc10g078540.2	0.00326816	-2.28	H/ACA ribonucleoprotein complex subunit 1-like protein 1, putative, expressed (AHRD V3.3 *-* Q2R242_ORYSJ)
Solyc05g046290.3	0.0102252	-2.3	Xyloglucan endotransglucosylase/hydrolase (AHRD V3.3 *** K4C0W2_SOLLC)
Solyc04g015820.1	0.0128184	-2.3	LOW QUALITY:ferrochelatase 1 (AHRD V3.3 --* AT5G26030.2)
Solyc06g007970.3	0.0241133	-2.31	Tetratricopeptide repeat (TPR)-like superfamily protein (AHRD V3.3 *** AT5G48850.1)
Solyc08g069040.3	0.00133788	-2.32	Peroxidase (AHRD V3.3 *** K4CMC4_SOLLC)
Solyc02g089420.1	0.00464196	-2.32	BZIP transcription factor family protein (AHRD V3.3 *** B9NC16_POPTR)
Solyc07g051860.1	0.0181284	-2.32	MAP kinase kinase kinase 50
Solyc01g097970.3	0.00418892	-2.33	Deoxyuridine 5'-triphosphate nucleotidohydrolase (AHRD V3.3 *** DUT_SOLLC)
Solyc04g078280.3	0.0239456	-2.33	microtubule-associated protein 65-7 (AHRD V3.3 --* AT1G14690.2)
Solyc01g081600.3	0.0294101	-2.34	Non-specific lipid-transfer protein (AHRD V3.3 *** K4AY52_SOLLC)
Solyc11g008030.2	0.0235529	-2.35	Monocopper oxidase-like protein SKU5 (AHRD V3.3 *** A0A0B2NUZ0_GLYSO)
Solyc08g066220.3	0.0253752	-2.35	Histidine decarboxylase (AHRD V3.3 *** W0KR26_TOBAC)
Solyc02g080560.1	0.0185053	-2.36	LOW QUALITY:F-box family protein (AHRD V3.3 --* AT4G35930.4)
Solyc05g013620.2	0.0259877	-2.36	Retrovirus-related Pol polyprotein from transposon TNT 1-94 (AHRD V3.3 --* A0A151U3Z8_CAJCA)
Solyc05g054850.1	0.0133694	-2.37	membrane-associated kinase regulator (AHRD V3.3 *** AT2G39370.1)
Solyc04g011840.1	0.0160853	-2.37	Glutaredoxin family protein (AHRD V3.3 *** B9I9V9_POPTR)
Solyc10g079810.1	0.0133127	-2.38	LOW QUALITY:mediator of RNA polymerase II transcription subunit (AHRD V3.3 --* AT2G10440.2)
Solyc04g005660.3	0.0135576	-2.38	Transcription factor protein (AHRD V3.3 *** A0A0B0MSC8_GOSAR)
Solyc05g005680.3	0.020255	-2.38	Xyloglucan endotransglucosylase/hydrolase (AHRD V3.3 *** K4BW96_SOLLC)
Solyc07g052490.3	0.0337996	-2.41	Myb transcription factor (AHRD V3.3 *-* A0A072UKM9_MEDTR)
Solyc11g070070.2	0.0112322	-2.42	Zinc finger transcription factor 70
Solyc12g056160.2	0.0310749	-2.42	Cation/H(+) antiporter (AHRD V3.3 *** A0A0K9NMD6_ZOSMR)
Solyc04g074900.3	0.0053629	-2.44	40S ribosomal protein S21 (AHRD V3.3 *** K4BU28_SOLLC)
Solyc11g011700.1	0.0237896	-2.44	SAUR-like auxin-responsive protein family (AHRD V3.3 *** AT2G21210.2)
Solyc01g110900.1	0.0176501	-2.45	SAUR-like auxin-responsive protein family (AHRD V3.3 *** AT4G34770.1)
Solyc02g082360.3	0.0175544	-2.48	Eukaryotic translation initiation factor 6 (AHRD V3.3 *** K4BAA6_SOLLC)
Solyc03g119910.3	0.00536049	-2.49	Le3OH-23b-hydroxylase
Solyc04g049920.3	0.0304021	-2.5	RNA-binding region-containing protein, putative (AHRD V3.3 *** B9SD37_RICCO)
Solyc04g011820.1	0.00308487	-2.51	Glutaredoxin (AHRD V3.3 *** A0A103Y3D7_CYNCS)
Solyc07g055010.3	0.023713	-2.51	Heavy metal transport/detoxification superfamily protein (AHRD V3.3 *** A0A061GX23_THECC)
Solyc11g011720.1	0.0152679	-2.52	SAUR-like auxin-responsive protein family (AHRD V3.3 *** AT5G18030.1)
Solyc03g093630.2	0.0205104	-2.53	Pentatricopeptide repeat-containing protein (AHRD V3.3 *** A0A0K9PNP9_ZOSMR)
Solyc05g023900.1	0.0239402	-2.53	Pentatricopeptide repeat-containing protein (AHRD V3.3 *** A0A103YG29_CYNCS)
Solyc01g108710.3	0.0208612	-2.54	transcription initiation factor TFIID subunit 1b-like protein (AHRD V3.3 -** AT3G19030.1)
Solyc06g007220.3	0.00229404	-2.55	60S ribosomal protein L41 (AHRD V3.3 -** RL41_ARATH)
Solyc02g068170.1	0.0088005	-2.55	LOW QUALITY:CAP-gly domain linker (AHRD V3.3 --* AT3G55060.3)
Solyc04g049750.3	0.00947311	-2.56	Pentatricopeptide (PPR) repeat protein (AHRD V3.3 --* A0A072VK89_MEDTR)
Solyc05g051310.1	0.0102307	-2.56	LOW QUALITY:Ethylene-responsive transcription factor 5 (AHRD V3.3 *-* ERF5_NICSY)
Solyc02g063230.1	0.00386855	-2.57	LOW QUALITY:membrane-associated kinase regulator (AHRD V3.3 *** AT1G67050.1)
Solyc06g008100.3	0.0239478	-2.57	Unknown protein (AHRD V3.3 )
Solyc05g055260.3	0.0020384	-2.59	Small nuclear ribonucleoprotein family protein (AHRD V3.3 *** AT3G11500.2)
Solyc10g076180.1	0.0127455	-2.59	ovate family protein 20
Solyc04g007685.1	0.00860751	-2.6	Hydroxyproline-rich glycoprotein (AHRD V3.3 -** B9HJA6_POPTR)
Solyc04g081655.1	0.018109	-2.6	Cyclin (AHRD V3.3 *-* G3G857_CAMSI)
Solyc01g109690.1	0.00542178	-2.61	MYB transcription factor (AHRD V3.3 *** F2WZH1_VITPS)
Solyc04g054510.3	0.0115903	-2.61	FK506-binding protein 16-2 (AHRD V3.3 *** AT4G39710.3)
Solyc06g065820.3	0.00421479	-2.62	Ethylene Response Factor H.1
Solyc05g053180.3	0.00697098	-2.62	ABC-2 and Plant PDR ABC-type transporter family protein (AHRD V3.3 --* AT4G15233.6)
Solyc04g072320.2	0.00268328	-2.64	RNA polymerase I subunit 43 (AHRD V3.3 --* AT1G60620.2)
Solyc03g113860.2	0.0147561	-2.64	Ribosomal RNA small subunit methyltransferase G (AHRD V3.3 *** W9SLG2_9ROSA)
Solyc04g052970.2	0.0191316	-2.65	SAUR-like auxin-responsive protein family (AHRD V3.3 *** AT5G18030.1)
Solyc03g098640.3	0.0117701	-2.66	Peroxisomal membrane 22 kDa (Mpv17/PMP22) family protein (AHRD V3.3 *** AT5G19750.1)
Solyc04g011860.1	0.0240012	-2.66	Glutaredoxin family protein (AHRD V3.3 *** B9I9V9_POPTR)
Solyc02g068190.1	0.0238654	-2.68	RNA helicase DEAD6
Solyc07g064760.2	0.00842895	-2.69	Eukaryotic release factor 1 (eRF1) family protein (AHRD V3.3 --* AT4G27650.3)
Solyc07g061720.3	0.000111286	-2.7	gibberellin 2-oxidase 4
Solyc08g074682.1	0.0033055	-2.72	polyphenol oxidase precursor
Solyc07g054600.3	0.027939	-2.72	F-box family protein (AHRD V3.3 *-* T1RU12_SILVU)
Solyc06g009260.3	0.00184492	-2.73	Acyl-CoA N-acyltransferase with RING/FYVE/PHD-type zinc finger protein (AHRD V3.3 --* AT3G14980.6)
Solyc03g078330.1	0.0146079	-2.74	3-ketoacyl-CoA synthase (AHRD V3.3 *** K4BHR2_SOLLC)
Solyc10g050510.1	0.00541682	-2.75	LOW QUALITY:transcription initiation factor TFIID subunit 1b-like protein (AHRD V3.3 -** AT3G19030.1)
Solyc07g052250.3	0.00861865	-2.75	Unknown protein (AHRD V3.3 )
Solyc11g067300.2	0.0086857	-2.75	ABC transporter B family protein (AHRD V3.3 *** G7IBR0_MEDTR)
Solyc08g080630.3	0.0129588	-2.75	Ethylene-responsive proteinase inhibitor 1 (AHRD V3.3 *** IER1_SOLLC)
Solyc02g083880.3	0.0087643	-2.76	Gibberellin-regulated protein 2, putative (AHRD V3.3 *** B9SLF4_RICCO)
Solyc04g064943.1	0.0127498	-2.78	Filament-plant-like protein (AHRD V3.3 *-* A0A072V4F5_MEDTR)
Solyc03g006090.2	0.0153266	-2.78	PAS/LOV protein B (AHRD V3.3 --* AT2G02710.4)
Solyc12g098110.1	0.0183165	-2.78	LOW QUALITY:Self-incompatibility S1 family protein (AHRD V3.3 *** Q9LIQ2_ARATH)
Solyc05g017790.1	0.0192866	-2.85	Disease resistance protein (TIR-NBS-LRR class) family (AHRD V3.3 --* AT5G44870.2)
Solyc01g091700.3	0.00594958	-2.88	F-box family protein (AHRD V3.3 *** B9IC61_POPTR)
Solyc05g054090.3	0.00637634	-2.88	UDP-3-O-acyl N-acetylglycosamine deacetylase family protein (AHRD V3.3 --* AT1G25210.2)
Solyc01g057680.3	0.0123543	-2.91	Leucine-rich receptor-like protein kinase family protein (AHRD V3.3 --* AT2G26330.1)
Solyc09g007050.1	0.00571966	-2.95	Pentatricopeptide repeat-containing protein (AHRD V3.3 *** A0A118JTY1_CYNCS)
Solyc01g058200.3	0.0151476	-2.95	Peroxisomal membrane 22 kDa (Mpv17/PMP22) family protein (AHRD V3.3 --* AT3G24570.2)
Solyc09g063150.3	0.0238542	-2.97	Glutathione s-transferase, putative (AHRD V3.3 *** B9SH83_RICCO)
Solyc07g056080.1	0.00810155	-2.98	LOW QUALITY:Acidic endochitinase SE2 (AHRD V3.3 --* CHIE_BETVU)
Solyc01g095160.3	0.0119518	-2.98	Pentatricopeptide repeat (PPR) superfamily protein (AHRD V3.3 *** AT4G37170.1)
Solyc04g074710.3	0.0200403	-2.98	Queuine tRNA-ribosyltransferase catalytic subunit 1 (AHRD V3.3 *** K4BU09_SOLLC)
Solyc01g066270.3	0.00240005	-2.99	LOW QUALITY:AT-hook motif nuclear-localized protein 1 (AHRD V3.3 --* AT4G12080.1)
Solyc08g080530.1	0.020882	-2.99	LOW QUALITY:BON1-associated protein 2 (AHRD V3.3 *-* A0A1D1XW49_9ARAE)
Solyc07g052310.1	0.00286889	-3.01	LOW QUALITY:CDP-diacylglycerol-glycerol-3-phosphate 3-phosphatidyltransferase (AHRD V3.3 --* AT3G48180.1)
Solyc04g011830.1	0.00876232	-3.01	Glutaredoxin (AHRD V3.3 *** A0A103Y7J3_CYNCS)
Solyc03g044850.1	0.00895219	-3.03	LOW QUALITY:Dehydrin family protein, expressed (AHRD V3.3 --* Q40711_ORYSJ)
Solyc10g084020.1	0.0155079	-3.06	SAUR-like auxin-responsive protein family, putative (AHRD V3.3 *** A0A061EU13_THECC)
Solyc11g066930.1	0.00811647	-3.07	DUF868 family protein (DUF868) (AHRD V3.3 *** AT2G27770.1)
Solyc08g007230.2	0.0217684	-3.08	Ethylene-responsive transcription factor (AHRD V3.3 *** A0A024CAT9_BRAJU)
Solyc01g011010.3	0.000748944	-3.09	Phosphatidylinositol 4-phosphate 5-kinase 8 (AHRD V3.3 --* PI5K8_ARATH)
Solyc04g011810.1	0.00371627	-3.11	Glutaredoxin (AHRD V3.3 *** A0A103XEX1_CYNCS)
Solyc04g081560.3	0.0133317	-3.23	Pathogenesis-related thaumatin family protein (AHRD V3.3 *** A0A072UXB7_MEDTR)
Solyc09g090600.3	0.00124179	-3.24	Acid phosphatase 1 (AHRD V3.3 *** A0A0B2QYK4_GLYSO)
Solyc03g093120.4	0.0191536	-3.26	xyloglucan endotransglucosylase-hydrolase
Solyc04g011800.1	0.0081057	-3.3	Glutaredoxin family protein (AHRD V3.3 *** B9I9V9_POPTR)
Solyc05g052890.3	0.00628157	-3.31	Cytochrome f (AHRD V3.3 --* CYF_PINTH)
Solyc07g007730.3	0.00364498	-3.32	Defensin protein (AHRD V3.3 *** B1N679_SOLLC)
Solyc07g049460.3	0.0219523	-3.34	laccase
Solyc03g096055.1	0.00246364	-3.4	DNA-directed RNA polymerase II protein (AHRD V3.3 --* AT1G77890.5)
Solyc09g064910.1	0.0160827	-3.42	Adenylate isopentenyltransferase (AHRD V3.3 *** I0IUP8_SOLLC)
Solyc01g110785.1	0.00723296	-3.48	SAUR-like auxin-responsive protein family (AHRD V3.3 *** AT5G18030.1)
Solyc11g006450.2	0.000757262	-3.55	RING/U-box superfamily protein (AHRD V3.3 *** A0A061FQW5_THECC)
Solyc01g110930.1	0.00260523	-3.56	SAUR-like auxin-responsive protein family (AHRD V3.3 *** AT5G18030.1)
Solyc01g080410.3	0.00126965	-3.57	Methionine sulfoxide reductase, putative (AHRD V3.3 *** B9RX37_RICCO)
Solyc02g088205.1	0.00823001	-3.68	Activating signal cointegrator 1 complex subunit 1 (AHRD V3.3 --* A0A1D1XDP2_9ARAE)
Solyc06g063390.3	0.0115366	-3.75	Wound-induced basic protein (AHRD V3.3 *** PR4_PHAVU)
Solyc09g082820.3	0.000245089	-3.87	cytochrome P450, family 71, subfamily A, polypeptide 19 (AHRD V3.3 --* AT4G13290.1)
Solyc05g052880.3	0.0089092	-3.88	Plant/T7H20-70 protein (AHRD V3.3 *** A0A072U1L2_MEDTR)
Solyc12g006760.1	0.00897017	-3.92	glutathione S-transferase zeta 1 (AHRD V3.3 --* AT2G02390.2)
Solyc00g042840.1	0.00818179	-3.98	LOW QUALITY:F-box family protein (AHRD V3.3 *** B9H429_POPTR)
Solyc02g031975.1	0.00236834	-4.03	Mannose-binding lectin superfamily protein (AHRD V3.3 --* AT1G52130.2)
Solyc01g079830.3	7.1163e-11	-4.07	Fatty acid hydroxylase superfamily (AHRD V3.3 --* AT1G02205.1)
Solyc01g007080.3	0.00305836	-4.08	aluminum activated malate transporter family protein (AHRD V3.3 *** AT3G11680.2)
Solyc09g005590.3	0	-4.24	SelT-like protein (AHRD V3.3 *-* SELT_ARATH)
Solyc08g061595.1	0.00658493	-4.26	uroporphyrinogen-III synthase family protein (AHRD V3.3 --* AT2G26540.3)
Solyc11g006910.2	0.000157306	-4.53	Ferredoxin family protein (AHRD V3.3 *** B9MYW6_POPTR)
Solyc04g011750.3	0.00766673	-4.67	Protein TIC 214 (AHRD V3.3 --* TI214_VITVI)
Solyc09g005580.3	4.996e-15	-4.71	SelT-like protein (AHRD V3.3 *-* A0A0B2PRT5_GLYSO)
Solyc12g089190.1	0.00237296	-4.85	Myb family transcription factor family protein (AHRD V3.3 *** B9H0R6_POPTR)
Solyc03g078620.1	1.9984e-15	-5.3	LOW QUALITY:Nitric oxide synthase-interacting protein, putative (AHRD V3.3 *** A0A061DQB5_THECC)
